# Supplementary material for: Synthesis of tetrasubstituted furans through a Cu/base-mediated cascade reaction from terminal alkynes and 1,2-diketones
Source: Royal Society of Chemistry journal article supplement (doi:10.1039/d4ob01785d), 2024-12-04
Supplement: d4ob01785d1.pdf [file d4ob01785d1.pdf]

## Supporting Information

### Synthesis of tetrasubstituted furans through a Cu/base-mediated cascade reaction from terminal alkynes and 1,2- diketones

Jian Fan,<sup>\*a,b</sup> Xuecheng Liang,<sup>a</sup> Liangliang Yao,<sup>c</sup> Yating Wang,<sup>a</sup> Kai Wang,<sup>a</sup> Bangben Yao,<sup>b</sup> Yujun Liu<sup>\*a</sup> and Shuwen Xu<sup>\*a</sup>

<sup>a</sup> Anhui Academy of Science and Technology, Hefei 230088, China.

<sup>b</sup> Anhui Product Quality Supervision & Inspection Research Institute.

<sup>c</sup> School of Materials and Chemical Engineering, ChuZhou University.

|                                                                    |         |
|--------------------------------------------------------------------|---------|
| ◆ General Information and Procedure for the Reaction.....          | S2      |
| 1. General information.....                                        | S2      |
| 2. Optimization of reaction conditions.....                        | S2-S3   |
| 3. General procedure for synthesis of tetrasubstituted furans..... | S3      |
| 4. Unsuccessful terminal alkyne and 1,2-diketones.....             | S3      |
| 5. Gram-scale reaction and applications.....                       | S4-S5   |
| ◆ Analytic Data of Products.....                                   | S6-S21  |
| ◆ Copies of <sup>1</sup> H and <sup>13</sup> C Spectra.....        | S22-S54 |
| ◆ X-ray crystallographic data of <b>3ga</b> and <b>3ia</b> .....   | S55-S57 |

---

\* Corresponding author. Tel.: +86 0551 65149890; Fax: +86 0551 65145209. E-mail address: jianF@ahnu.edu.cn

## 1. General information:

All commercial materials were used as received unless otherwise noted. Commercial reagents were purchased from Alfa Aesar, TCI, Energy Chemical, and used without further purification.  $^1\text{H}$  NMR spectra were recorded at 400 MHz or 500 MHz NMR spectrometers using TMS as an internal standard,  $^{13}\text{C}$  NMR spectra were recorded at 100 MHz or 125 MHz NMR spectrometers using TMS as an internal standard and were fully decoupled by broad band proton decoupling. The multiplicities are reported as follows: singlet (s), doublet (d), doublet of doublets (dd), multiplet (m), triplet (t) and broad resonances (br). Melting points were measured on a hot-stage microscope (XT4-A) and are uncorrected. High resolution mass spectra (HRMS) were obtained on an APEXM Fourier transform mass spectrometry (APCI).

**Table S1 Optimization of reaction conditions <sup>a</sup>**

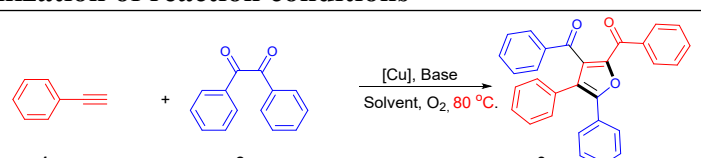

| Entry | [Cu]                                   | Base                            | Solvent | Yield (%) <sup>b</sup> |
|-------|----------------------------------------|---------------------------------|---------|------------------------|
| 1     | Cu(OAc) <sub>2</sub> ·H <sub>2</sub> O | DMAP                            | DMSO    | 45                     |
| 2     | CuBr <sub>2</sub>                      | DMAP                            | DMSO    | 38                     |
| 3     | CuCl                                   | DMAP                            | DMSO    | 32                     |
| 4     | CuBr                                   | DMAP                            | DMSO    | 36                     |
| 5     | CuI                                    | DMAP                            | DMSO    | 25                     |
| 6     | Cu(OAc) <sub>2</sub> ·H <sub>2</sub> O | 4-PPy                           | DMSO    | 55                     |
| 7     | Cu(OAc) <sub>2</sub> ·H <sub>2</sub> O | DABCO                           | DMSO    | 0                      |
| 8     | Cu(OAc) <sub>2</sub> ·H <sub>2</sub> O | Pyridine                        | DMSO    | 0                      |
| 9     | Cu(OAc) <sub>2</sub> ·H <sub>2</sub> O | Et <sub>3</sub> N               | DMSO    | 0                      |
| 10    | Cu(OAc) <sub>2</sub> ·H <sub>2</sub> O | DBU                             | DMSO    | 0                      |
| 11    | Cu(OAc) <sub>2</sub> ·H <sub>2</sub> O | K <sub>2</sub> CO <sub>3</sub>  | DMSO    | 0                      |
| 12    | Cu(OAc) <sub>2</sub> ·H <sub>2</sub> O | KOH                             | DMSO    | 0                      |
| 13    | Cu(OAc) <sub>2</sub> ·H <sub>2</sub> O | NaOH                            | DMSO    | 0                      |
| 14    | Cu(OAc) <sub>2</sub> ·H <sub>2</sub> O | Na <sub>2</sub> CO <sub>3</sub> | DMSO    | 0                      |
| 15    | Cu(OAc) <sub>2</sub> ·H <sub>2</sub> O | 4-PPy                           | DMF     | 0                      |
| 16    | Cu(OAc) <sub>2</sub> ·H <sub>2</sub> O | 4-PPy                           | THF     | 0                      |
| 17    | Cu(OAc) <sub>2</sub> ·H <sub>2</sub> O | 4-PPy                           | dioxane | 10                     |
| 18    | Cu(OAc) <sub>2</sub> ·H <sub>2</sub> O | 4-PPy                           | toluene | 0                      |
| 19    | Cu(OAc) <sub>2</sub> ·H <sub>2</sub> O | 4-PPy                           | NMP     | 0                      |
| 20    | Cu(OAc) <sub>2</sub> ·H <sub>2</sub> O | 4-PPy                           | DMSO    | 63 <sup>c</sup>        |
| 21    | Cu(OAc) <sub>2</sub> ·H <sub>2</sub> O | 4-PPy                           | DMSO    | 75 <sup>d</sup>        |
| 22    | Cu(OAc) <sub>2</sub> ·H <sub>2</sub> O | 4-PPy                           | DMSO    | 74 <sup>e</sup>        |
| 23    | Cu(OAc) <sub>2</sub> ·H <sub>2</sub> O | 4-PPy                           | toluene | 0 <sup>d</sup>         |

|    |                                        |       |     |                    |
|----|----------------------------------------|-------|-----|--------------------|
| 24 | Cu(OAc) <sub>2</sub> ·H <sub>2</sub> O | 4-PPy | THF | 0 <sup>d</sup>     |
| 25 | Cu(OAc) <sub>2</sub> ·H <sub>2</sub> O | 4-PPy | NMP | trace <sup>d</sup> |
| 26 | Cu(OAc) <sub>2</sub> ·H <sub>2</sub> O | 4-PPy | DMF | 15 <sup>d</sup>    |

<sup>a</sup> Reaction conditions: **1a** (0.5 mmol), **2a** (1.0 equiv.), [Cu] (5 mol%), Base (1.0 equiv.) solvent (1 mL), 72 h, O<sub>2</sub>. <sup>b</sup> Isolated yield by flash column chromatography based on **1a**. 4-PPy = 4-Pyrrolidinopyridine. <sup>c</sup> 90 °C. <sup>d</sup> 100 °C. <sup>e</sup> 110 °C.

## 2. General procedure for synthesis of tetrasubstituted furans

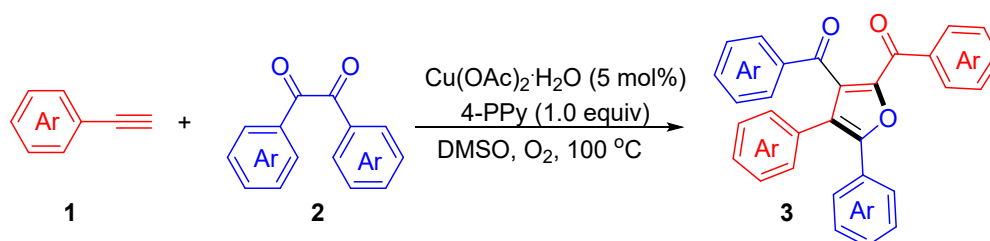

To a stirring mixture of terminal alkynes **1** (0.5 mmol), 1, 2-diketones **2** (0.5 mmol) and Cu(OAc)<sub>2</sub>·H<sub>2</sub>O (0.025 mmol) in 1.0 mL DMSO were added successively 4-pyrrolidinopyridine (0.5 mmol, 0.06 g). The reaction mixture was stirred at 100 °C under O<sub>2</sub> atmosphere for 72 h. After the completion of the reaction (monitored by TLC), the reaction mixture was quenched with saturated NH<sub>4</sub>Cl and extracted with ethyl acetate (3 × 10 mL). The combined organics were dried over anhydrous Na<sub>2</sub>SO<sub>4</sub> and the filtrate was concentrated under reduced pressure. The crude product was purified by column chromatography on silica gel (ethyl acetate /petroleum ether = 1/10) to afford products **3**.

## 3. Unsuccessful terminal alkyne and 1,2-diketones

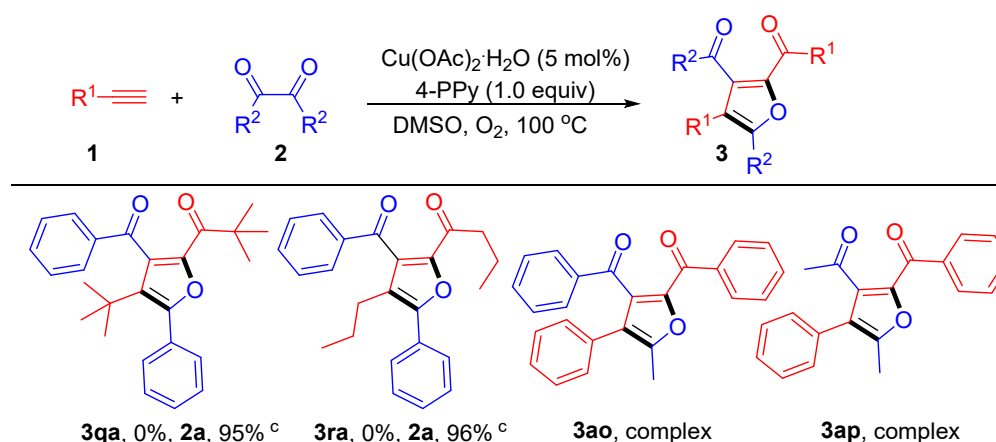

Reaction conditions: **1** (0.5 mmol), **2** (1.0 equiv.), Cu(OAc)<sub>2</sub>·H<sub>2</sub>O (5 mol%), 4-PPy (1.0 equiv.) DMSO (1 mL), 72 h, O<sub>2</sub>. <sup>c</sup> Recovery of **2a**.

#### 4. Gram-scale reaction and Applications

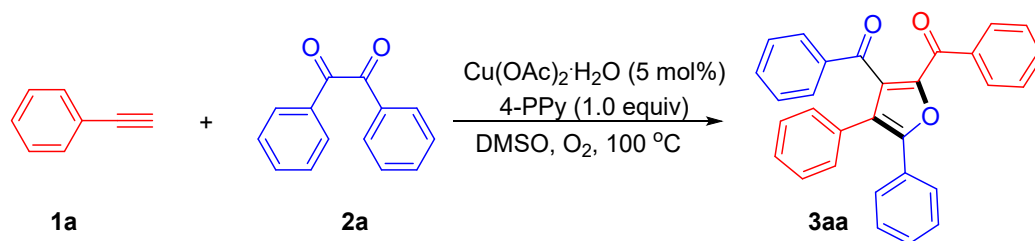

To a stirring mixture of ethynylbenzene **1a** (10.0 mmol, 1.02 g), benzil **2a** (10.0 mmol, 2.1 g) and Cu(OAc)<sub>2</sub>·H<sub>2</sub>O (0.5 mmol, 0.1g) in 10 mL DMSO were added successively 4-pyrrolidinopyridine (10.0 mmol, 1.48 g). The reaction mixture was stirred at 100 °C under O<sub>2</sub> atmosphere for 72 h. After the completion of the reaction (monitored by TLC), the reaction mixture was quenched with saturated NH<sub>4</sub>Cl and extracted with ethyl acetate (3 × 10 mL). The combined organics were dried over anhydrous Na<sub>2</sub>SO<sub>4</sub> and the filtrate was concentrated under reduced pressure. The crude product was purified by column chromatography on silica gel (ethyl acetate /petroleum ether = 1/10) to afford products **3aa**.

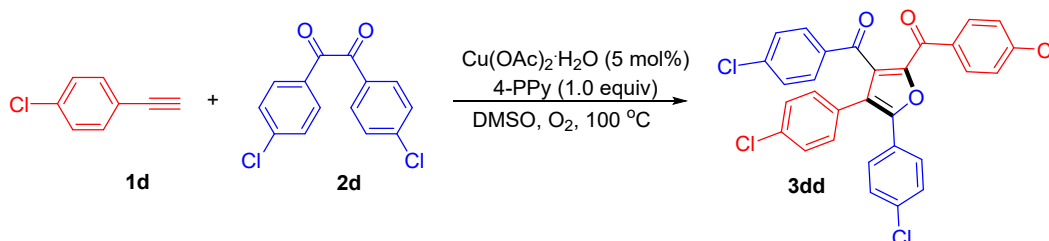

To a stirring mixture of 1-chloro-4-ethynylbenzene **1d** (10.0 mmol, 1.36 g), 1,2-bis(4-chlorophenyl)ethane-1,2-dione **2d** (10.0 mmol, 2.78 g) and Cu(OAc)<sub>2</sub>·H<sub>2</sub>O (0.5 mmol, 0.1g) in 10 mL DMSO were added successively 4-pyrrolidinopyridine (10.0 mmol, 1.48 g). The reaction mixture was stirred at 100 °C under O<sub>2</sub> atmosphere for 72 h. After the completion of the reaction (monitored by TLC), the reaction mixture was quenched with saturated NH<sub>4</sub>Cl and extracted with ethyl acetate (3 × 10 mL). The combined organics were dried over anhydrous Na<sub>2</sub>SO<sub>4</sub> and the filtrate was concentrated under reduced pressure. The crude product was purified by column chromatography on silica gel (ethyl acetate /petroleum ether = 1/10) to afford products **3ee**.

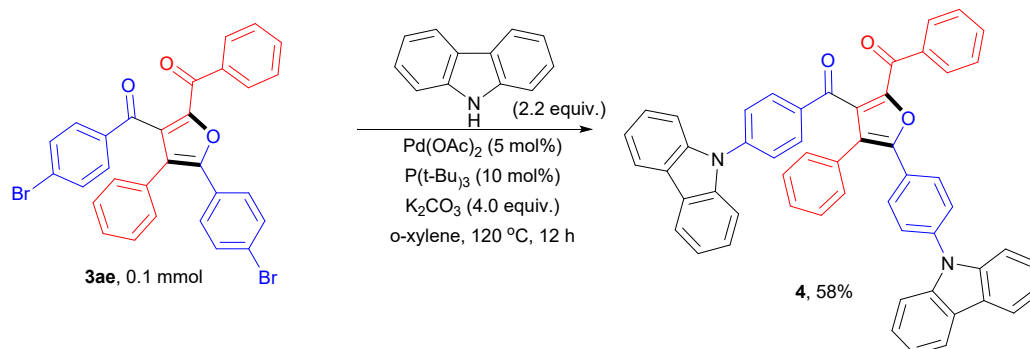

$\text{3ae}$  (0.1 mmol), Pd(OAc)<sub>2</sub> (5 mol%), P(t-Bu)<sub>3</sub> (10 mol%), K<sub>2</sub>CO<sub>3</sub> (0.4 mmol) and 9H-carbazole (0.22 mmol) were dissolved in o-xylene (2 ml) under Ar atmosphere, then the mixture was stirred at 120 °C for 12 hour. The solvent was removed in vacuo and the residue was chromatographed on silica gel (petroleum ether:diethyl ether 10:1) to yield in  $\text{4}$  (58% yield).

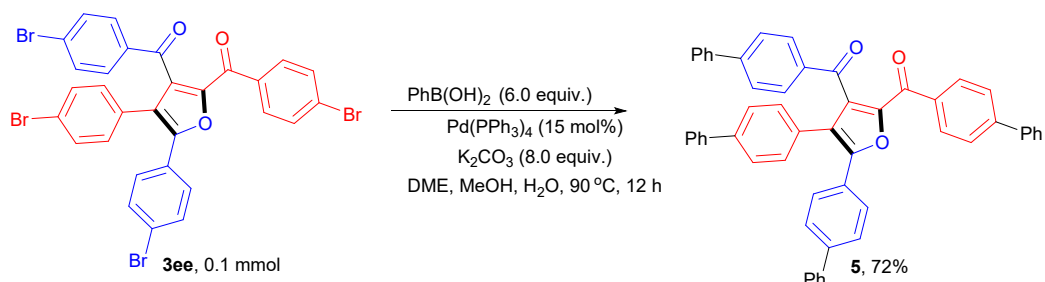

A Schlenk tube was charged with a solution of  $\text{3ae}$  (0.1 mmol) and Pd(PPh<sub>3</sub>)<sub>4</sub> (0.015 mmol) in DME (2 mL). A solution of K<sub>2</sub>CO<sub>3</sub> (0.8 mmol) in H<sub>2</sub>O (0.5 mL) and a solution of the naphthalen-1-ylboronic acid (0.6 mmol) in MeOH (1 mL) were sequentially added. The reaction mixture was stirred at 90 °C overnight (oil bath). After cooling to room temperature, the reaction mixture was quenched with H<sub>2</sub>O (5 mL) and extracted with CH<sub>2</sub>Cl<sub>2</sub> (3×5 mL). The combined organic layers were dried over Na<sub>2</sub>SO<sub>4</sub>, filtered, concentrated, and the residue was chromatographed on silica gel (petroleum ether:diethyl ether 10:1) to yield in  $\text{5}$  (72% yield).

## Analytic Data of Products

(4,5-diphenylfuran-2,3-diyl)bis(phenylmethanone) (**3aa**)

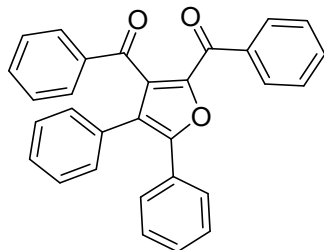

Yellow solid; m.p. 105-106 °C; (80.3 mg, yield: 75%); <sup>1</sup>H NMR (400 MHz, CDCl<sub>3</sub>) δ 8.12 (d, *J* = 7.3 Hz, 2H), 7.87 (d, *J* = 7.3 Hz, 2H), 7.61 – 7.53 (m, 3H), 7.52 – 7.45 (m, 3H), 7.39 – 7.24 (m, 10H). <sup>13</sup>C NMR (100 MHz, CDCl<sub>3</sub>) δ 191.6, 181.2, 152.5, 147.8, 137.1, 136.4, 135.9, 133.6, 133.0, 130.7, 129.9, 129.7, 129.4, 129.2, 128.9, 128.8, 128.6, 128.5, 128.4, 126.9, 124.6. HRMS *m/z* (APCI) calcd for C<sub>30</sub>H<sub>21</sub>O<sub>3</sub> (M+H)<sup>+</sup> 429.1485 found 429.1483.

(3-benzoyl-5-phenyl-4-(*p*-tolyl)furan-2-yl)(*p*-tolyl)methanone (**3ba**)

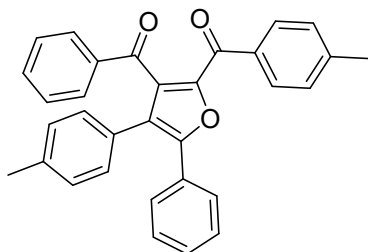

Yellow solid; m.p. 136-137 °C; (73 mg, yield: 64%); <sup>1</sup>H NMR (400 MHz, CDCl<sub>3</sub>) δ 8.07 (d, *J* = 8.2 Hz, 2H), 7.91 – 7.86 (m, 2H), 7.61-7.58 (m, 2H), 7.52 – 7.47 (m, 1H), 7.41 – 7.32 (m, 5H), 7.30 (d, *J* = 8.1 Hz, 2H), 7.21 (d, *J* = 8.1 Hz, 2H), 7.09 (d, *J* = 7.9 Hz, 2H), 2.44 (s, 3H), 2.31 (s, 3H). <sup>13</sup>C NMR (100 MHz, CDCl<sub>3</sub>) δ 191.7, 180.7, 152.2, 148.0, 143.9, 138.1, 137.2, 135.8, 133.8, 133.5, 130.0, 129.6, 129.5, 129.4, 129.2, 129.21, 129.19, 128.7, 128.5, 127.7, 126.9, 124.6, 21.8, 21.3. HRMS *m/z* (APCI) calcd for C<sub>32</sub>H<sub>25</sub>O<sub>3</sub> (M+H)<sup>+</sup> 457.1798 found 457.1796.

(3-benzoyl-4-(4-methoxyphenyl)-5-phenylfuran-2-yl)(4-methoxyphenyl)methanone (

**3ca)**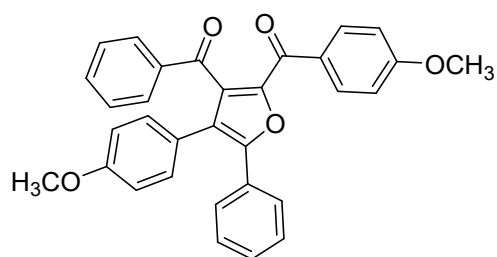

Yellow solid; m.p. 143-144 °C; (70.8 mg, yield: 58%); <sup>1</sup>H NMR (400 MHz, CDCl<sub>3</sub>) δ 8.19 (d, *J* = 8.8 Hz, 2H), 7.88 (d, *J* = 7.5 Hz, 2H), 7.59-7.57 (m, 2H), 7.50 (t, *J* = 7.4 Hz, 1H), 7.40 – 7.34 (m, 5H), 7.22 (d, *J* = 8.6 Hz, 2H), 6.98 (d, *J* = 8.8 Hz, 2H), 6.81 (d, *J* = 8.6 Hz, 2H), 3.89 (s, 3H), 3.77 (s, 3H). <sup>13</sup>C NMR (100 MHz, CDCl<sub>3</sub>) δ 191.9, 179.5, 163.6, 159.5, 151.9, 148.1, 137.2, 135.7, 133.5, 132.3, 130.9, 129.5, 129.2, 129.1, 129.1, 128.8, 128.6, 126.8, 124.1, 122.8, 114.4, 113.8, 55.5, 55.2. HRMS *m/z* (APCI) calcd for C<sub>32</sub>H<sub>25</sub>O<sub>5</sub> (M+H)<sup>+</sup> 489.1696 found 489.1692.

**(3-benzoyl-4-(4-chlorophenyl)-5-phenylfuran-2-yl)(4-chlorophenyl)methanone (3da)**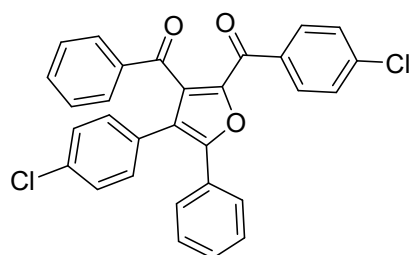

Yellow solid; m.p. 162-163 °C; (101.7 mg, yield: 82%); <sup>1</sup>H NMR (400 MHz, CDCl<sub>3</sub>) δ 8.07 – 8.02 (m, 2H), 7.86 – 7.81 (m, 2H), 7.53 – 7.49 (m, 3H), 7.46-7.43 (m, 2H), 7.40 – 7.34 (m, 5H), 7.26 – 7.21 (m, 4H). <sup>13</sup>C NMR (100 MHz, CDCl<sub>3</sub>) δ 191.2, 179.7, 152.87, 147.6, 139.63, 136.9, 135.94, 134.6, 134.5, 133.9, 131.2, 131.0, 129.8, 129.3, 129.1, 129.0, 128.96, 128.9, 128.8, 128.7, 127.0, 123.4. HRMS *m/z* (APCI) calculated for C<sub>30</sub>H<sub>19</sub>Cl<sub>2</sub>O<sub>3</sub> (M+H)<sup>+</sup> 497.0705 found 497.0702.

(3-benzoyl-4-(4-bromophenyl)-5-phenylfuran-2-yl)(4-bromophenyl)methanone (**3ea**)

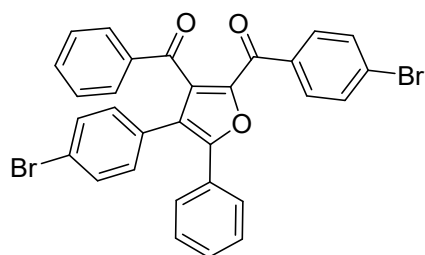

Yellow solid; m.p. 154-155 °C; (106.6 mg, yield: 73%); <sup>1</sup>H NMR (400 MHz, CDCl<sub>3</sub>) δ 7.99 (d, *J* = 8.5 Hz, 2H), 7.86 (d, *J* = 7.4 Hz, 2H), 7.63 (d, *J* = 8.5 Hz, 2H), 7.56 – 7.49 (m, 3H), 7.44 – 7.35 (m, 7H), 7.18 (d, *J* = 8.3 Hz, 2H). <sup>13</sup>C NMR (100 MHz, CDCl<sub>3</sub>) δ 191.2, 180.0, 152.9, 147.6, 136.9, 135.9, 135.0, 133.9, 132.2, 131.9, 131.3, 129.8, 129.5, 129.1, 129.0, 128.8, 128.7, 128.75, 128.4, 127.0, 123.4, 122.9. HRMS *m/z* (APCI) calcd for C<sub>30</sub>H<sub>19</sub>Br<sub>2</sub>O<sub>3</sub> (M+H)<sup>+</sup> 584.9695 found 584.9690.

(3-benzoyl-4-(4-nitrophenyl)-5-phenylfuran-2-yl)(4-nitrophenyl)methanone (**3fa**)

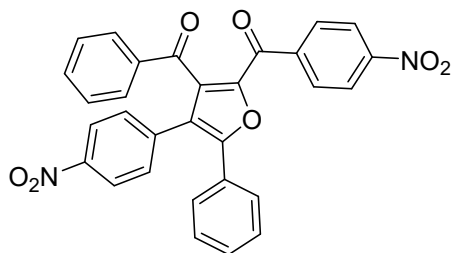

Yellow solid; m.p. 130-131 °C; (98.4 mg, yield: 76%); <sup>1</sup>H NMR (400 MHz, CDCl<sub>3</sub>) δ 8.35 (d, *J* = 8.8 Hz, 2H), 8.25 (d, *J* = 8.8 Hz, 2H), 8.16 (d, *J* = 8.7 Hz, 2H), 7.86 (d, *J* = 7.4 Hz, 2H), 7.57 (t, *J* = 7.4 Hz, 1H), 7.52 – 7.47 (m, 4H), 7.46 – 7.37 (m, 5H). <sup>13</sup>C NMR (100 MHz, CDCl<sub>3</sub>) δ 190.92, 179.57, 154.57, 150.55, 148.13, 147.8, 141.24, 137.67, 136.83, 136.58, 134.74, 131.06, 131.01, 130.94, 129.62, 129.49, 129.33, 128.33, 127.61, 124.63, 124.08, 123.01. HRMS *m/z* (APCI) calcd for C<sub>30</sub>H<sub>19</sub>N<sub>2</sub>O<sub>7</sub> (M+H)<sup>+</sup> 519.1187 found 519.1184.

(3-benzoyl-5-phenyl-4-(*m*-tolyl)furan-2-yl)(*m*-tolyl)methanone (**3ga**)



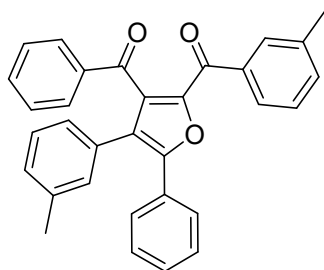

Yellow solid; m.p. 116-117 °C; (71.9 mg, yield: 63%);  $^1\text{H}$  NMR (400 MHz,  $\text{CDCl}_3$ )  $\delta$  7.95 – 7.91 (m, 1H), 7.85 – 7.83 (m, 3H), 7.60 – 7.55 (m, 2H), 7.52 – 7.46 (m, 1H), 7.39 – 7.32 (m, 7H), 7.20 – 7.07 (m, 4H), 2.39 (s, 3H), 2.24 (s, 3H).  $^{13}\text{C}$  NMR (100 MHz,  $\text{CDCl}_3$ )  $\delta$  191.5, 181.5, 152.3, 147.8, 138.5, 138.3, 137.3, 136.5, 135.8, 133.7, 133.4, 130.6, 130.29, 129.3, 129.3, 129.2, 129.1, 128.7, 128.5, 128.3, 127.0, 126.8, 126.7, 124.7, 21.4, 21.4. HRMS  $m/z$  (APCI) calcd for  $\text{C}_{32}\text{H}_{25}\text{O}_3$  ( $\text{M}+\text{H}$ ) $^+$  457.1798 found 457.1794.

(3-benzoyl-4-(3-methoxyphenyl)-5-phenylfuran-2-yl)(3-methoxyphenyl)methanone (**3ha**)

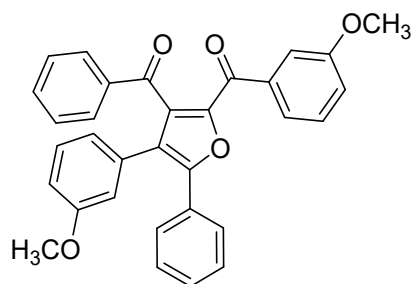

Yellow solid; m.p. 173-174 °C; (73.2 mg, yield: 60%);  $^1\text{H}$  NMR (400 MHz,  $\text{CDCl}_3$ )  $\delta$  7.93 – 7.86 (m, 2H), 7.80 (d,  $J = 7.7$  Hz, 1H), 7.65 – 7.56 (m, 3H), 7.53-7.49 (m, 1H), 7.43 – 7.32 (m, 6H), 7.19 (t,  $J = 7.8$  Hz, 1H), 7.15 – 7.12 (m, 1H), 6.90 (d,  $J = 7.6$  Hz, 1H), 6.84 – 6.81 (m, 2H), 3.82 (s, 3H), 3.63 (s, 3H).  $^{13}\text{C}$  NMR (100 MHz,  $\text{CDCl}_3$ )  $\delta$  191.5, 180.8, 159.7, 159.6, 152.6, 147.7, 137.6, 137.2, 136.1, 133.6, 131.9, 130.0, 129.5, 129.5, 129.2, 129.1, 128.8, 128.6, 126.9, 124.4, 122.6, 122.0, 120.1, 114.7, 114.5, 113.6, 55.4, 55.1. HRMS  $m/z$  (APCI) calcd for  $\text{C}_{32}\text{H}_{25}\text{O}_5$  ( $\text{M}+\text{H}$ ) $^+$  489.1696 found 489.1693.

(3-benzoyl-4-(3-chlorophenyl)-5-phenylfuran-2-yl)(3-chlorophenyl)methanone (**3ia**)

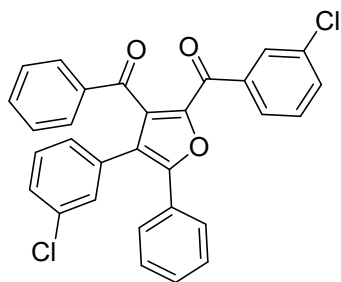

Yellow solid; m.p. 128-129 °C; (105.4 mg, yield: 85%);  $^1\text{H}$  NMR (400 MHz,  $\text{CDCl}_3$ )  $\delta$  8.07 – 8.06 (m, 1H), 8.00 – 7.98 (m, 1H), 7.86 – 7.80 (m, 2H), 7.58 – 7.50 (m, 4H), 7.44 – 7.36 (m, 6H), 7.31 – 7.29 (m, 1H), 7.29 – 7.17 (m, 3H).  $^{13}\text{C}$  NMR (100 MHz,  $\text{CDCl}_3$ )  $\delta$  190.9, 179.6, 153.2, 147.4, 137.8, 136.9, 136.1, 134.8, 134.7, 133.9, 133.0, 132.4, 130.3, 129.9, 129.9, 129.8, 129.7, 129.1, 129.0, 128.8, 128.7, 128.6, 128.0, 127.8, 127.0, 123.2. HRMS  $m/z$  (APCI) calculated for  $\text{C}_{30}\text{H}_{19}\text{Cl}_2\text{O}_3$  ( $\text{M}+\text{H}$ ) $^+$  497.0705 found 497.0699.

(3-benzoyl-4-(3-bromophenyl)-5-phenylfuran-2-yl)(3-bromophenyl)methanone (**3ja**)

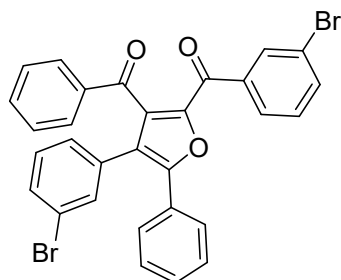

Yellow solid; m.p. 132-133 °C; (112.4 mg, yield: 77%);  $^1\text{H}$  NMR (400 MHz,  $\text{CDCl}_3$ )  $\delta$  8.22 – 8.21 (m, 1H), 8.02 (d,  $J = 7.8$  Hz, 1H), 7.86 – 7.79 (m, 2H), 7.73 – 7.66 (m, 1H), 7.58 – 7.51 (m, 3H), 7.48 – 7.35 (m, 8H), 7.26 – 7.23 (m, 1H), 7.18 – 7.14 (m, 1H).  $^{13}\text{C}$  NMR (100 MHz,  $\text{CDCl}_3$ )  $\delta$  190.9, 179.5, 153.2, 147.4, 138.0, 136.9, 136.1, 135.9, 133.9, 132.7, 132.6, 132.5, 131.7, 130.5, 130.1, 129.9, 129.1, 129.0, 128.7, 128.6, 128.4, 128.2, 127.0, 123.1, 122.8, 122.7. HRMS  $m/z$  (APCI) calcd for  $\text{C}_{30}\text{H}_{19}\text{Br}_2\text{O}_3$  ( $\text{M}+\text{H}$ ) $^+$  584.9695 found 584.9690.

(3-benzoyl-5-phenyl-4-(*o*-tolyl)furan-2-yl)(*o*-tolyl)methanone (**3ka**)

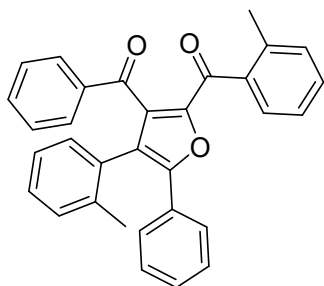

Yellow solid; m.p. 124-125 °C; (69.6 mg, yield: 61%);  $^1\text{H}$  NMR (400 MHz,  $\text{CDCl}_3$ )  $\delta$  7.62 (d,  $J = 7.3$  Hz, 2H), 7.51 (d,  $J = 7.5$  Hz, 1H), 7.46 – 7.42 (m, 3H), 7.31 – 7.23 (m, 7H), 7.21 – 7.18 (m, 2H), 7.16 – 7.11 (m, 2H), 7.05 (d,  $J = 7.6$  Hz, 1H), 2.26 (s, 3H), 2.15 (s, 3H).  $^{13}\text{C}$  NMR (100 MHz,  $\text{CDCl}_3$ )  $\delta$  190.6, 184.5, 152.6, 147.6, 137.7, 137.4, 136.9, 135.4, 133.3, 131.1, 131.0, 130.4, 130.4, 130.2, 129.3, 128.8, 128.8, 128.8, 128.3, 126.2, 125.8, 125.2, 123.8, 20.12, 19.88. HRMS  $m/z$  (APCI) calcd for  $\text{C}_{32}\text{H}_{25}\text{O}_3$  ( $\text{M}+\text{H}$ ) $^+$  457.1798 found 457.1793.

(3-benzoyl-4-(2-chlorophenyl)-5-phenylfuran-2-yl)(2-chlorophenyl)methanone (**3la**)

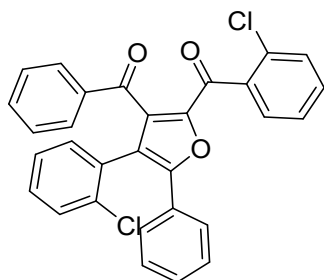

Yellow solid; m.p. 142-143 °C; (84.3 mg, yield: 68%);  $^1\text{H}$  NMR (400 MHz,  $\text{CDCl}_3$ )  $\delta$  7.80 – 7.73 (m, 2H), 7.53 – 7.42 (m, 5H), 7.41 – 7.25 (m, 11H).  $^{13}\text{C}$  NMR (100 MHz,  $\text{CDCl}_3$ )  $\delta$  190.2, 181.5, 154.0, 146.9, 136.9, 136.8, 135.3, 134.3, 133.6, 132.5, 132.2, 132.0, 130.2, 130.1, 130.0, 129.9, 129.7, 129.2, 129.0, 128.8, 128.4, 127.2, 126.6, 126.2, 121.80. HRMS  $m/z$  (APCI) calculated for  $\text{C}_{30}\text{H}_{19}\text{Cl}_2\text{O}_3$  ( $\text{M}+\text{H}$ ) $^+$  497.0705 found 497.0701.

(3-benzoyl-4-(2-bromophenyl)-5-phenylfuran-2-yl)(2-bromophenyl)methanone (**3ma**)

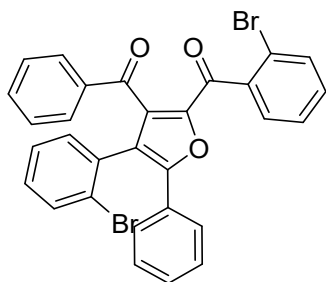

Yellow solid; m.p. 162-163 °C; (97.8 mg, yield: 67%);  $^1\text{H}$  NMR (400 MHz,  $\text{CDCl}_3$ )  $\delta$  7.81 – 7.74 (m, 2H), 7.55 (d,  $J = 8.0$  Hz, 1H), 7.50 – 7.41 (m, 5H), 7.40 – 7.38 (m, 1H), 7.36 – 7.23 (m, 8H), 7.23 – 7.17 (m, 1H).  $^{13}\text{C}$  NMR (100 MHz,  $\text{CDCl}_3$ )  $\delta$  190.2, 182.3, 153.9, 146.4, 138.8, 136.7, 135.3, 133.7, 133.2, 133.1, 132.6, 132.0, 131.8, 130.4, 130.1, 129.7, 129.3, 129.0, 128.8, 128.4, 127.8, 127.1, 126.2, 124.7, 123.7, 120.5. HRMS  $m/z$  (APCI) calcd for  $\text{C}_{30}\text{H}_{19}\text{Br}_2\text{O}_3$  ( $\text{M}+\text{H}$ ) $^+$  584.9695 found 584.9691.

(3-benzoyl-5-phenyl-4-(thiophen-2-yl)furan-2-yl)(thiophen-2-yl)methanone (**3na**)

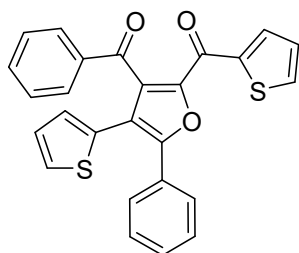

Yellow solid; m.p. 106-107 °C; (82.5 mg, yield: 75%);  $^1\text{H}$  NMR (400 MHz,  $\text{CDCl}_3$ )  $\delta$  8.29 (s, 1H), 7.93 (d,  $J = 7.5$  Hz, 2H), 7.74 – 7.69 (m, 3H), 7.55 – 7.51 (m, 1H), 7.43-7.41 (m, 5H), 7.27 – 7.21 (m, 2H), 7.01 (s, 1H), 6.96-6.95 (m, 1H).  $^{13}\text{C}$  NMR (100 MHz,  $\text{CDCl}_3$ )  $\delta$  191.0, 172.1, 153.5, 141.2, 146.8, 136.9, 135.7, 134.9, 134.5, 133.8, 130.3, 129.8, 129.4, 129.3, 128.9, 128.8, 128.7, 128.4, 127.6, 127.3, 127.2, 117.6. HRMS  $m/z$  (APCI) calcd for  $\text{C}_{26}\text{H}_{17}\text{S}_2\text{O}_3$  ( $\text{M}+\text{H}$ ) $^+$  441.0613 found 441.0611.

(3-benzoyl-5-phenyl-4-(thiophen-3-yl)furan-2-yl)(thiophen-3-yl)methanone (**3oa**)

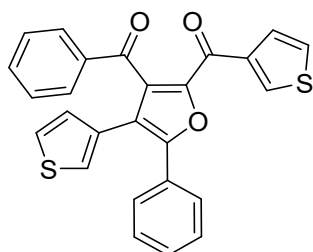

Yellow solid; m.p. 115-116 °C; (74.8 mg, yield: 68%); <sup>1</sup>H NMR (500 MHz, CDCl<sub>3</sub>) δ 8.60-8.59 (m, 1H), 7.93 – 7.91 (m, 2H), 7.78 – 7.77 (m, 1H), 7.64 – 7.62 (m, 2H), 7.54 (t, *J* = 7.4 Hz, 1H), 7.43 – 7.41 (m, 5H), 7.37 – 7.35 (m, 1H), 7.26 – 7.22 (m, 2H), 6.98 – 6.95 (m, 1H). <sup>13</sup>C NMR (125 MHz, CDCl<sub>3</sub>) δ 192.1, 174.3, 153.0, 148.1, 139.9, 137.3, 135.8, 134.8, 134.1, 130.4, 130.0, 129.7, 129.6, 129.3, 129.1, 128.8, 128.6, 127.4, 126.7, 126.3, 125.5, 119.9. HRMS *m/z* (APCI) calcd for C<sub>26</sub>H<sub>17</sub>S<sub>2</sub>O<sub>3</sub> (M+H)<sup>+</sup> 441.0613 found 441.0610.

(2-(1-naphthoyl)-4-(naphthalen-1-yl)-5-phenylfuran-3-yl)(phenyl)methanone (**3pa**)

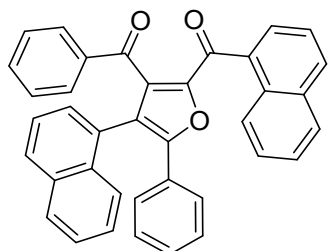

Yellow solid; m.p. 120-121 °C; (75.3 mg, yield: 57%); <sup>1</sup>H NMR (500 MHz, CDCl<sub>3</sub>) δ 8.23 – 8.10 (m, 1H), 7.91 – 7.69 (m, 6H), 7.50-7.34 (m, 11H), 7.23– 7.06 (m, 4H), 7.00-6.94 (m, 2H). <sup>13</sup>C NMR (125 MHz, CDCl<sub>3</sub>) δ 190.9, 184.1, 154.2, 148.7, 137.2, 137.0, 135.0, 134.1, 133.9, 133.2, 132.9, 132.3, 130.7, 129.8, 129.6, 129.4, 129.3, 129.1, 129.1, 128.9, 128.8, 128.5, 128.3, 128.6, 127.8, 127.1, 126.8, 126.7, 126.6, 125.9, 125.9, 125.8, 124.5, 122.9. HRMS *m/z* (APCI) calcd for C<sub>38</sub>H<sub>25</sub>O<sub>3</sub> (M+H)<sup>+</sup> 529.1798 found 529.1794.

(2-benzoyl-4-phenyl-5-(*p*-tolyl)furan-3-yl)(*p*-tolyl)methanone (**3ab**)

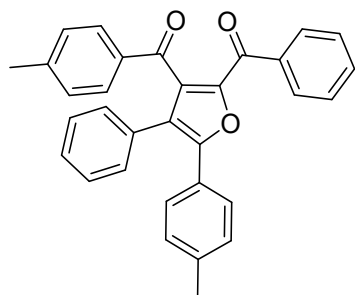

Yellow solid; m.p. 172-173 °C; (75.3 mg, yield: 66%); <sup>1</sup>H NMR (400 MHz, CDCl<sub>3</sub>) δ 8.12 (d, *J* = 7.9 Hz, 2H), 7.77 (d, *J* = 8.1 Hz, 2H), 7.57 (t, *J* = 7.4 Hz, 1H), 7.49 – 7.43

(m, 4H), 7.33 – 7.22 (m, 5H), 7.17 – 7.12 (m, 4H), 2.35 (d,  $J = 2.3$  Hz, 6H).  $^{13}\text{C}$  NMR (100 MHz,  $\text{CDCl}_3$ )  $\delta$  191.2, 181.1, 152.8, 147.5, 144.5, 139.6, 136.5, 136.2, 134.8, 132.8, 130.9, 129.8, 129.7, 129.5, 129.3, 128.8, 128.4, 128.2, 126.9, 126.5, 124.0, 21.8, 21.5. HRMS  $m/z$  (APCI) calcd for  $\text{C}_{32}\text{H}_{25}\text{O}_3$  ( $\text{M}+\text{H}$ ) $^+$  457.1798 found 457.1796.

(2-benzoyl-5-(4-methoxyphenyl)-4-phenylfuran-3-yl)(4-methoxyphenyl)methanone (**3ac**)

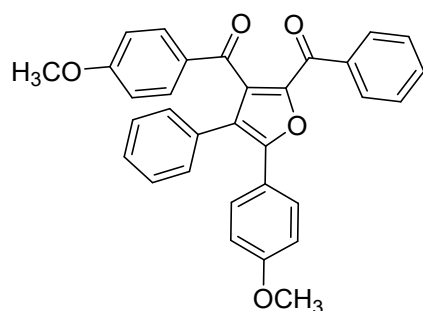

Yellow solid; m.p. 166-167 °C; (70.8 mg, yield: 58%);  $^1\text{H}$  NMR (400 MHz,  $\text{CDCl}_3$ )  $\delta$  8.12 (d,  $J = 7.4$  Hz, 2H), 7.58 (t,  $J = 7.4$  Hz, 1H), 7.48 (t,  $J = 7.6$  Hz, 2H), 7.44 – 7.38 (m, 2H), 7.34 – 7.22 (m, 8H), 7.19 – 7.17 (m, 1H), 7.07 – 7.01 (m, 2H), 6.90 – 6.87 (m, 1H), 3.78 (s, 3H), 3.62 (s, 3H).  $^{13}\text{C}$  NMR (100 MHz,  $\text{CDCl}_3$ )  $\delta$  191.9, 179.5, 163.6, 159.5, 152.0, 148.1, 137.2, 135.7, 133.5, 132.3, 130.9, 129.5, 129.2, 129.2, 129.1, 128.8, 128.6, 126.8, 124.1, 122.9, 114.4, 113.8, 55.56, 55.21. HRMS  $m/z$  (APCI) calcd for  $\text{C}_{32}\text{H}_{25}\text{O}_5$  ( $\text{M}+\text{H}$ ) $^+$  489.1696 found 489.1691.

(2-benzoyl-5-(4-chlorophenyl)-4-phenylfuran-3-yl)(4-chlorophenyl)methanone (**3ad**)

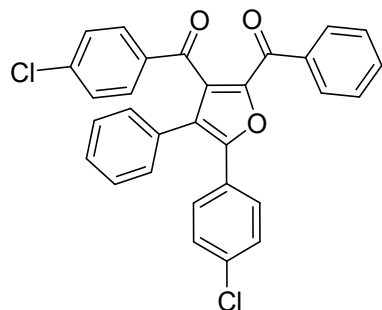

Yellow solid; m.p. 131-132 °C; 95.9 mg, yield: 77%);  $^1\text{H}$  NMR (400 MHz,  $\text{CDCl}_3$ )  $\delta$  8.12 – 8.05 (m, 2H), 7.79 (d,  $J = 8.6$  Hz, 2H), 7.60 (t,  $J = 7.4$  Hz, 1H), 7.52-7.46 (m, 4H), 7.37 – 7.23 (m, 10H).  $^{13}\text{C}$  NMR (100 MHz,  $\text{CDCl}_3$ )  $\delta$  190.0, 181.1, 151.5, 148.0,

140.1, 136.1, 135.5, 135.4, 135.4, 133.2, 130.5, 130.2, 129.8, 129.5, 129.2, 129.1, 129.0, 128.7, 128.6, 128.1, 127.5, 124.8. HRMS  $m/z$  (APCI) calculated for  $C_{30}H_{19}Cl_2O_3$  ( $M+H$ )<sup>+</sup> 497.0705 found 497.0703.

(2-benzoyl-5-(4-bromophenyl)-4-phenylfuran-3-yl)(4-bromophenyl)methanone (**3ae**)

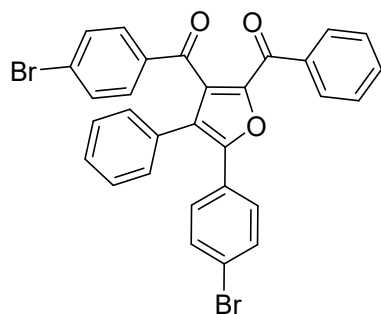

Yellow solid; m.p. 116-117 °C; (103.7 mg, yield: 71%); <sup>1</sup>H NMR (400 MHz, CDCl<sub>3</sub>) δ 8.11 – 8.09 (m, 2H), 7.71 (d,  $J$  = 8.6 Hz, 2H), 7.61 (t,  $J$  = 7.4 Hz, 1H), 7.52 – 7.45 (m, 6H), 7.40 – 7.38 (m, 2H), 7.32 – 7.25 (m, 5H). <sup>13</sup>C NMR (100 MHz, CDCl<sub>3</sub>) δ 190.2, 181.1, 151.5, 148.0, 136.1, 135.8, 135.3, 133.3, 132.1, 132.0, 130.5, 130.2, 129.8, 129.5, 129.1, 129.0, 128.7, 128.6, 128.3, 128.0, 124.9, 123.8. HRMS  $m/z$  (APCI) calcd for  $C_{30}H_{19}Br_2O_3$  ( $M+H$ )<sup>+</sup> 584.9695 found 584.9693.

(2-benzoyl-4-phenyl-5-(*m*-tolyl)furan-3-yl)(*m*-tolyl)methanone (**3af**)

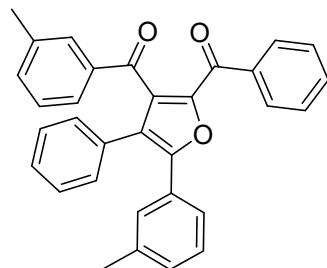

Yellow solid; m.p. 118-119 °C; (71.9 mg, yield: 63%); <sup>1</sup>H NMR (500 MHz, CDCl<sub>3</sub>) δ 8.13 – 8.09 (m, 2H), 7.69 (s, 1H), 7.63 (d,  $J$  = 7.7 Hz, 1H), 7.59 (t,  $J$  = 7.4 Hz, 1H), 7.48 (t,  $J$  = 7.7 Hz, 2H), 7.40 (s, 1H), 7.34 – 7.28 (m, 7H), 7.24 – 7.16 (m, 3H), 2.33 (s, 3H), 2.30 (s, 3H). <sup>13</sup>C NMR (125 MHz, CDCl<sub>3</sub>) δ 192.1, 181.6, 153.1, 148.1, 138.9, 138.7, 137.5, 136.9, 136.4, 134.9, 133.3, 131.2, 130.6, 130.2, 130.1, 129.8, 129.5, 129.2, 129.0, 128.8, 128.7, 127.9, 127.1, 124.9, 124.6, 21.91, 21.71. HRMS  $m/z$  (APCI) calcd for  $C_{32}H_{25}O_3$  ( $M+H$ )<sup>+</sup> 457.1798 found 457.1796.

(2-benzoyl-5-(3-methoxyphenyl)-4-phenylfuran-3-yl)(3-methoxyphenyl)methanone  
**(3ag)**

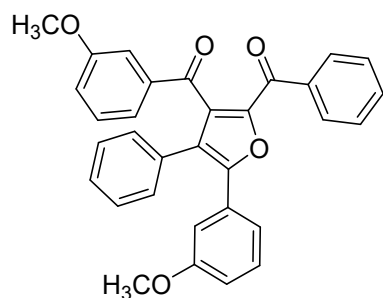

Yellow solid; m.p. 126-127 °C; (73.2 mg, yield: 60%); <sup>1</sup>H NMR (400 MHz, CDCl<sub>3</sub>) δ 7.90 (d, *J* = 8.2 Hz, 2H), 7.81 (d, *J* = 7.6 Hz, 1H), 7.63 – 7.59 (m, 3H), 7.51 (t, *J* = 7.4 Hz, 1H), 7.42 – 7.34 (m, 6H), 7.20 (t, *J* = 7.9 Hz, 1H), 7.15 – 7.12 (m, 1H), 6.91 (d, *J* = 6.9 Hz, 1H), 6.88 – 6.79 (m, 2H), 3.82 (s, 3H), 3.63 (s, 3H). <sup>13</sup>C NMR (100 MHz, CDCl<sub>3</sub>) δ 191.2, 181.1, 159.8, 159.6, 152.3, 138.5, 136.4, 133.0, 130.70, 130.30, 129.90, 129.8, 129.8, 129.6, 128.9, 128.5, 128.4, 124.8, 122.5, 120.5, 119.3, 115.7, 112.5, 111.8, 55.4, 55.1. HRMS *m/z* (APCI) calcd for C<sub>32</sub>H<sub>25</sub>O<sub>5</sub> (M+H)<sup>+</sup> 489.1696 found 489.1691.

(2-benzoyl-5-(3-chlorophenyl)-4-phenylfuran-3-yl)(3-chlorophenyl)methanone **(3ah)**

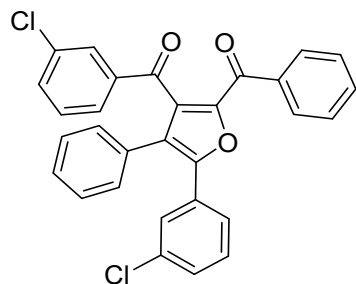

Yellow solid; m.p. 114-115 °C; (91.8 mg, yield: 74%); <sup>1</sup>H NMR (400 MHz, CDCl<sub>3</sub>) δ 8.13 – 8.07 (m, 2H), 7.80 – 7.79 (m, 1H), 7.71 (d, *J* = 7.8 Hz, 1H), 7.62 (t, *J* = 7.4 Hz, 1H), 7.56 – 7.55 (m, 1H), 7.53 – 7.45 (m, 3H), 7.39 – 7.37 (m, 1H), 7.35 – 7.30 (m, 5H), 7.30 – 7.22 (m, 4H). <sup>13</sup>C NMR (100 MHz, CDCl<sub>3</sub>) δ 189.9, 181.2, 151.0, 148.2, 138.5, 136.0, 135.1, 135.0, 134.9, 133.6, 133.3, 130.7, 130.1, 123.0, 129.8, 129.5, 129.5, 129.1, 128.9, 128.8, 128.6, 127.3, 126.7, 125.3, 124.9. HRMS *m/z* (APCI) calculated for C<sub>30</sub>H<sub>19</sub>Cl<sub>2</sub>O<sub>3</sub> (M+H)<sup>+</sup> 497.0705 found 497.0707.



(2-benzoyl-5-(3-bromophenyl)-4-phenylfuran-3-yl)(3-bromophenyl)methanone (**3ai**)

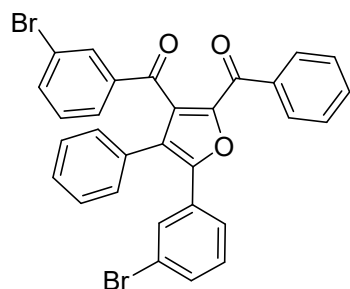

Yellow solid; m.p. 148-149 °C; (105.1 mg, yield: 72%); <sup>1</sup>H NMR (400 MHz, CDCl<sub>3</sub>) δ 8.09 (d, *J* = 7.4 Hz, 2H), 7.95 (s, 1H), 7.77 – 7.69 (m, 2H), 7.64-7.60 (m, 2H), 7.534 – 7.47 (m, 3H), 7.42 (d, *J* = 7.9 Hz, 1H), 7.34 – 7.32 (m, 3H), 7.29 – 7.26 (m, 3H), 7.18 (t, *J* = 8.0 Hz, 1H). <sup>13</sup>C NMR (100 MHz, CDCl<sub>3</sub>) δ 189.8, 181.2, 150.8, 138.7, 136.5, 136.0, 135.0, 133.3, 132.4, 131.8, 130.9, 130.3, 130.2, 129.9, 129.8, 129.6, 129.5, 129.1, 128.8, 128.6, 127.7, 125.4, 125.3, 123.0, 122.9. HRMS *m/z* (APCI) calcd for C<sub>30</sub>H<sub>19</sub>Br<sub>2</sub>O<sub>3</sub> (M+H)<sup>+</sup> 584.9695 found 584.9693.

(2-benzoyl-5-(2-chlorophenyl)-4-phenylfuran-3-yl)(2-chlorophenyl)methanone (**3aj**)

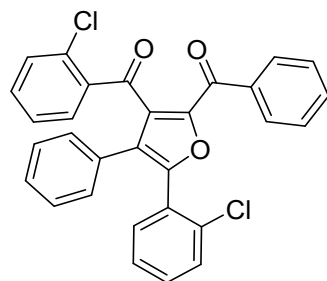

Yellow solid; m.p. 145-146 °C; (24.8 mg, yield: 20%); <sup>1</sup>H NMR (500 MHz, CDCl<sub>3</sub>) δ 8.08 (d, *J* = 7.7 Hz, 2H), 7.79 (d, *J* = 7.7 Hz, 1H), 7.59 – 7.53 (m, 1H), 7.52 – 7.48 (m, 1H), 7.48 – 7.42 (m, 2H), 7.38 – 7.31 (m, 4H), 7.27 – 7.20 (m, 8H). <sup>13</sup>C NMR (125 MHz, CDCl<sub>3</sub>) δ 190.3, 182.1, 151.2, 149.7, 136.9, 136.4, 135.1, 134.7, 133.8, 133.6, 133.5, 132.9, 132.5, 131.6, 131.5, 130.8, 130.6, 130.3, 129.9, 128.9, 128.8, 128.4, 127.4, 127.2, 127.1. HRMS *m/z* (APCI) calculated for C<sub>30</sub>H<sub>19</sub>Cl<sub>2</sub>O<sub>3</sub> (M+H)<sup>+</sup> 497.0705 found 497.0704.

(5-benzoyl-3-phenyl-[2,2'-bifuran]-4-yl)(furan-2-yl)methanone (**3al**)

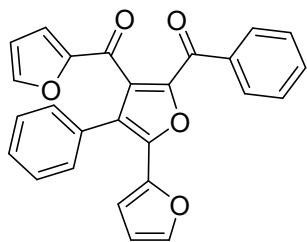

Yellow solid; m.p. 136-137 °C; (53.1 mg, yield: 52%); <sup>1</sup>H NMR (400 MHz, CDCl<sub>3</sub>) δ 8.12 (d, *J* = 7.3 Hz, 2H), 7.59 (t, *J* = 7.4 Hz, 1H), 7.51 – 7.46 (m, 4H), 7.42 – 7.39 (m, 2H), 7.36 – 7.33 (m, 3H), 7.05 – 7.04 (m, 1H), 6.56 – 6.56 (m, 1H), 6.44 – 6.43 (m, 2H). <sup>13</sup>C NMR (100 MHz, CDCl<sub>3</sub>) δ 181.3, 177.9, 152.9, 147.3, 144.6, 144.3, 143.8, 136.3, 133.1, 129.8, 129.8, 129.7, 128.6, 128.5, 123.6, 119.6, 112.6, 111.8, 110.7. HRMS *m/z* (APCI) calcd for C<sub>26</sub>H<sub>17</sub>O<sub>5</sub> (M+H)<sup>+</sup> 409.1070 found 409.1067.

(2-benzoyl-4-phenyl-5-(thiophen-2-yl)furan-3-yl)(thiophen-2-yl)methanone (**3am**)

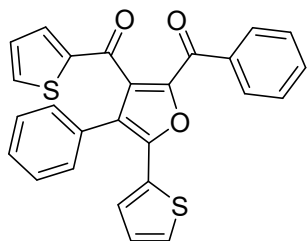

Yellow solid; m.p. 121-122 °C; (72.6 mg, yield: 66%); <sup>1</sup>H NMR (400 MHz, CDCl<sub>3</sub>) δ 8.16 – 8.07 (m, 2H), 7.62 – 7.55 (m, 2H), 7.55 – 7.52 (m, 1H), 7.49 (t, *J* = 7.6 Hz, 2H), 7.42 – 7.39 (m, 2H), 7.38 – 7.33 (m, 3H), 7.33 – 7.30 (m, 1H), 7.28 – 7.25 (m, 1H), 7.01 – 6.98 (m, 2H). <sup>13</sup>C NMR (100 MHz, CDCl<sub>3</sub>) δ 182.8, 181.0, 148.6, 147.3, 144.4, 136.4, 135.3, 135.0, 134.3, 133.1, 131.0, 130.0, 129.8, 129.7, 128.9, 128.8, 128.5, 128.2, 127.8, 127.6, 127.0, 123.4. HRMS *m/z* (APCI) calcd for C<sub>26</sub>H<sub>17</sub>O<sub>3</sub>S<sub>2</sub> (M+H)<sup>+</sup> 441.0613 found 441.0609.

(4-phenyl-5-(*p*-tolyl)furan-2,3-diyl)bis(phenylmethanone) (**3an**)/ (2-benzoyl-4,5-diphenylfuran-3-yl)(*p*-tolyl)methanone (**3an'**)

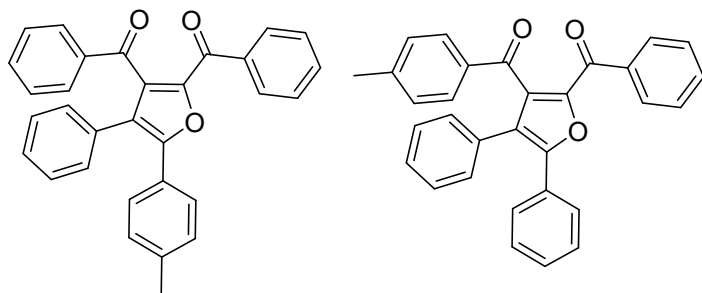

White solid; (75.2 mg, yield: 68%);  $^1\text{H}$  NMR (400 MHz,  $\text{CDCl}_3$ )  $\delta$  8.16 – 8.07 (m, 4H), 7.87 (d,  $J = 7.5$  Hz, 2H), 7.77 (d,  $J = 8.2$  Hz, 2H), 7.58-7.54 (m, 4H), 7.49 – 7.43 (m, 7H), 7.37 – 7.25 (m, 14H), 7.17 – 7.12 (m, 4H), 2.34 (d,  $J = 2.8$  Hz, 6H).  $^{13}\text{C}$  NMR (100 MHz, Chloroform-d)  $\delta$  191.7, 191.2, 181.2, 181.1, 152.9, 147.7, 147.6, 144.6, 139.7, 137.1, 136.5, 136.0, 134.7, 133.6, 133.0, 132.9, 130.8, 130.8, 129.9, 129.8, 129.7, 129.7, 129.5, 129.4, 129.3, 129.3, 129.2, 128.9, 128.88, 128.8, 128.6, 128.5, 128.4, 128.3, 126.9, 126.91, 126.4, 124.0, 21.8, 21.5. HRMS  $m/z$  (APCI) calcd for  $\text{C}_{31}\text{H}_{23}\text{O}_3$  ( $\text{M}+\text{H}$ ) $^+$  443.1641 found 443.1639.

(4,5-bis(4-chlorophenyl)furan-2,3-diyl)bis((4-chlorophenyl)methanone) (**3dd**)

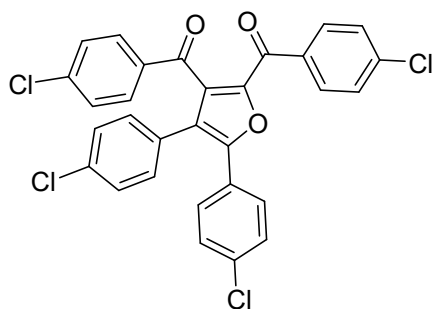

White solid; m.p. 146-147 °C; (102.9 mg, yield: 73%);  $^1\text{H}$  NMR (400 MHz,  $\text{CDCl}_3$ )  $\delta$  8.06 (d,  $J = 8.6$  Hz, 2H), 7.79 (d,  $J = 8.5$  Hz, 2H), 7.49 (d,  $J = 8.6$  Hz, 2H), 7.44 (d,  $J = 8.6$  Hz, 2H), 7.38-7.33 (m, 4H), 7.29 (d,  $J = 8.4$  Hz, 2H), 7.20 (d,  $J = 8.5$  Hz, 2H).  $\delta^{13}\text{C}$  NMR (125 MHz,  $\text{CDCl}_3$ )  $\delta$  190.1, 180.0, 152.2, 140.9, 140.3, 136.3, 135.8, 135.5, 135.3, 134.6, 131.5, 131.2, 130.8, 129.9, 129.7, 129.5, 129.4, 128.9, 128.5, 127.4, 124.0. HRMS  $m/z$  (APCI) calcd for  $\text{C}_{30}\text{H}_{17}\text{Cl}_4\text{O}_3$  ( $\text{M}+\text{H}$ ) $^+$  564.9927 found 564.9923.

(4,5-bis(4-bromophenyl)furan-2,3-diyl)bis((4-bromophenyl)methanone) (**3ee**)

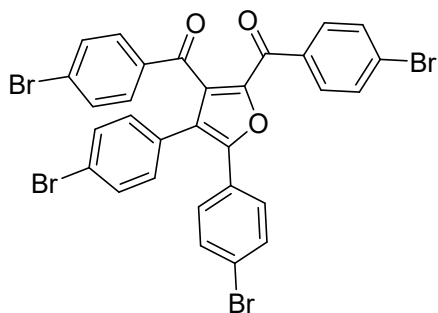

White solid; m.p. 141-142 °C; (114.7 mg, yield: 62%);  $^1\text{H}$  NMR (500 MHz,  $\text{CDCl}_3$ )  $\delta$  7.97 (d,  $J = 8.5$  Hz, 2H), 7.71 (d,  $J = 8.5$  Hz, 2H), 7.66 (d,  $J = 8.5$  Hz, 2H), 7.54 (d,  $J = 8.5$  Hz, 2H), 7.51 (d,  $J = 8.5$  Hz, 2H), 7.45 (d,  $J = 8.3$  Hz, 2H), 7.37 (d,  $J = 8.6$  Hz, 2H), 7.14 (d,  $J = 8.3$  Hz, 2H).  $^{13}\text{C}$  NMR (125 MHz,  $\text{CDCl}_3$ )  $\delta$  190.3, 180.2, 152.3, 148.2, 135.9, 135.7, 135.0, 132.9, 132.7, 132.6, 132.4, 131.6, 131.4, 130.9, 129.8, 129.4, 129.1, 128.7, 127.9, 124.7, 124.1, 123.6. HRMS  $m/z$  (APCI) calcd for  $\text{C}_{30}\text{H}_{17}\text{Br}_4\text{O}_3$  ( $\text{M}+\text{H}$ ) $^+$  740.7905 found 740.7901.

(3-(4-(9H-carbazol-9-yl)benzoyl)-5-(4-(9H-carbazol-9-yl)phenyl)-4-phenylfuran-2-yl)(phenyl)methanone (**4**)

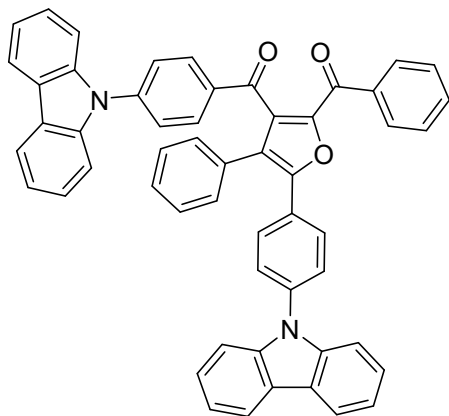

Yellow solid; m.p. 124-125 °C; (44.0 mg, yield: 58%);  $^1\text{H}$  NMR (400 MHz,  $\text{CDCl}_3$ )  $\delta$  8.22 (d,  $J = 7.3$  Hz, 2H), 8.17 – 8.10 (m, 6H), 7.83 (d,  $J = 8.5$  Hz, 2H), 7.64 (d,  $J = 8.3$  Hz, 3H), 7.61 – 7.55 (m, 4H), 7.48 (d,  $J = 8.2$  Hz, 6H), 7.46 – 7.40 (m, 7H), 7.32 (t,  $J = 7.3$  Hz, 4H).  $^{13}\text{C}$  NMR (100 MHz,  $\text{DMSO}-d_6$ )  $\delta$  190.2, 181.4, 151.8, 148.1, 142.6, 140.4, 140.1, 138.7, 136.4, 135.8, 135.4, 133.3, 130.9, 130.5, 129.9, 129.8, 129.2, 128.8, 128.7, 128.2, 127.8, 127.0, 126.3, 126.2, 126.1, 125.0, 123.9, 123.7, 120.7, 120.5, 110.0, 109.8. HRMS  $m/z$  (APCI) calcd for  $\text{C}_{54}\text{H}_{35}\text{N}_2\text{O}_3$  ( $\text{M}+\text{H}$ ) $^+$  759.2642 found 759.2638.

(4,5-di([1,1'-biphenyl]-4-yl)furan-2,3-diyl)bis([1,1'-biphenyl]-4-ylmethanone) (**5**)

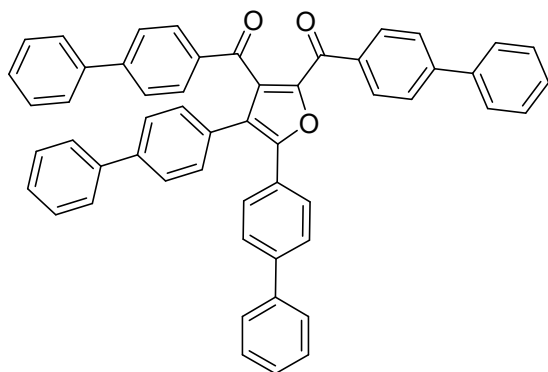

Yellow solid; m.p. 115-116 °C; (52.7 mg, yield: 72%);  $^1\text{H}$  NMR (400 MHz,  $\text{CDCl}_3$ )  $\delta$  8.27 (d,  $J = 8.2$  Hz, 2H), 8.01 (d,  $J = 8.2$  Hz, 2H), 7.77 – 7.69 (m, 4H), 7.66 (d,  $J = 7.4$  Hz, 2H), 7.51 – 7.56 (m, 11H), 7.49-7.32 (m, 15H).  $^{13}\text{C}$  NMR (100 MHz,  $\text{CDCl}_3$ )  $\delta$  191.2, 180.6, 152.5, 148.1, 146.3, 145.8, 142.1, 141.07, 140.3, 140.0, 139.94, 139.9, 136.1, 136.0, 135.1, 130.6, 130.1, 129.8, 129.7, 129.0, 128.99, 128.9, 128.86, 128.4, 128.3, 128.1, 127.9, 127.7, 127.6, 127.5, 127.4, 127.37, 127.2, 127.0, 127.03, 124.4. HRMS  $m/z$  (APCI) calcd for  $\text{C}_{54}\text{H}_{37}\text{O}_3$  ( $\text{M}+\text{H}$ ) $^+$  733.2737 found 733.2733.

1,4-diphenylbuta-1,3-diyne (**A**)

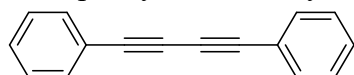

$^1\text{H}$  NMR (400 MHz,  $\text{CDCl}_3$ )  $\delta$  7.55 – 7.47 (m, 4H), 7.37-7.29 (m, 6H).  $^{13}\text{C}$  NMR (100 MHz,  $\text{CDCl}_3$ )  $\delta$  132.6, 129.3, 128.5, 121.8, 81.6, 74.0.

## Copies of $^1\text{H}$ and $^{13}\text{C}$ Spectra

### (4,5-diphenylfuran-2,3-diyl)bis(phenylmethanone) (**3aa**)

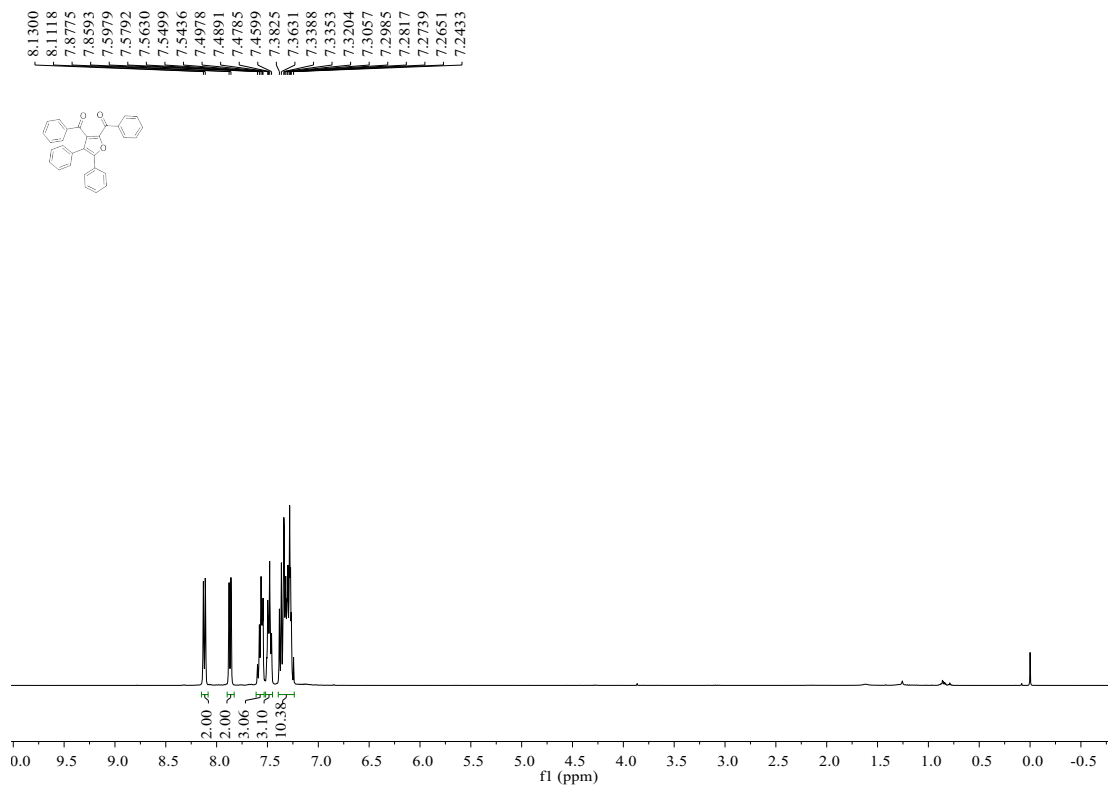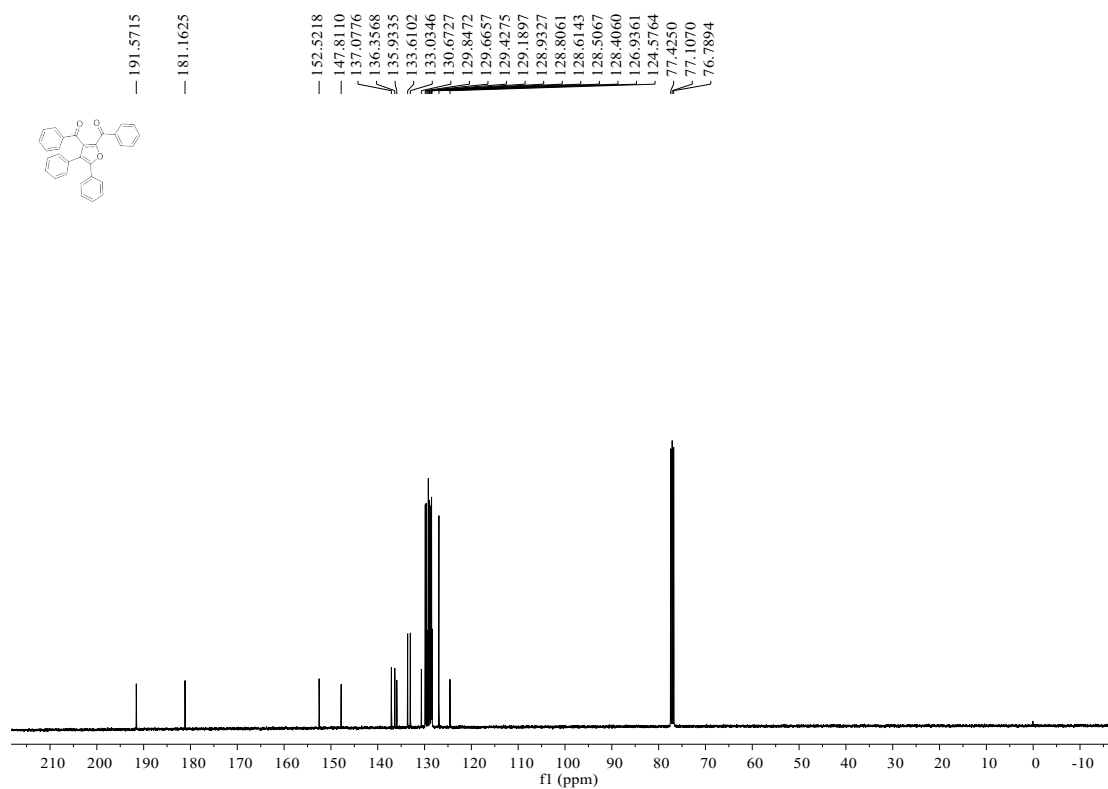

# (3-benzoyl-5-phenyl-4-(p-tolyl)furan-2-yl)(p-tolyl)methanone (**3ba**)

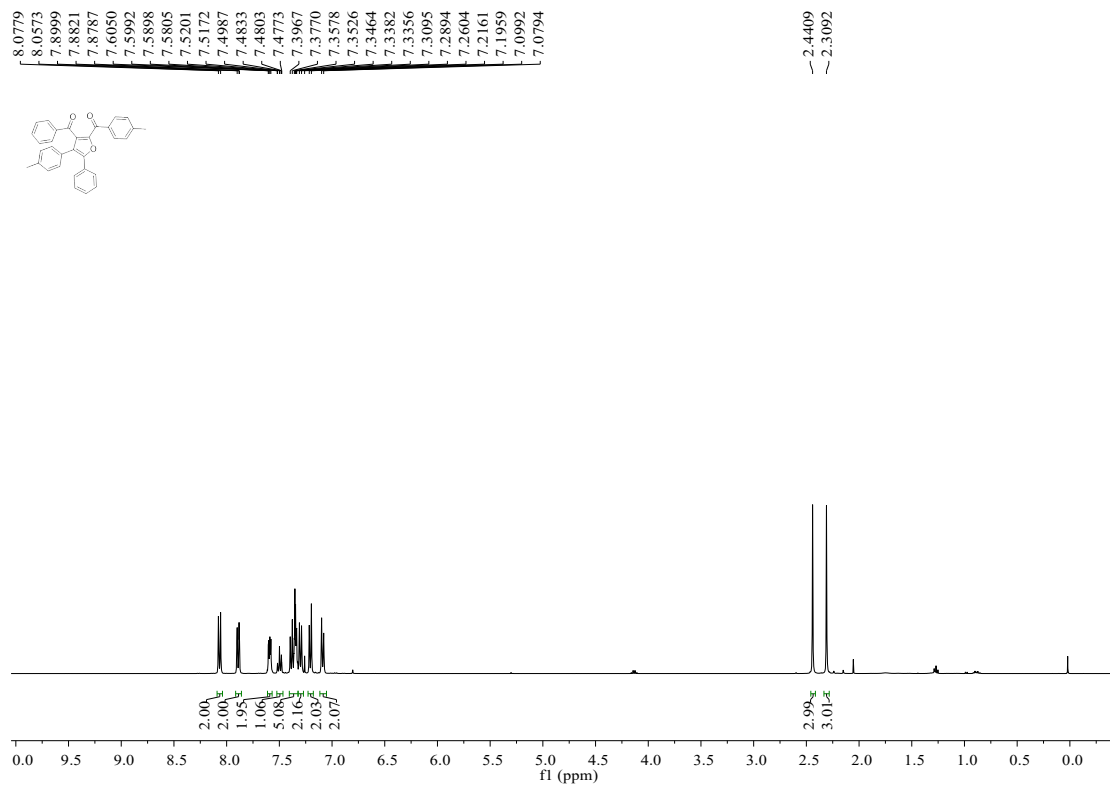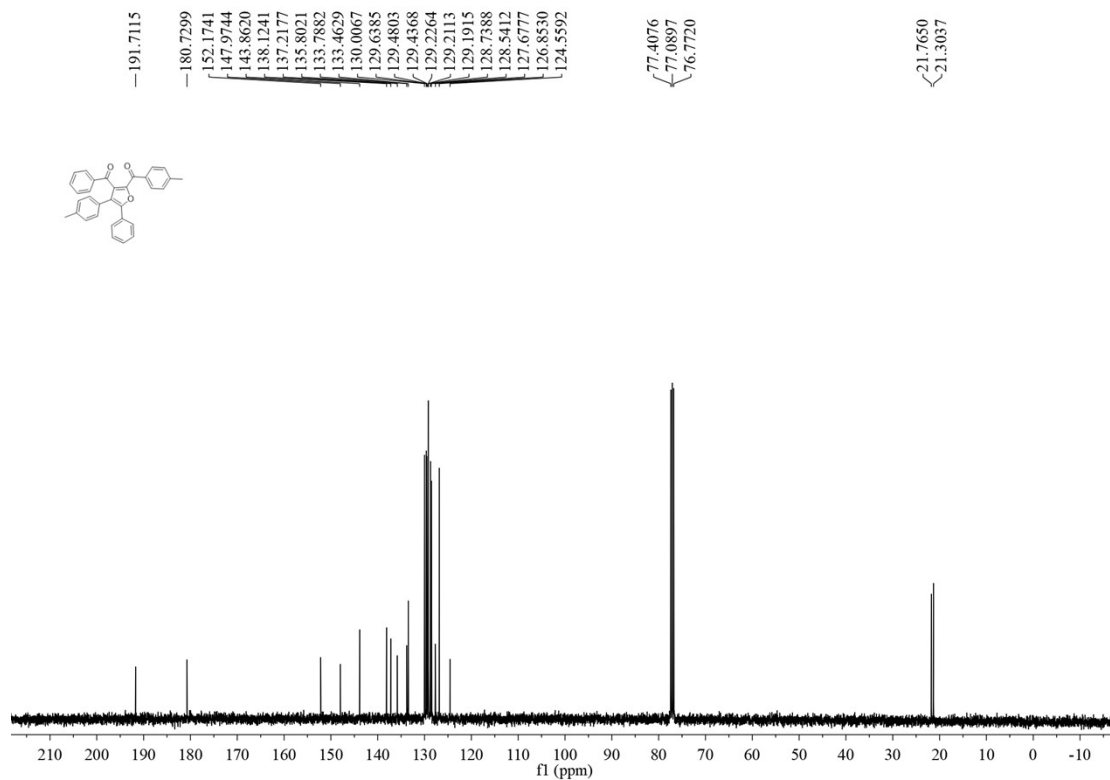

(3-benzoyl-4-(4-methoxyphenyl)-5-phenylfuran-2-yl)(4-methoxyphenyl)methanone ( **3ca**)

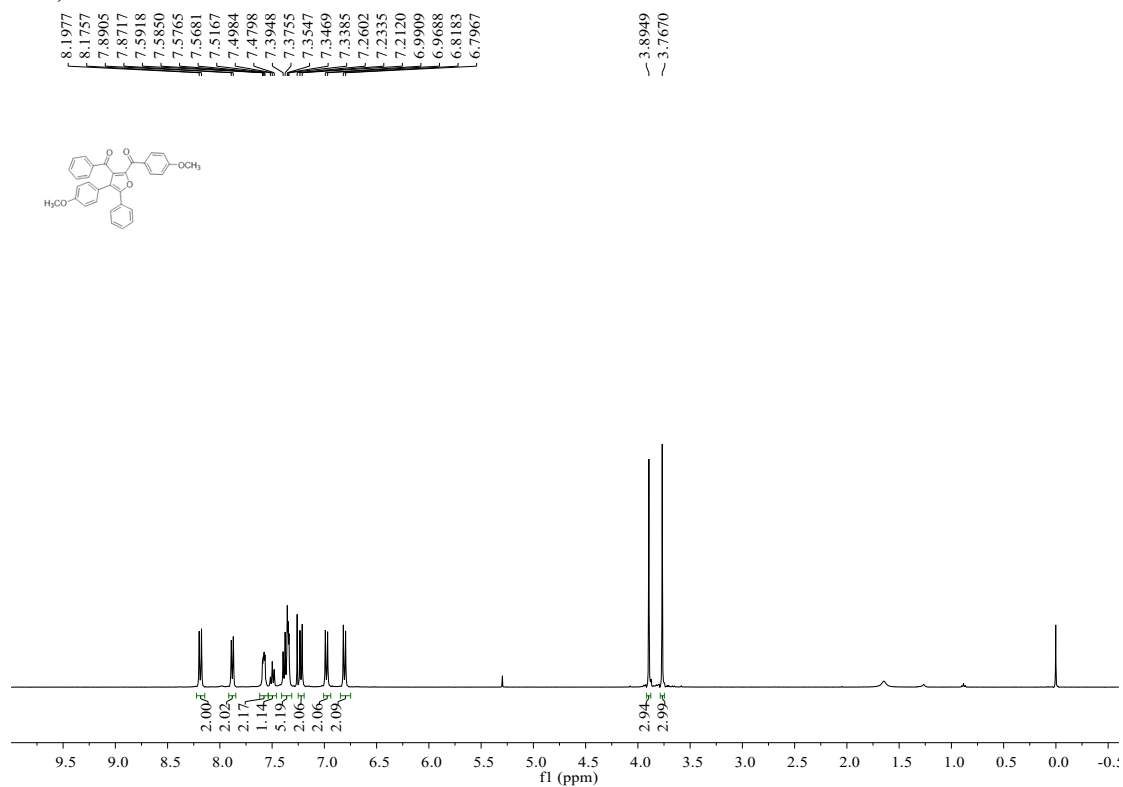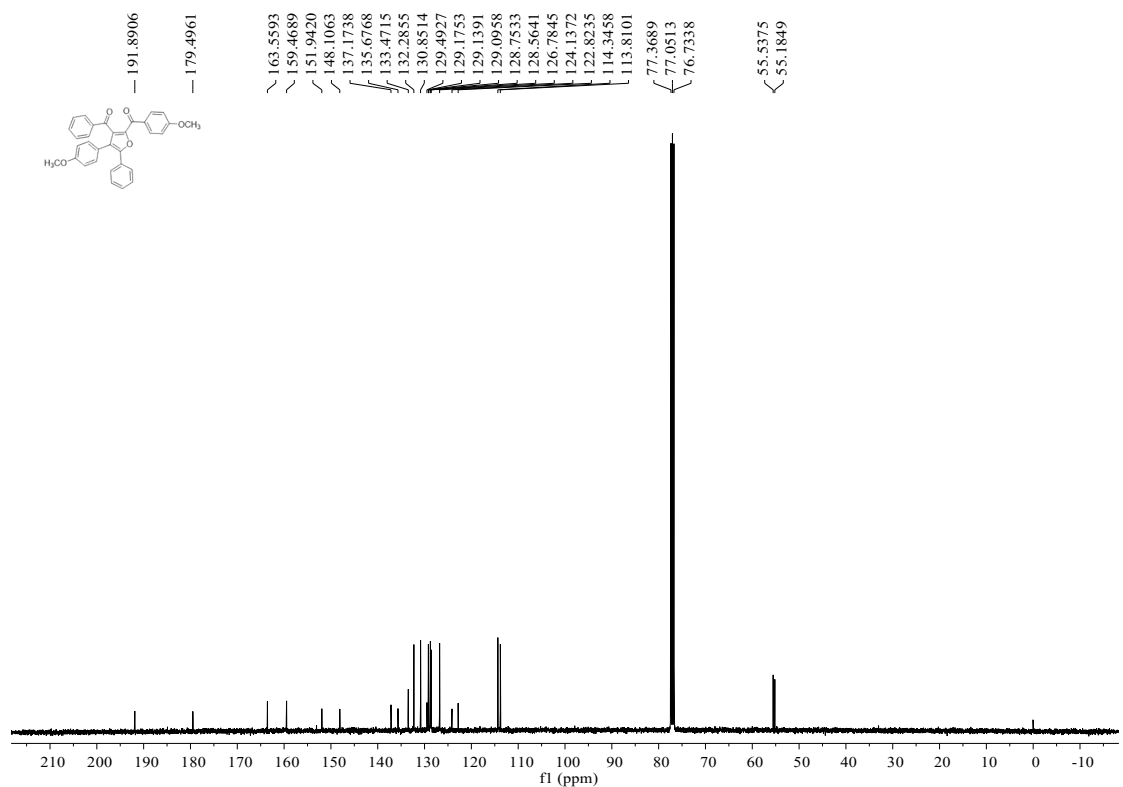



(3-benzoyl-4-(4-chlorophenyl)-5-phenylfuran-2-yl)(4-chlorophenyl)methanone (**3da**)

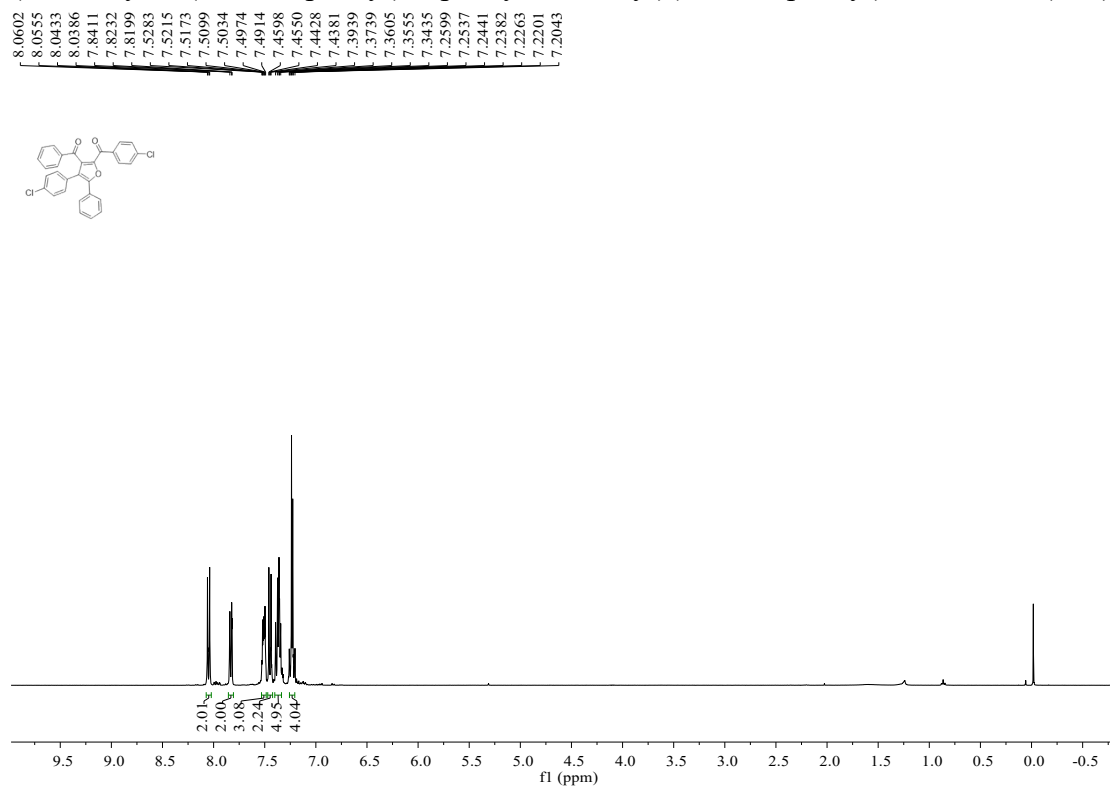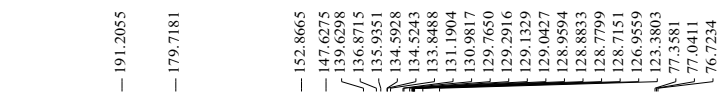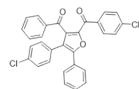

(3-benzoyl-4-(4-bromophenyl)-5-phenylfuran-2-yl)(4-bromophenyl)methanone (**3ea**)

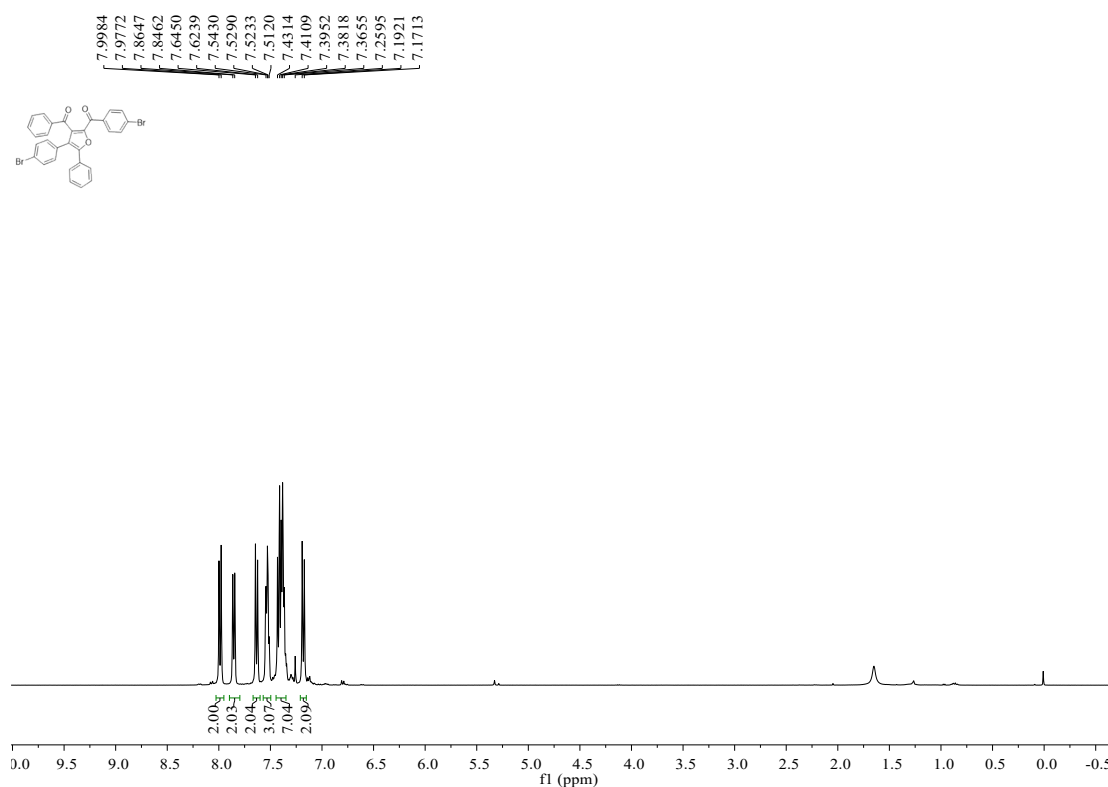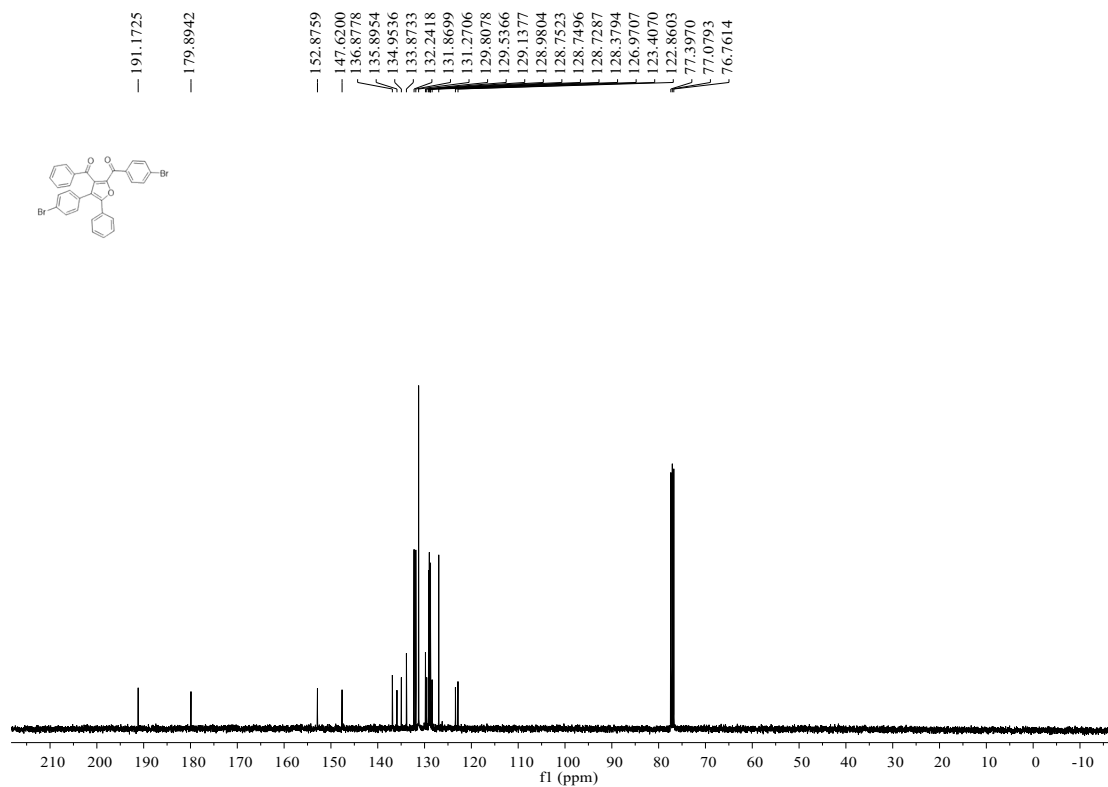

(3-benzoyl-4-(4-nitrophenyl)-5-phenylfuran-2-yl)(4-nitrophenyl)methanone (**3fa**)

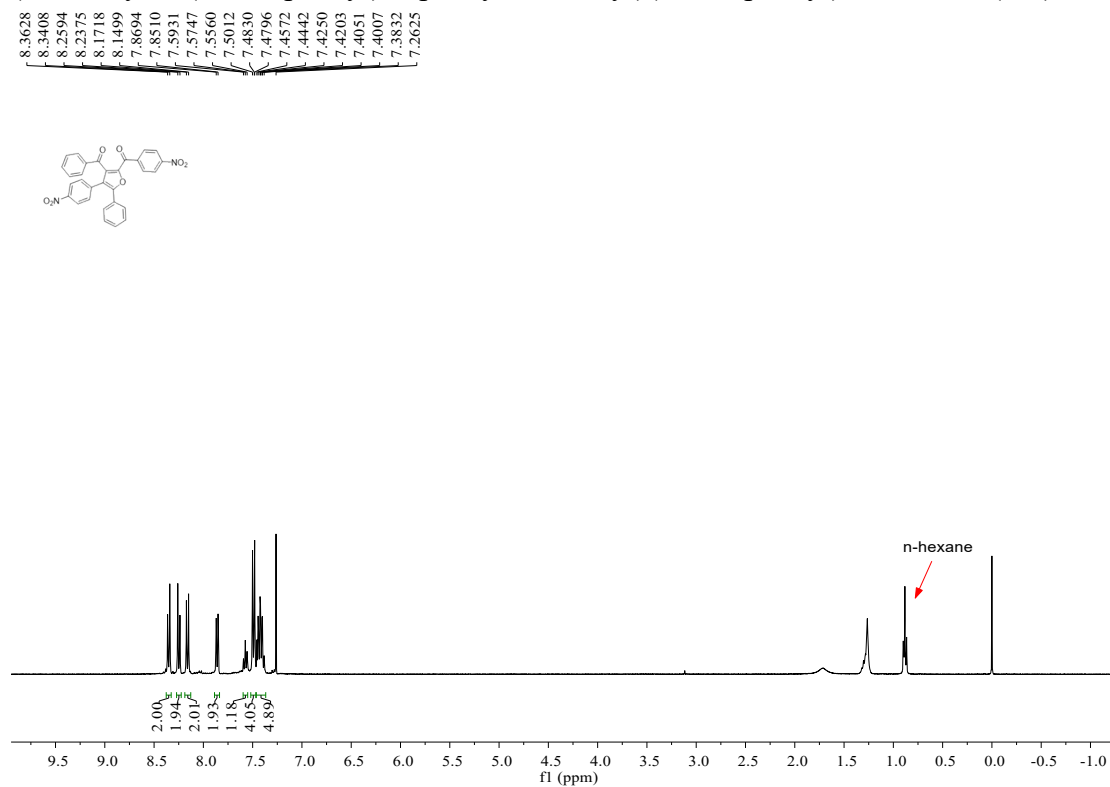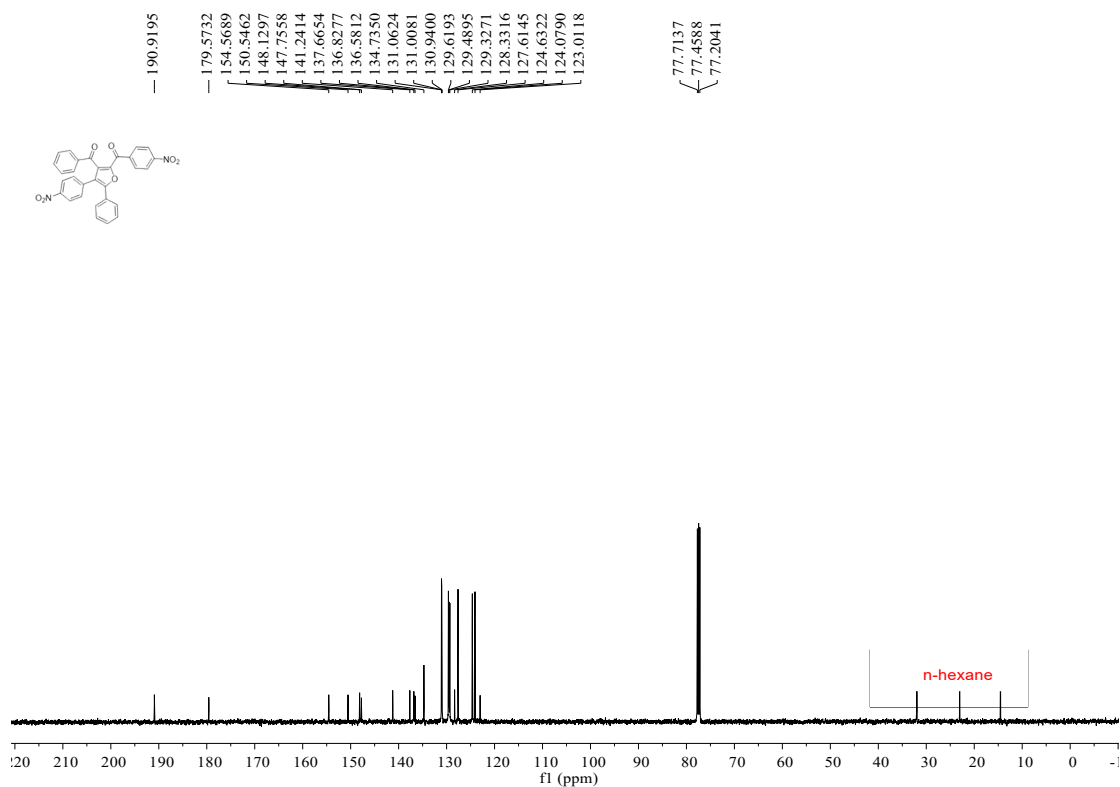

(3-benzoyl-5-phenyl-4-(m-tolyl)furan-2-yl)(m-tolyl)methanone (**3ga**)

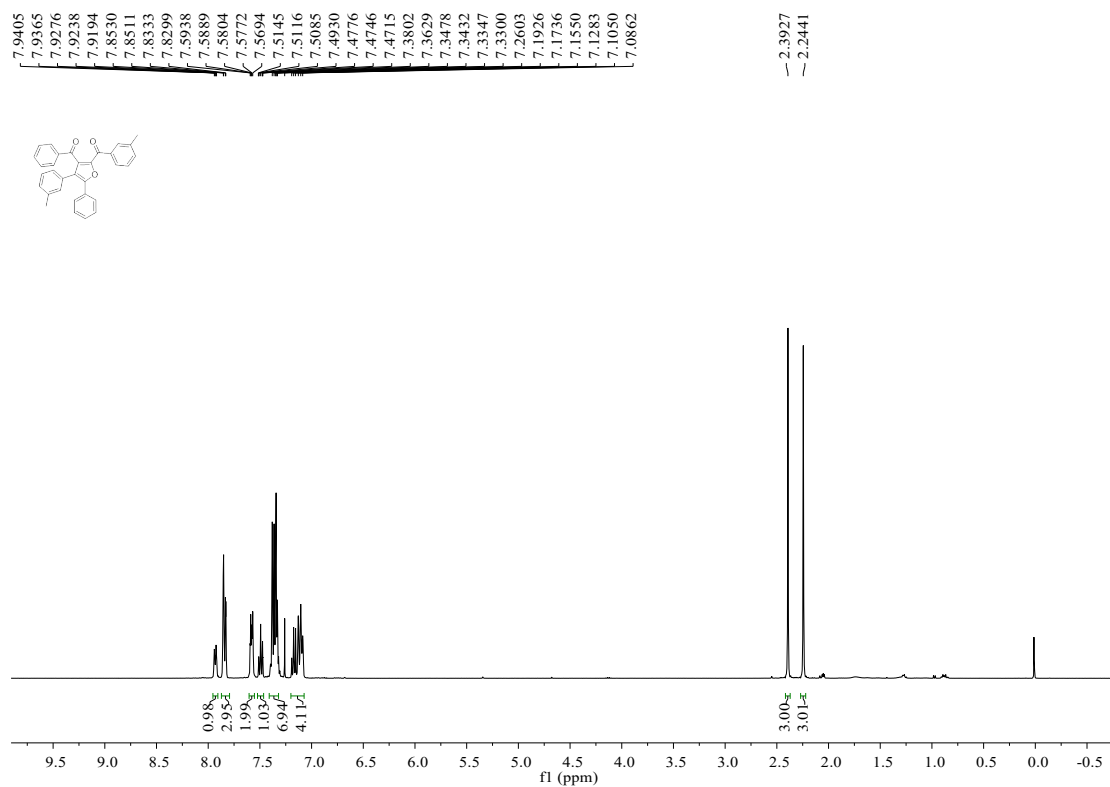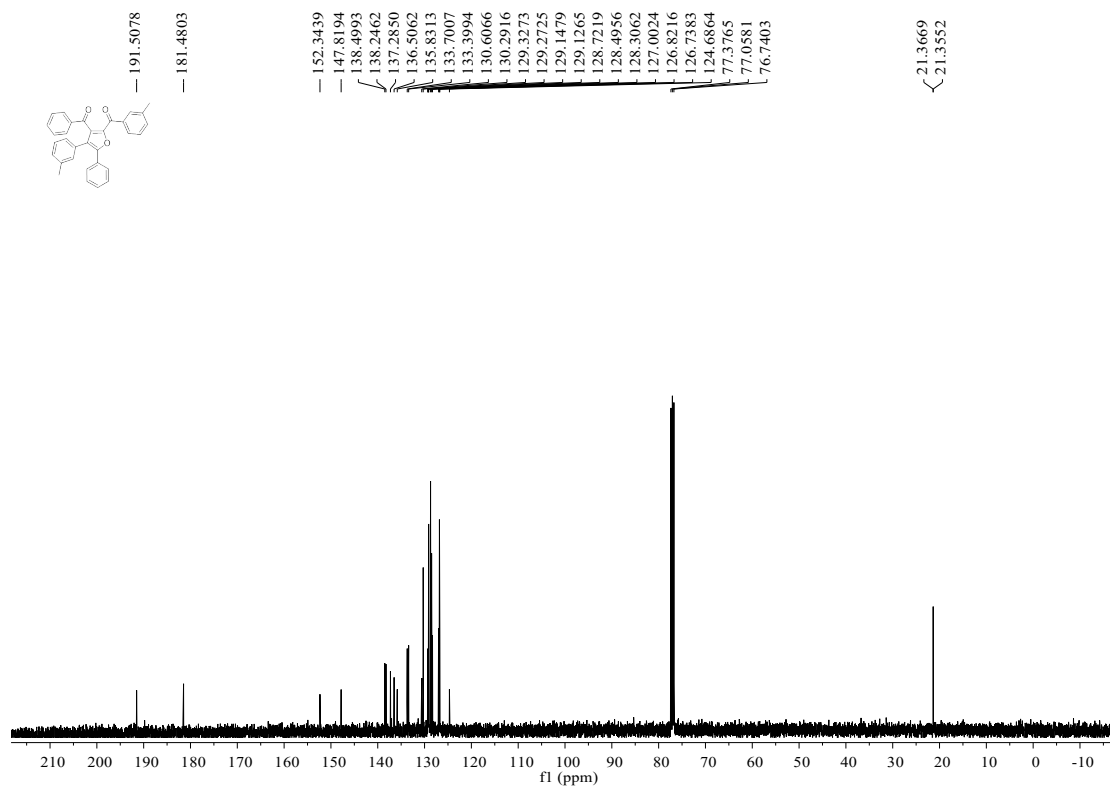

(3-benzoyl-4-(3-methoxyphenyl)-5-phenylfuran-2-yl)(3-methoxyphenyl)methanone  
**(3ha)**

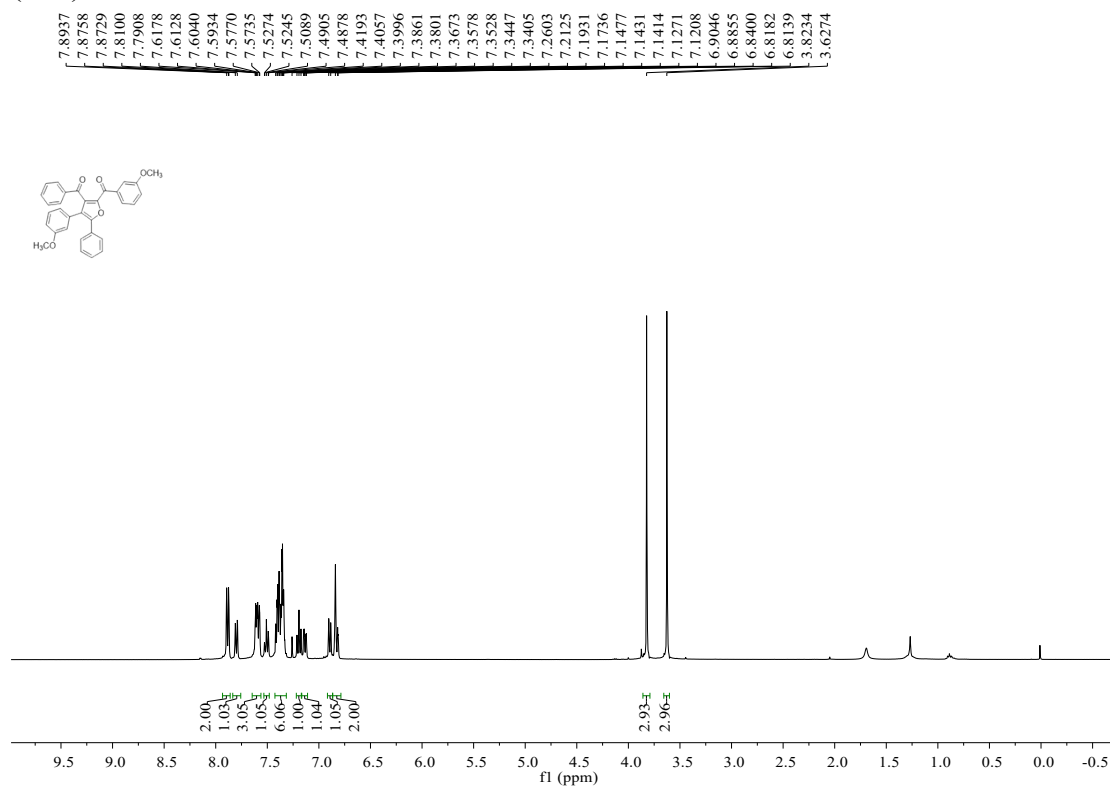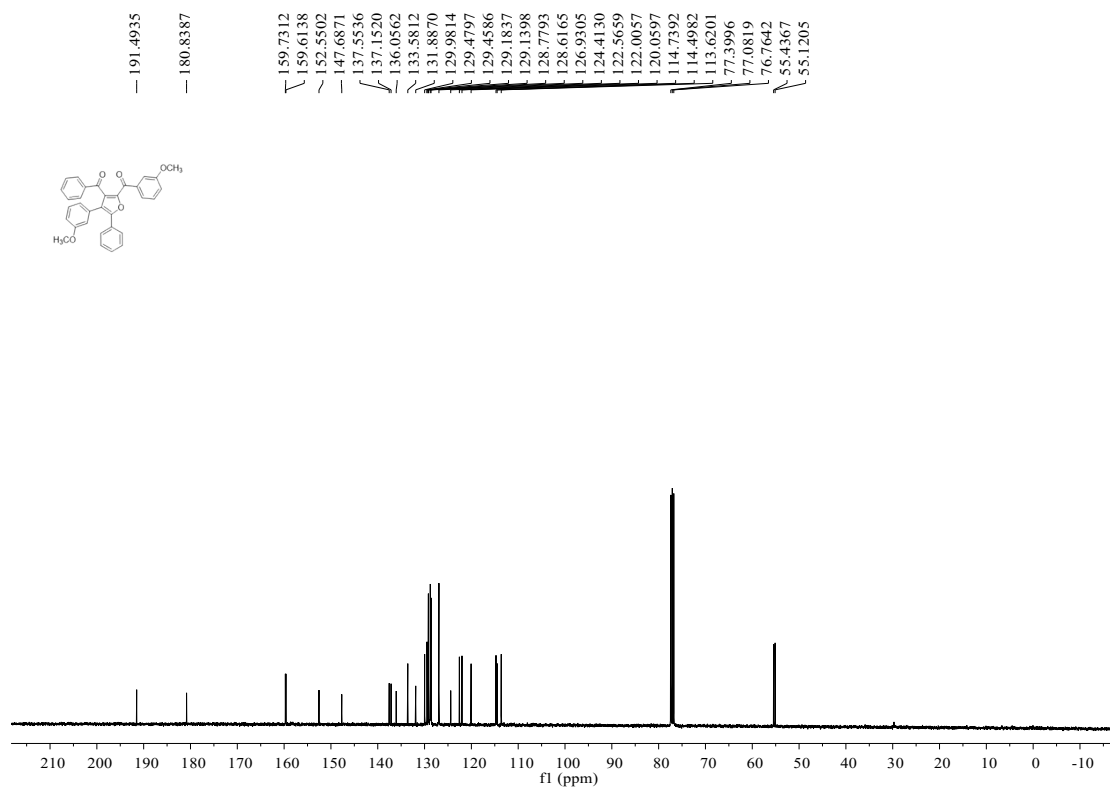

(3-benzoyl-4-(3-chlorophenyl)-5-phenylfuran-2-yl)(3-chlorophenyl)methanone (**3ia**)

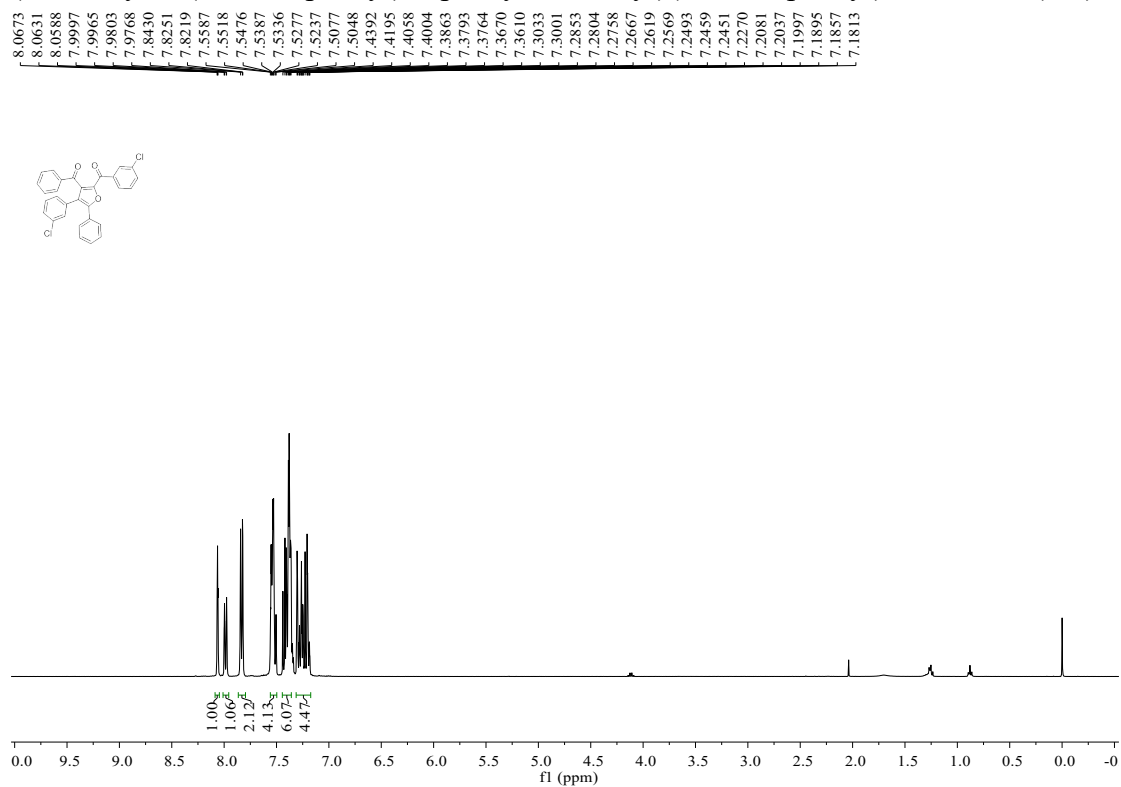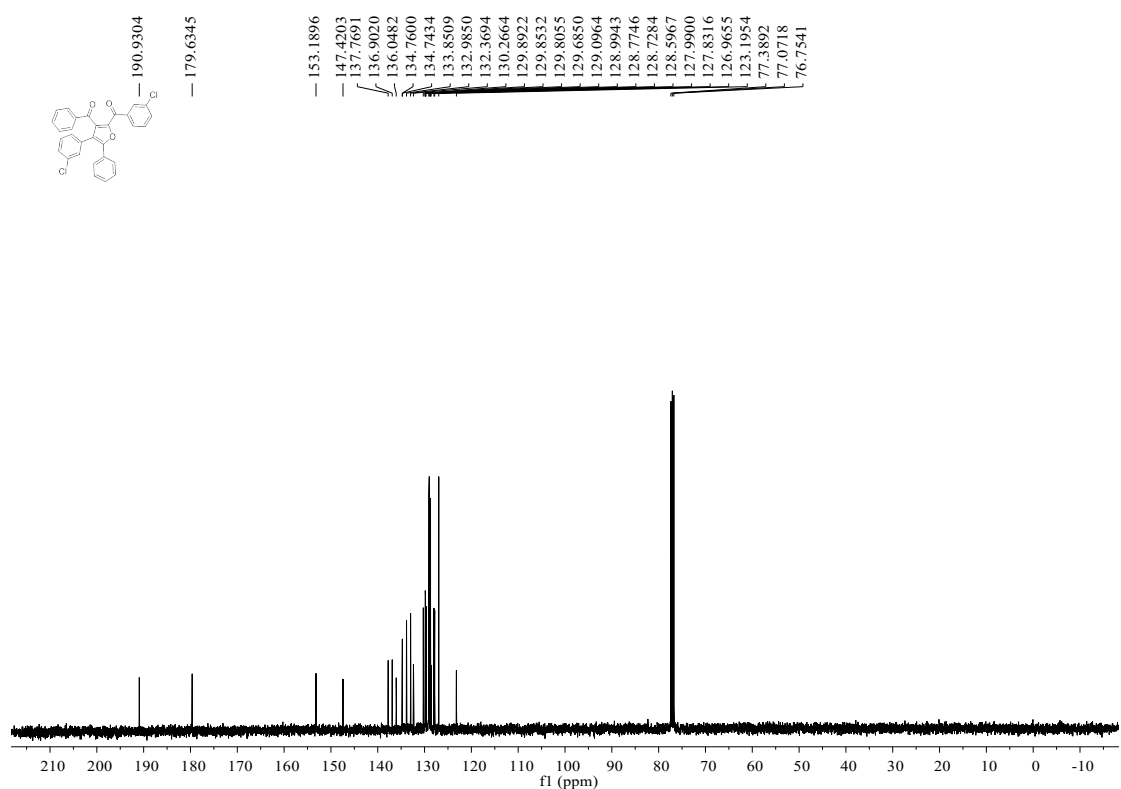

(3-benzoyl-4-(3-bromophenyl)-5-phenylfuran-2-yl)(3-bromophenyl)methanone (**3ja**)

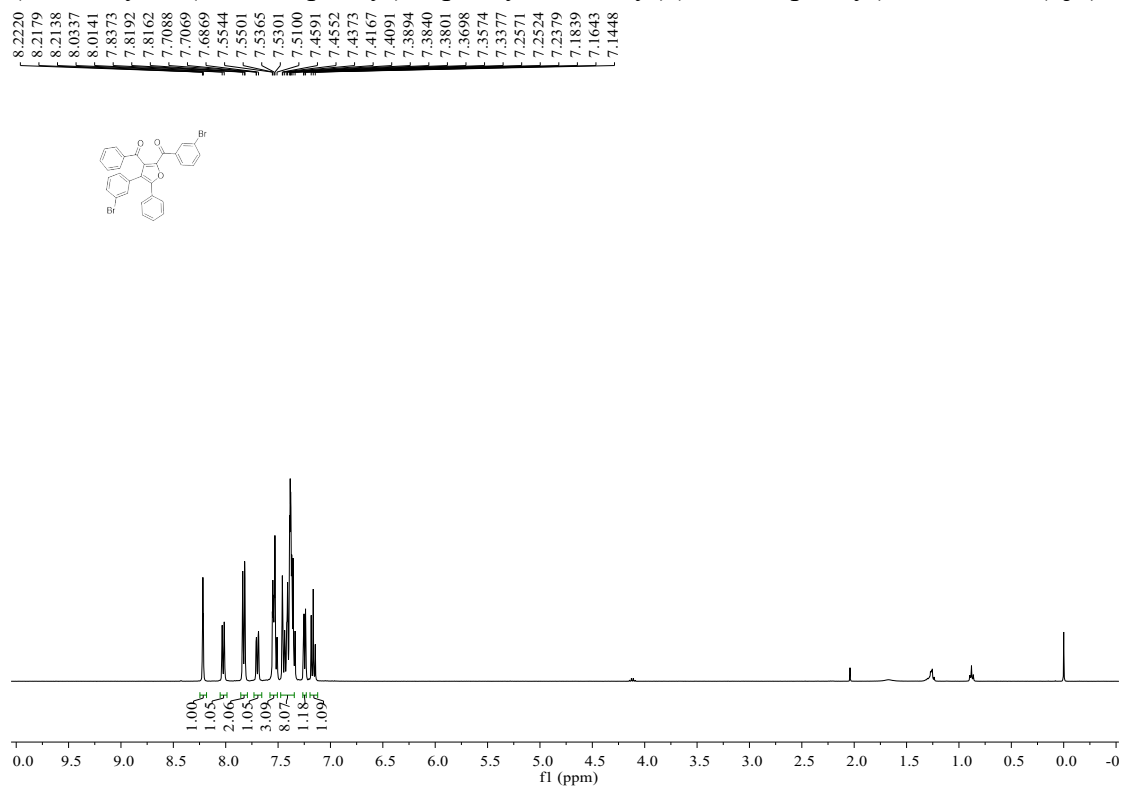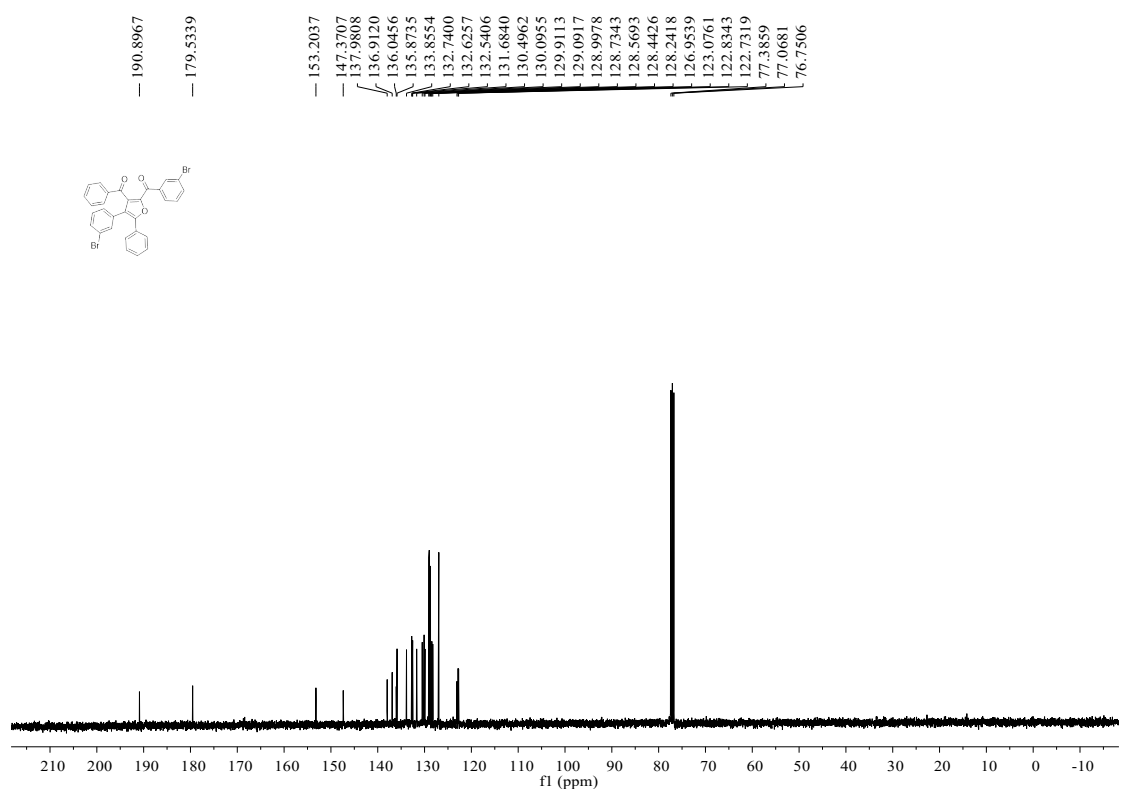

(3-benzoyl-5-phenyl-4-(o-tolyl)furan-2-yl)(o-tolyl)methanone (**3ka**)

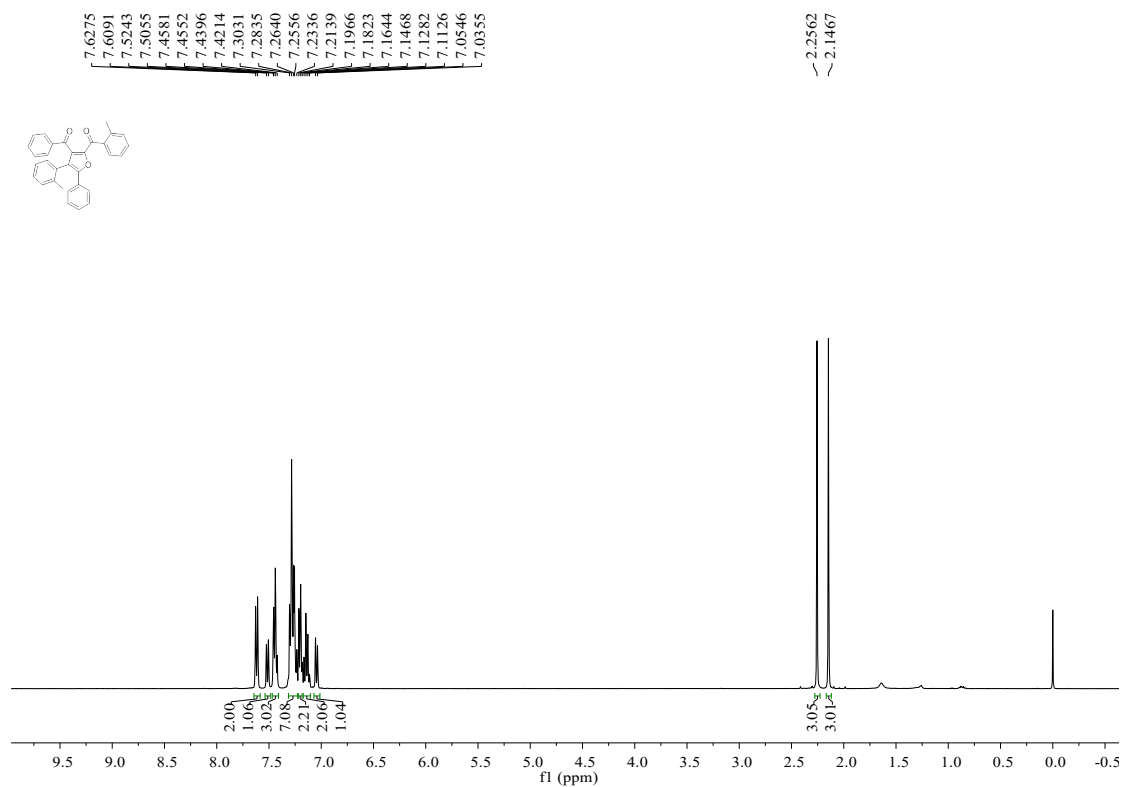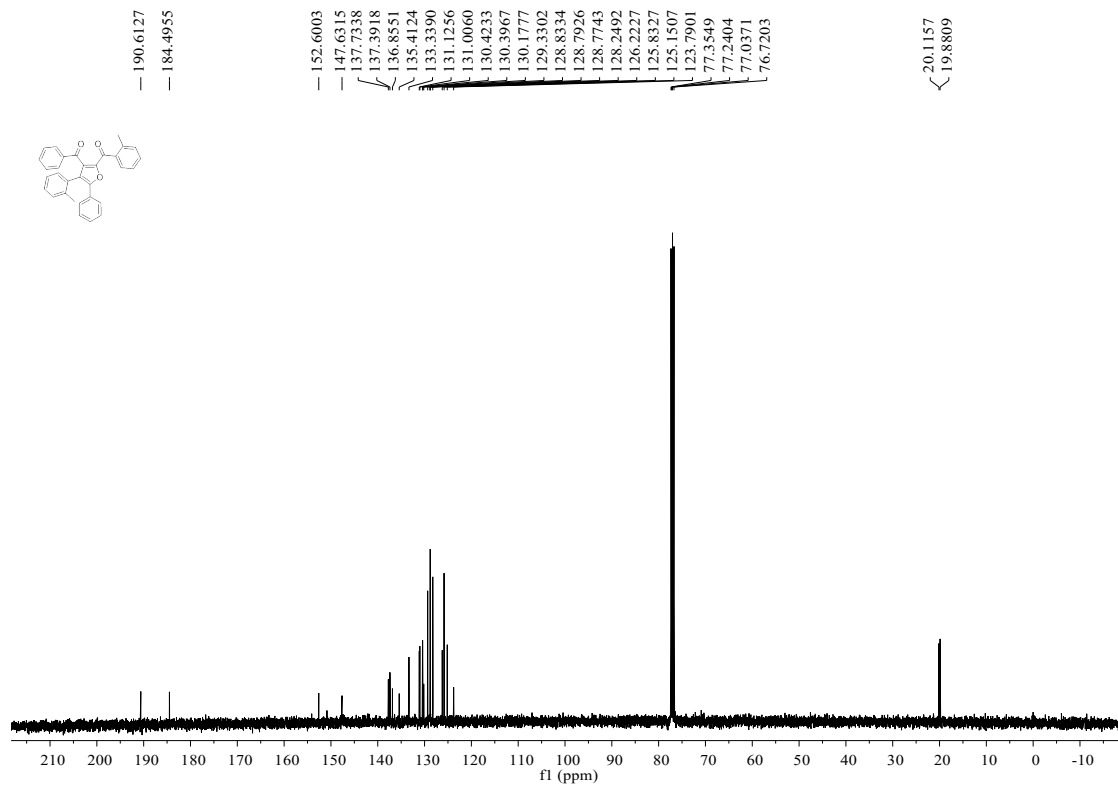



(3-benzoyl-4-(2-chlorophenyl)-5-phenylfuran-2-yl)(2-chlorophenyl)methanone (**31a**)

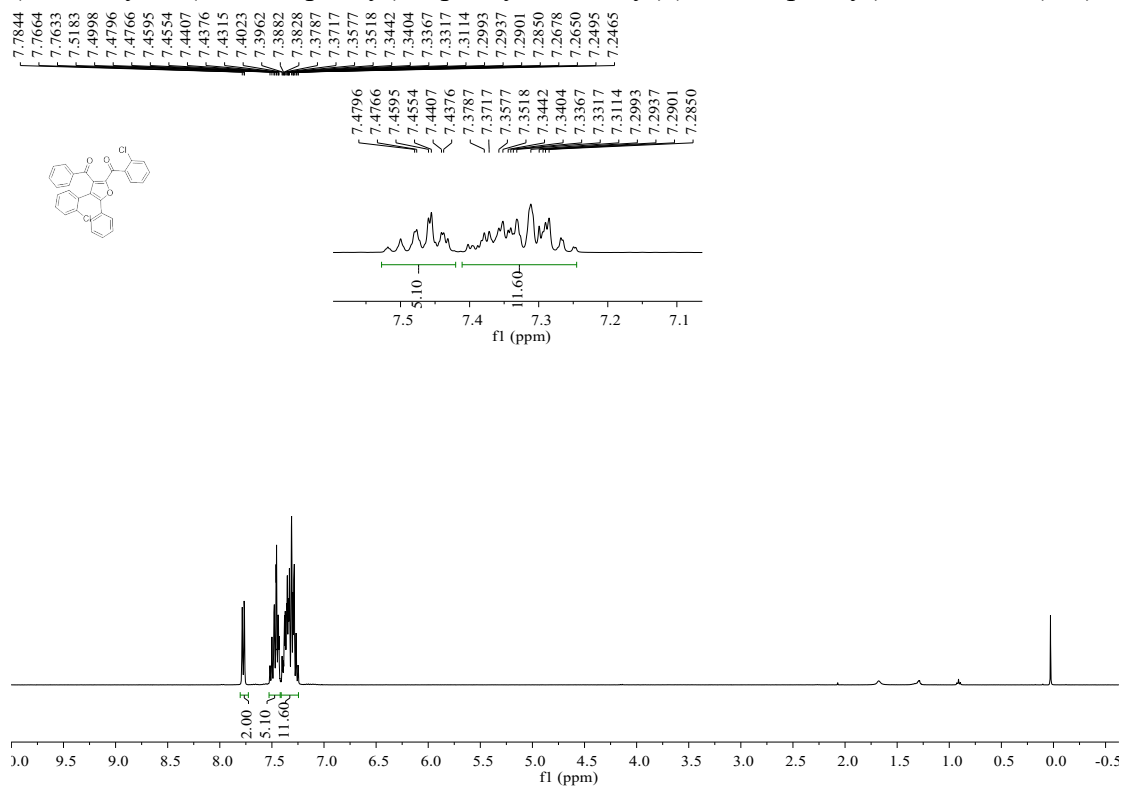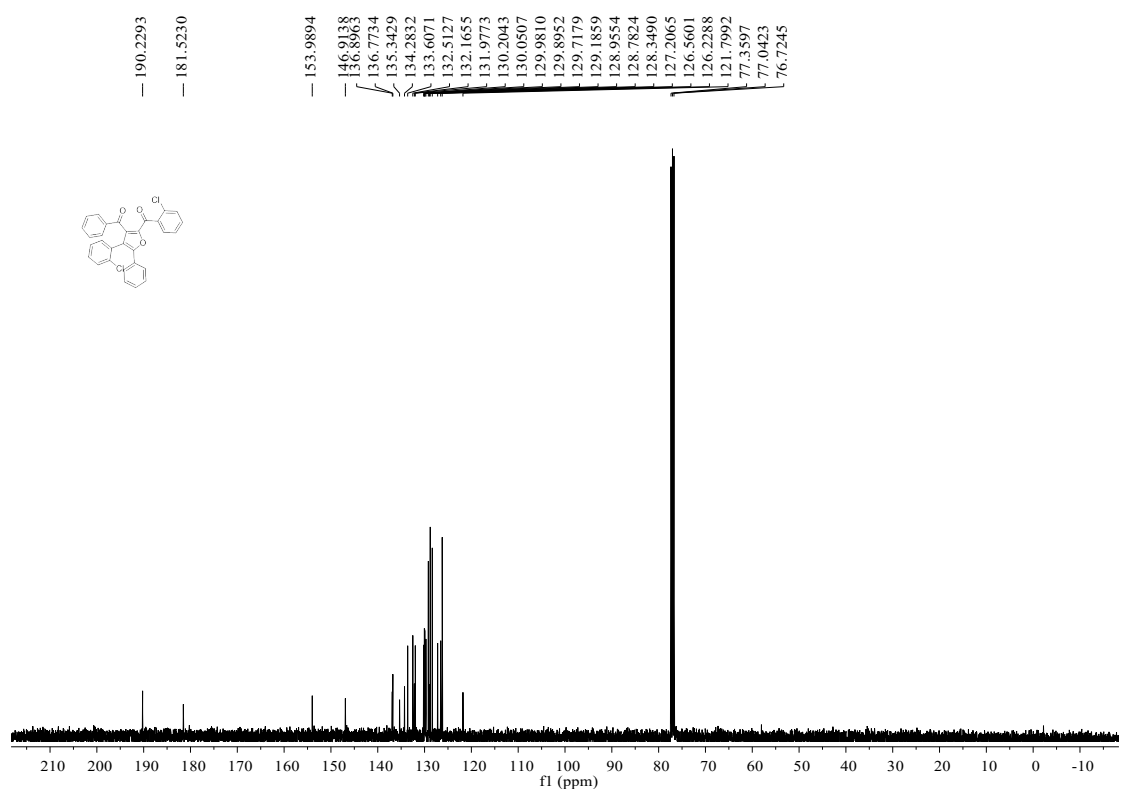

(3-benzoyl-4-(2-bromophenyl)-5-phenylfuran-2-yl)(2-bromophenyl)methanone (**3ma**)

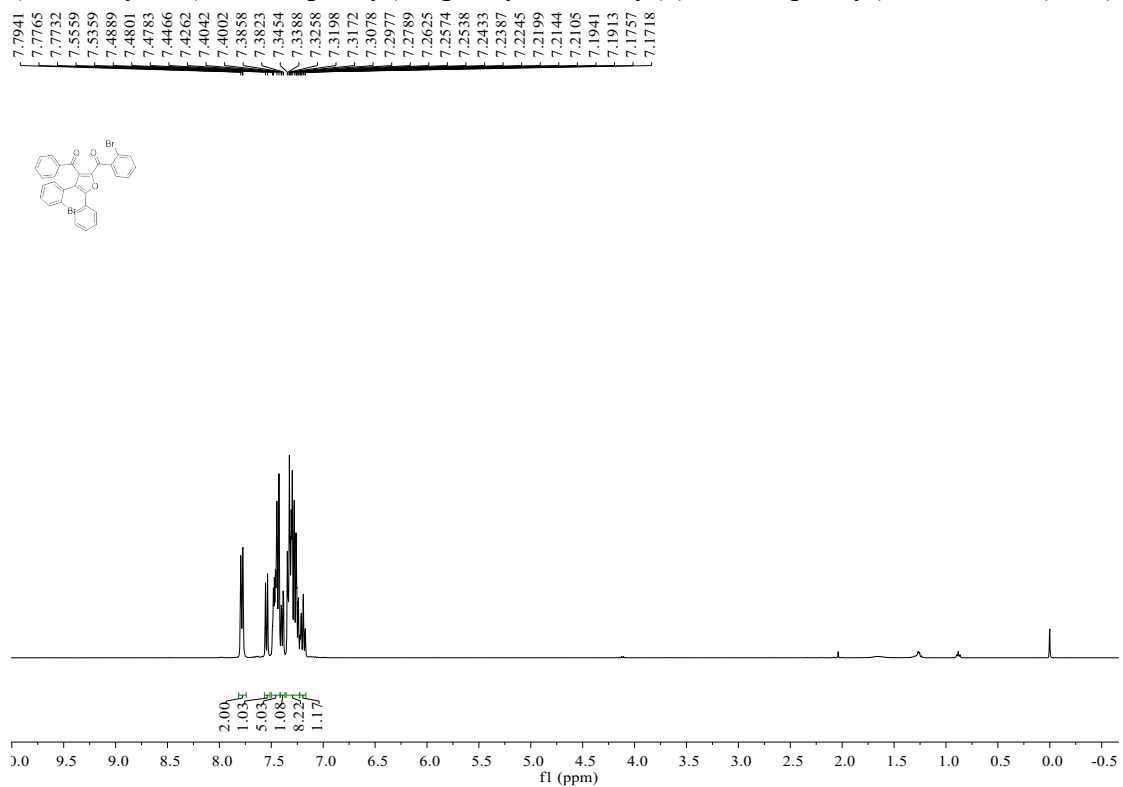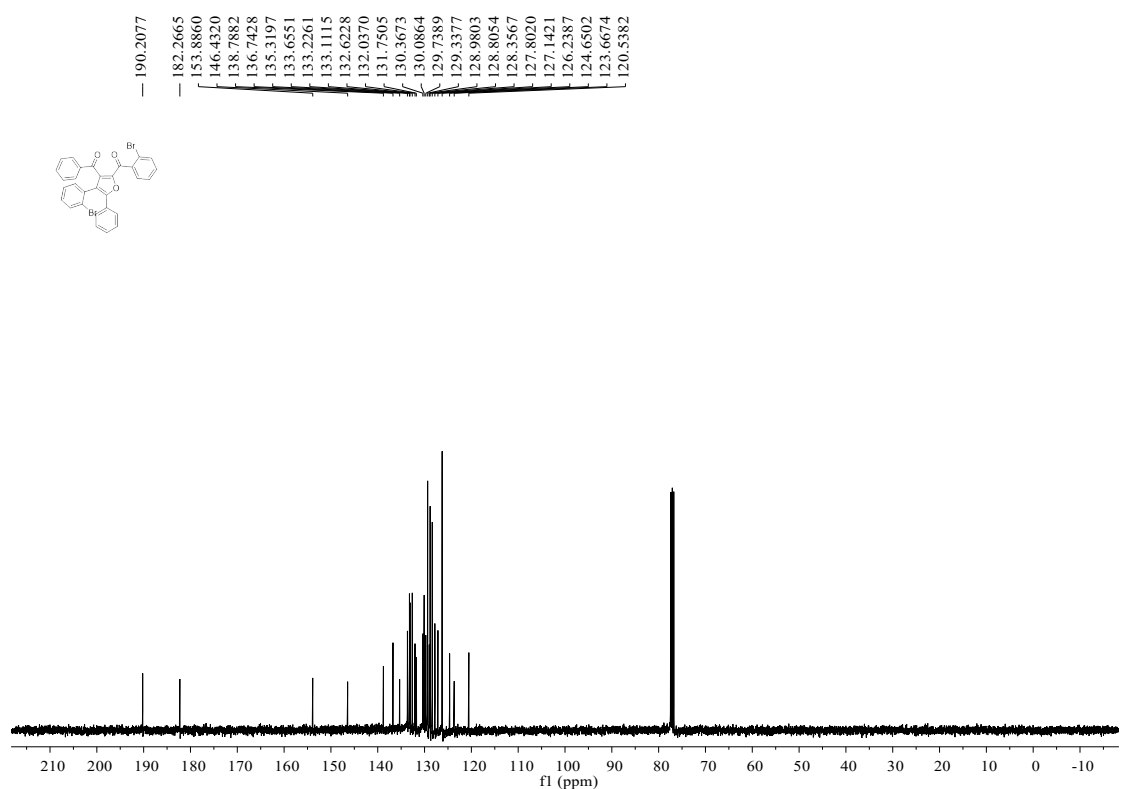

(3-benzoyl-5-phenyl-4-(thiophen-2-yl)furan-2-yl)(thiophen-2-yl)methanone (**3na**)

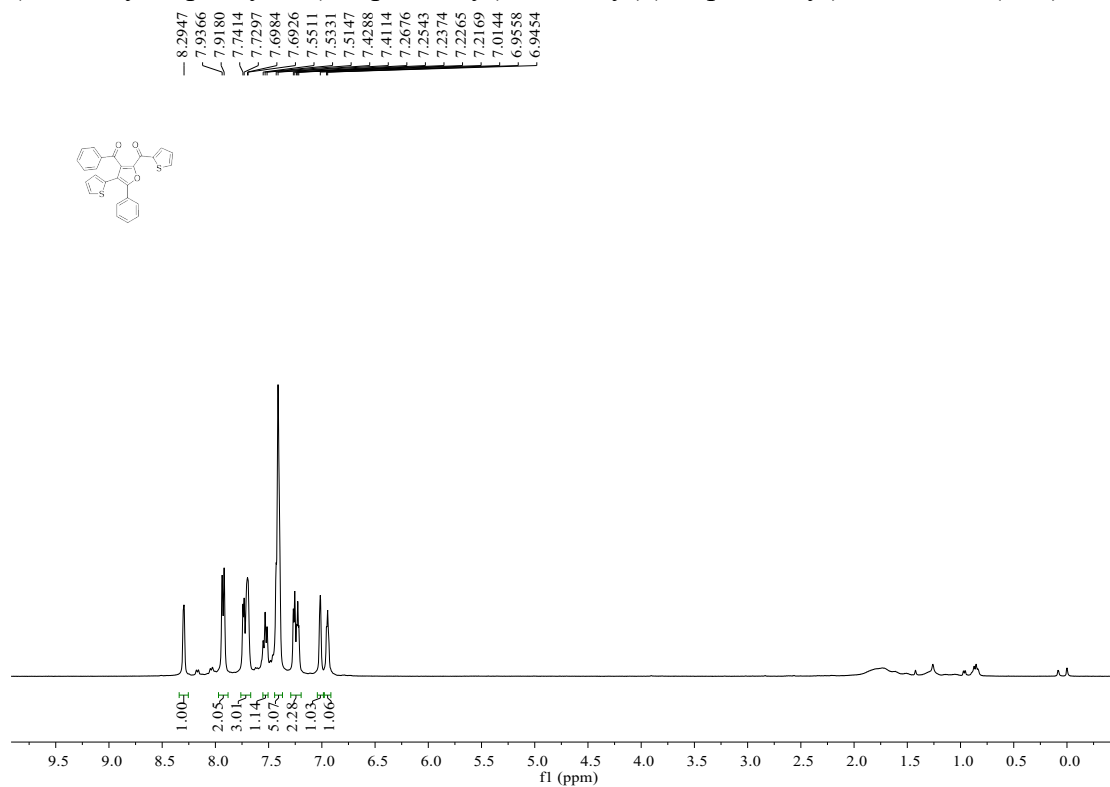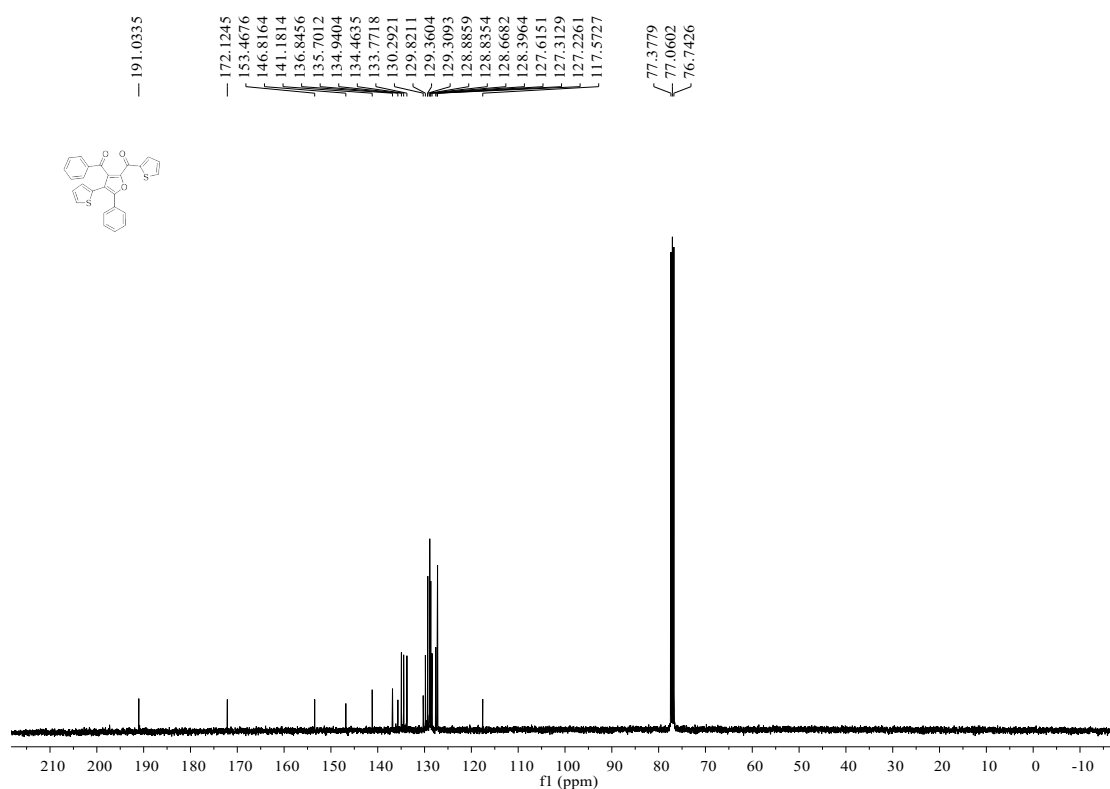

(3-benzoyl-5-phenyl-4-(thiophen-3-yl)furan-2-yl)(thiophen-3-yl)methanone (**30a**)

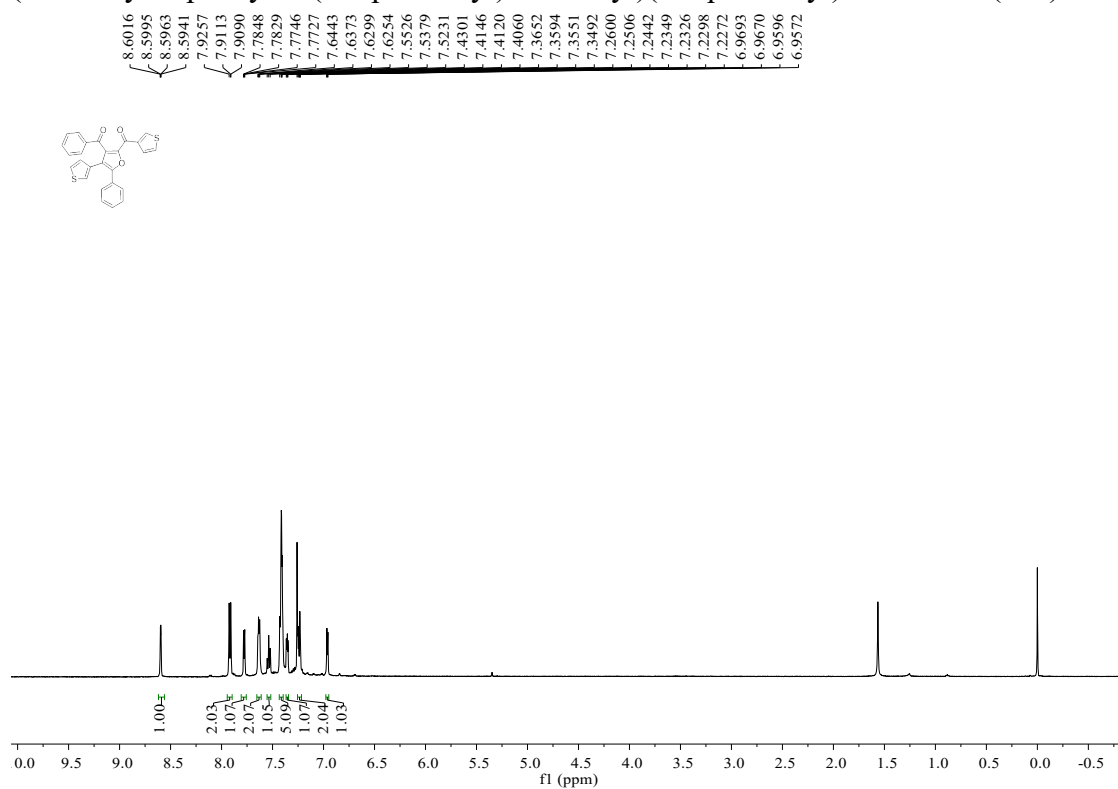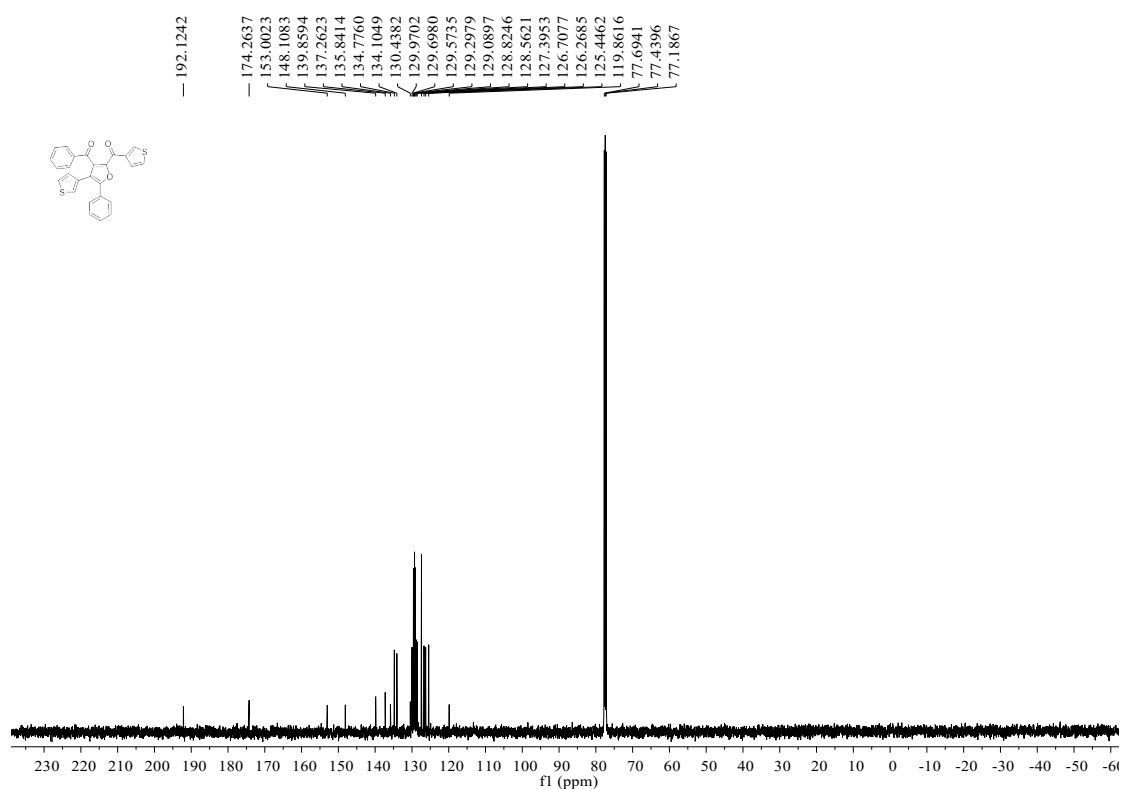

(2-(1-naphthoyl)-4-(naphthalen-1-yl)-5-phenylfuran-3-yl)(phenyl)methanone (**3pa**)

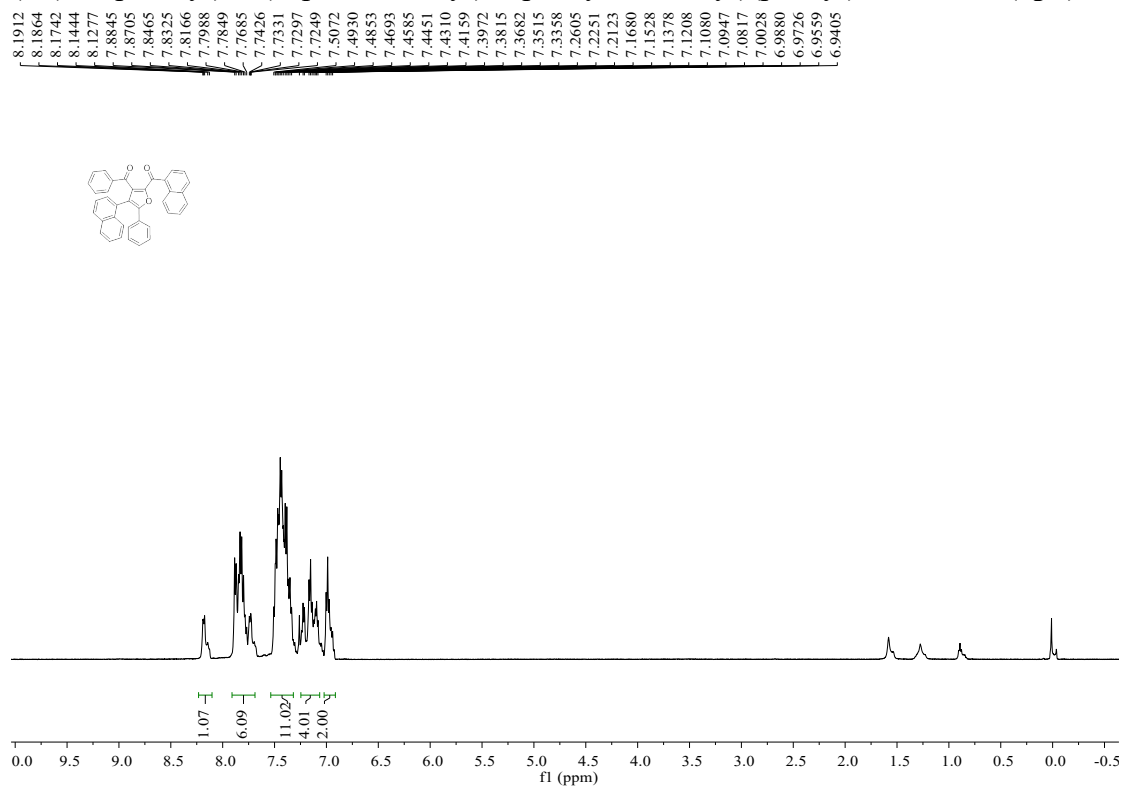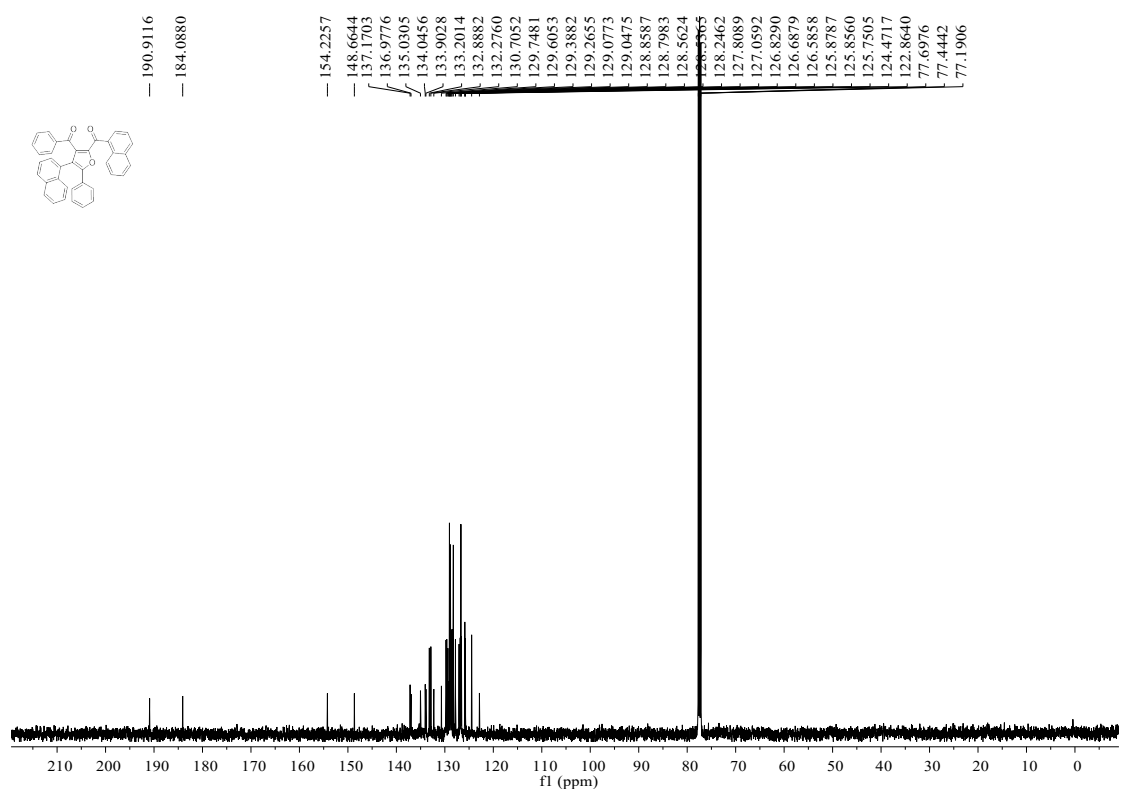

(2-benzoyl-4-phenyl-5-(p-tolyl)furan-3-yl)(p-tolyl)methanone (**3ab**)

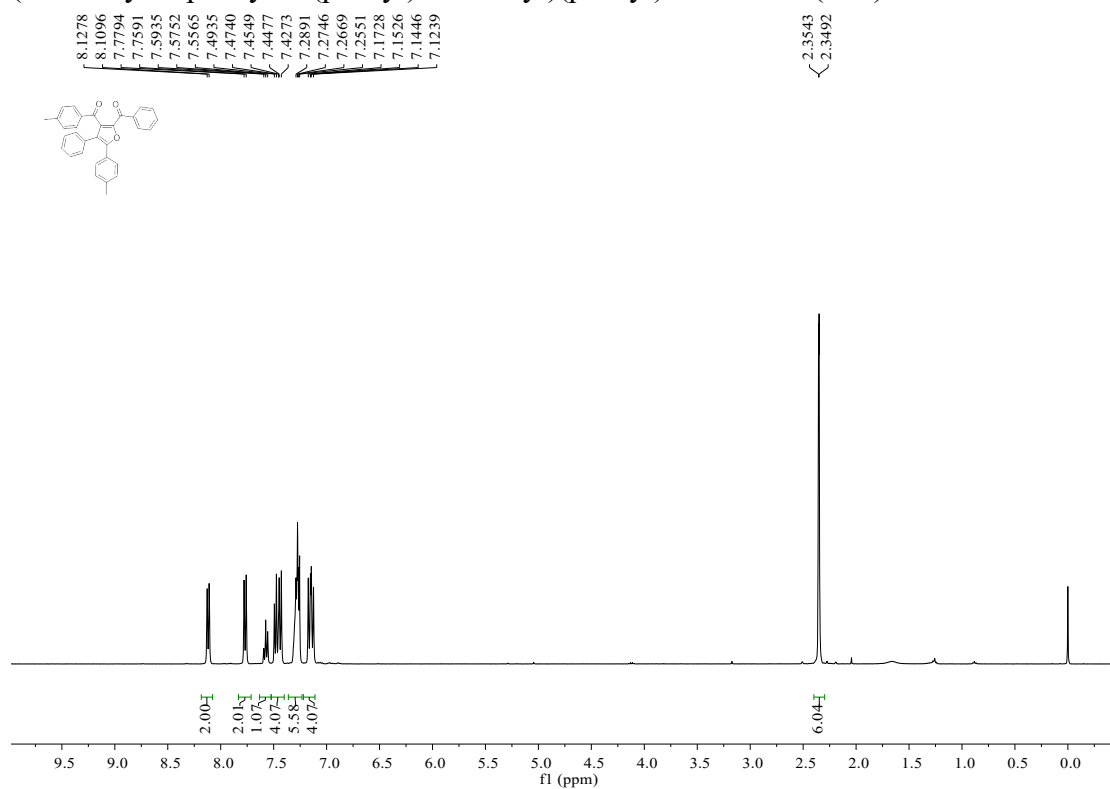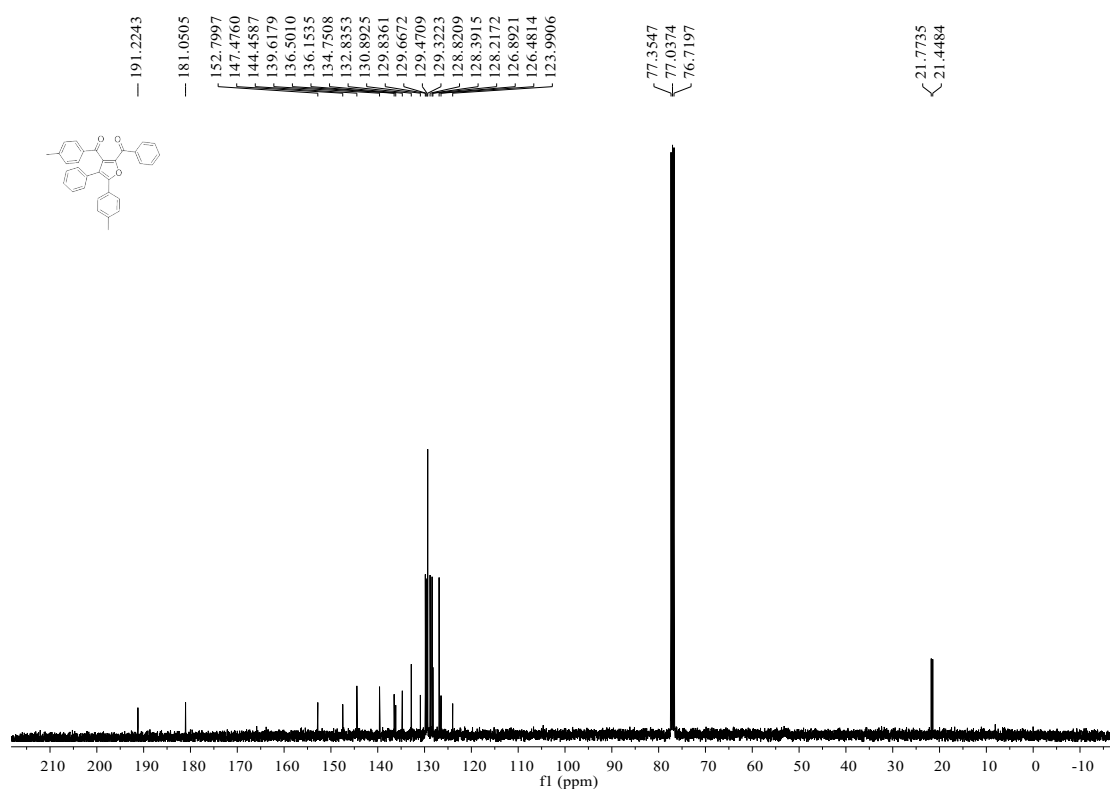

(2-benzoyl-5-(4-methoxyphenyl)-4-phenylfuran-3-yl)(4-methoxyphenyl)methanone  
**(3ac)**

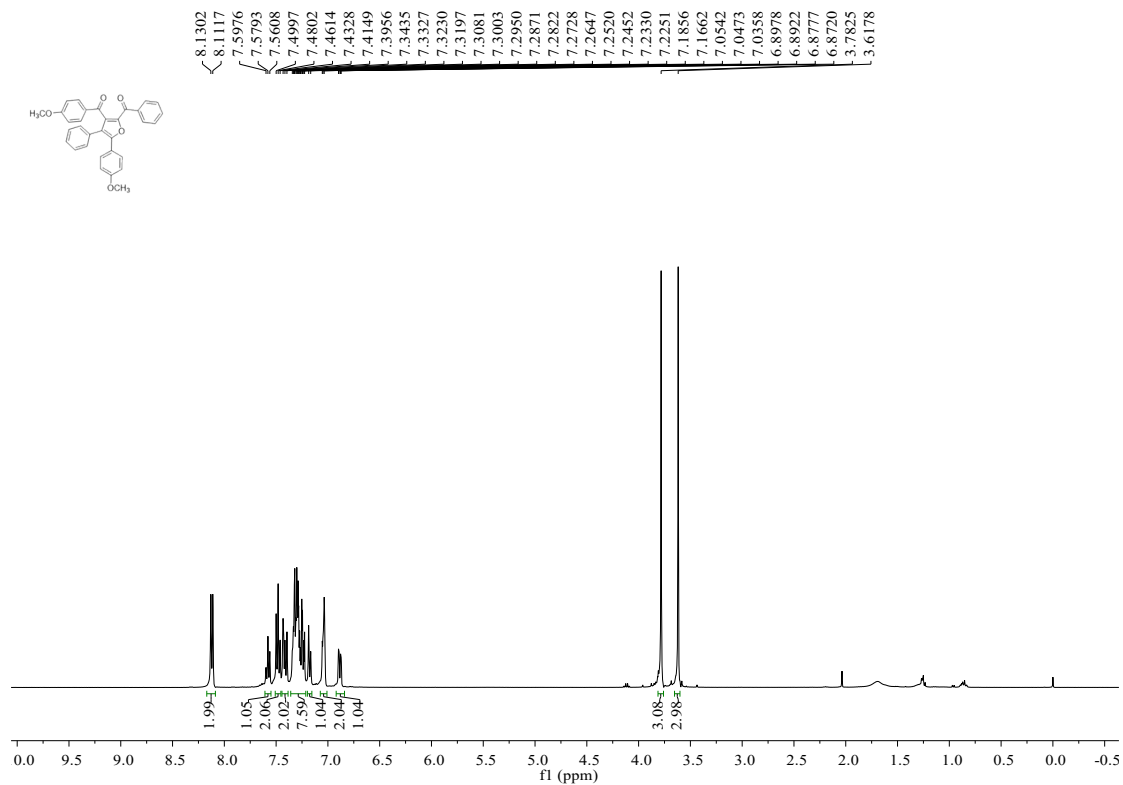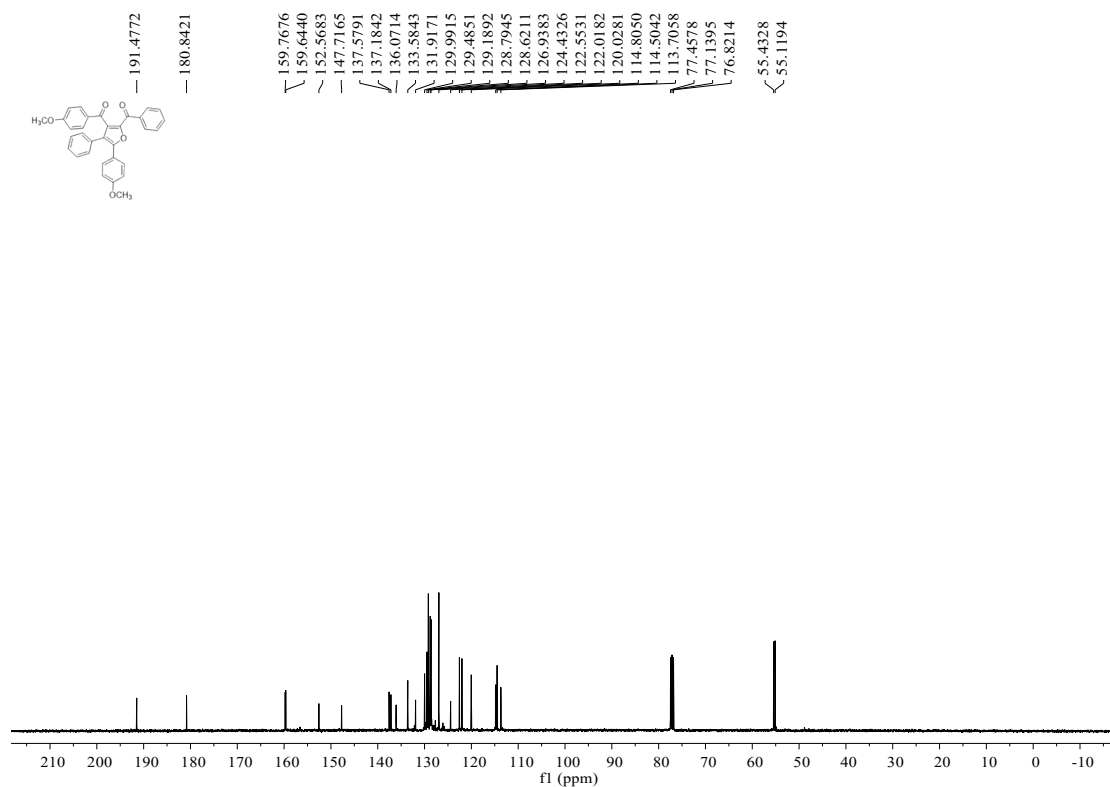

(2-benzoyl-5-(4-chlorophenyl)-4-phenylfuran-3-yl)(4-chlorophenyl)methanone (**3ad**)

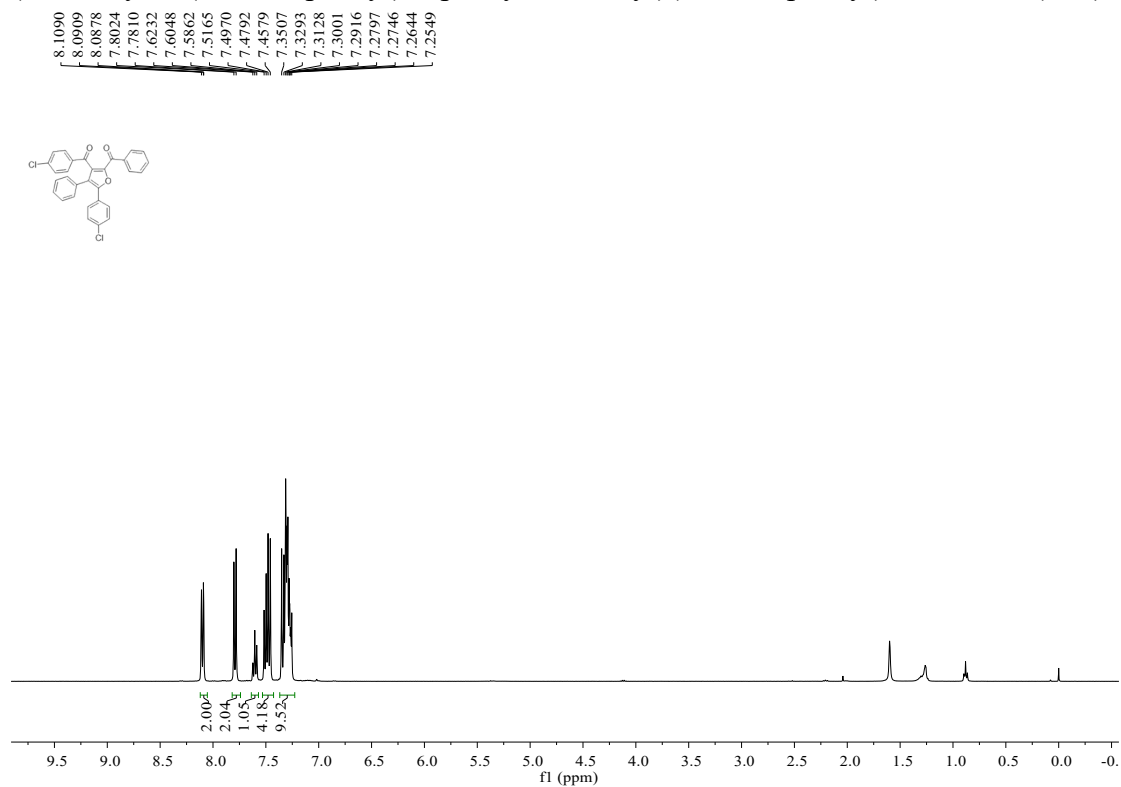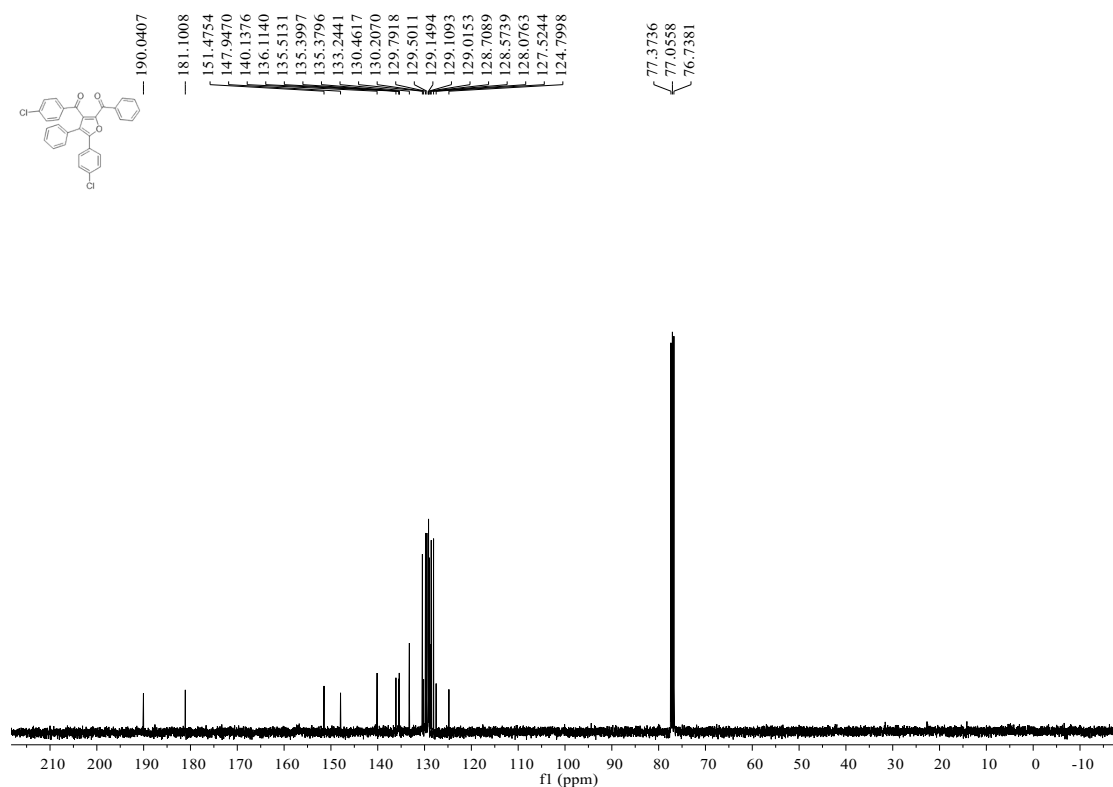



(2-benzoyl-5-(4-bromophenyl)-4-phenylfuran-3-yl)(4-bromophenyl)methanone (**3ae**)

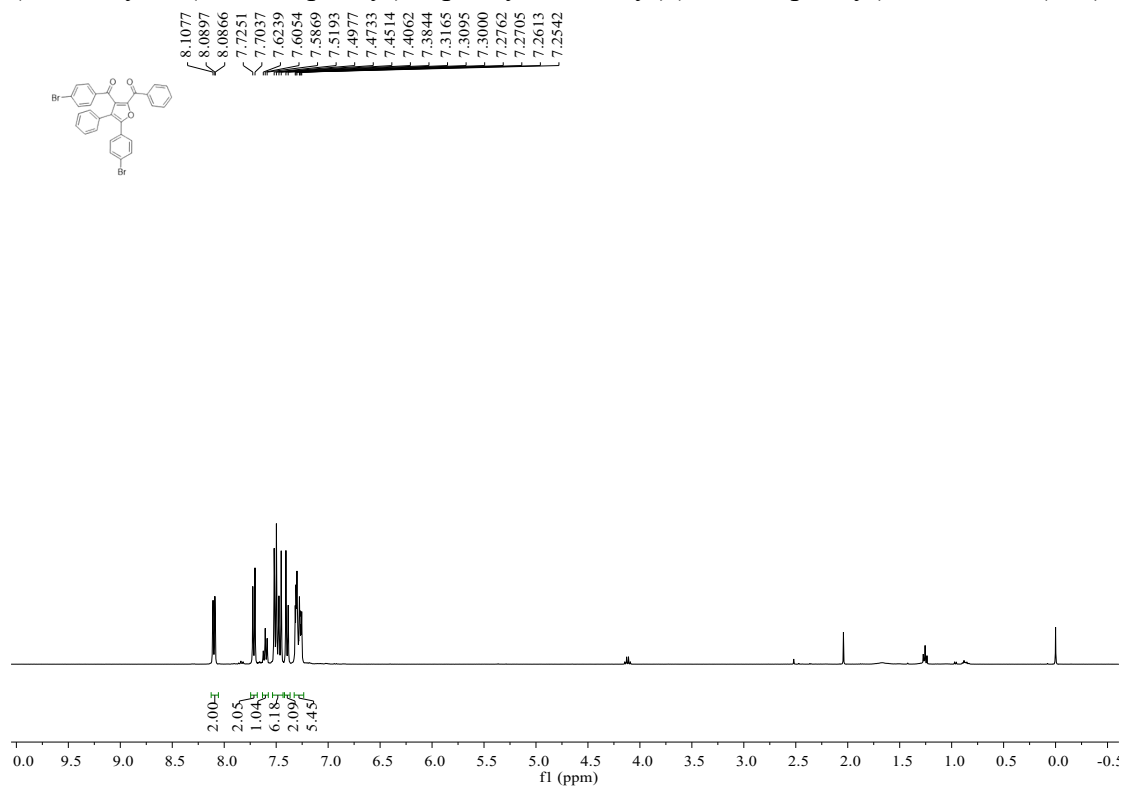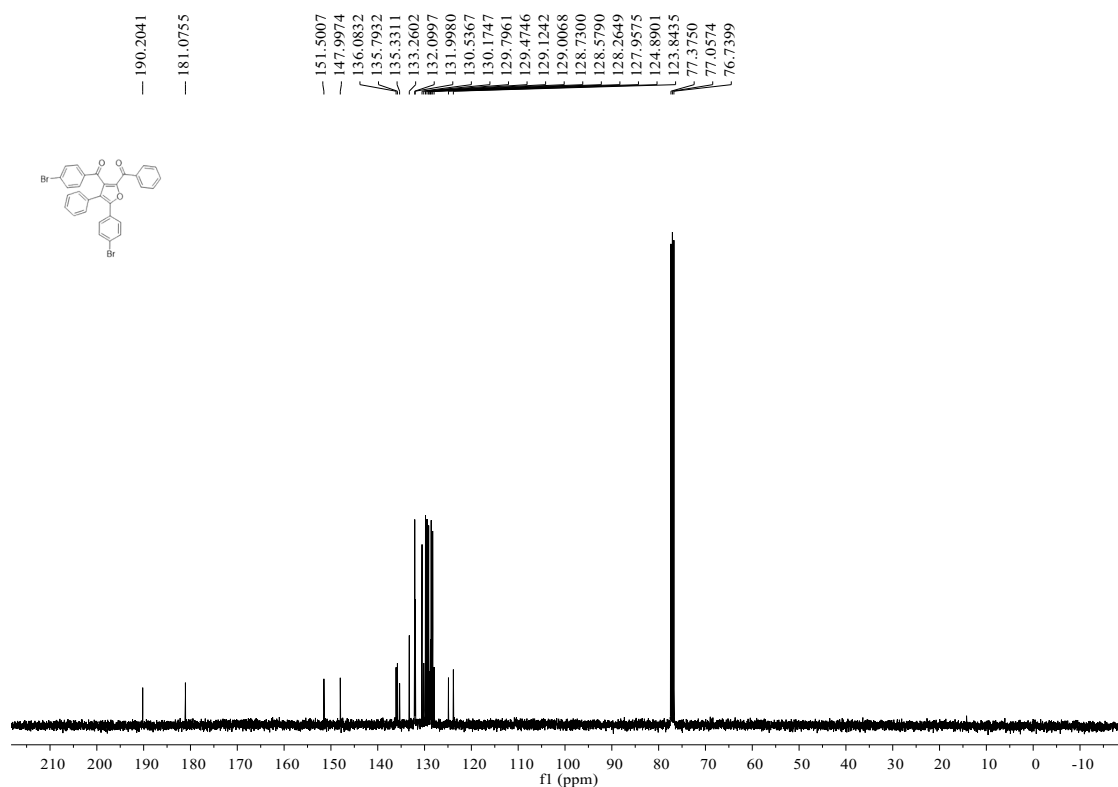

(2-benzoyl-4-phenyl-5-(m-tolyl)furan-3-yl)(m-tolyl)methanone (**3af**)

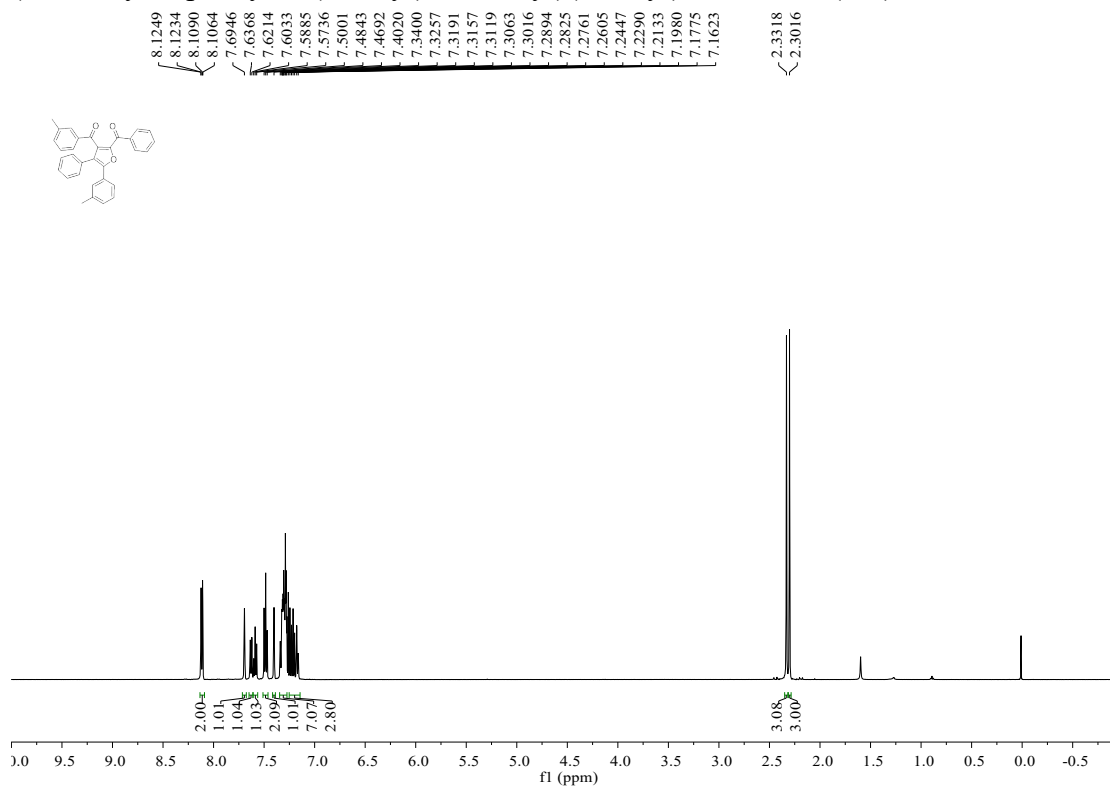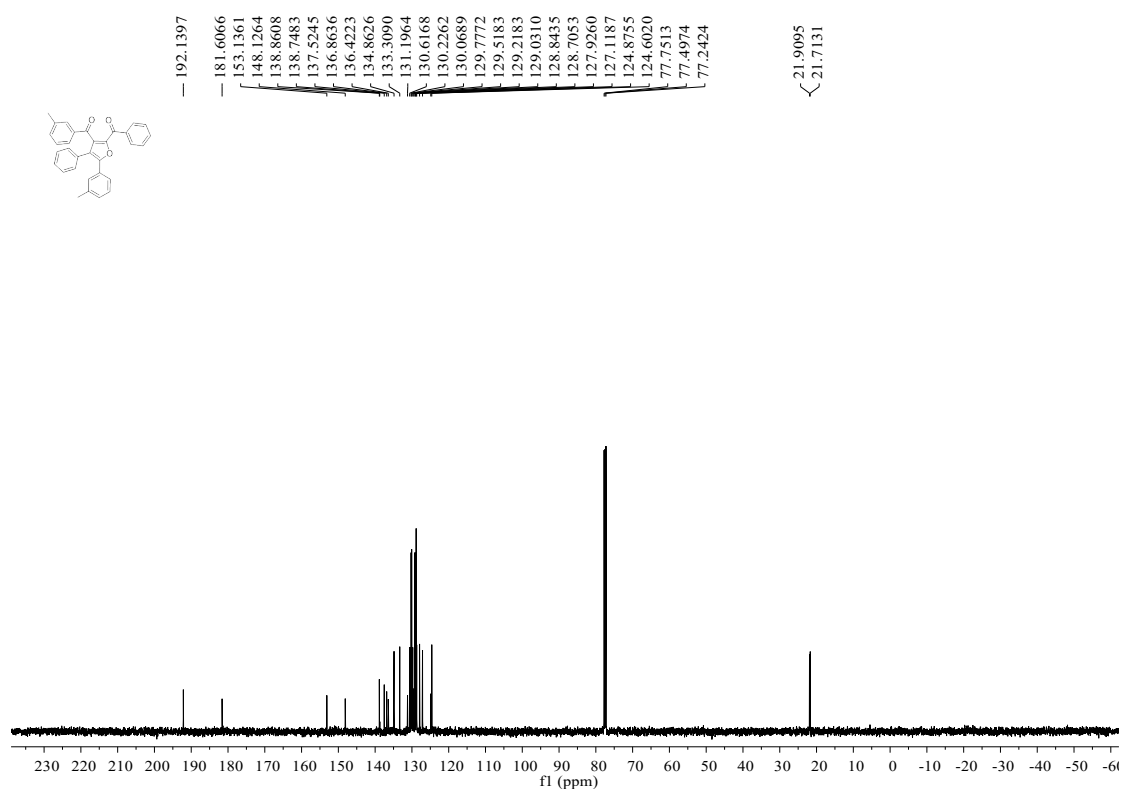

(2-benzoyl-5-(3-methoxyphenyl)-4-phenylfuran-3-yl)(3-methoxyphenyl)methanone

**(3ag)**

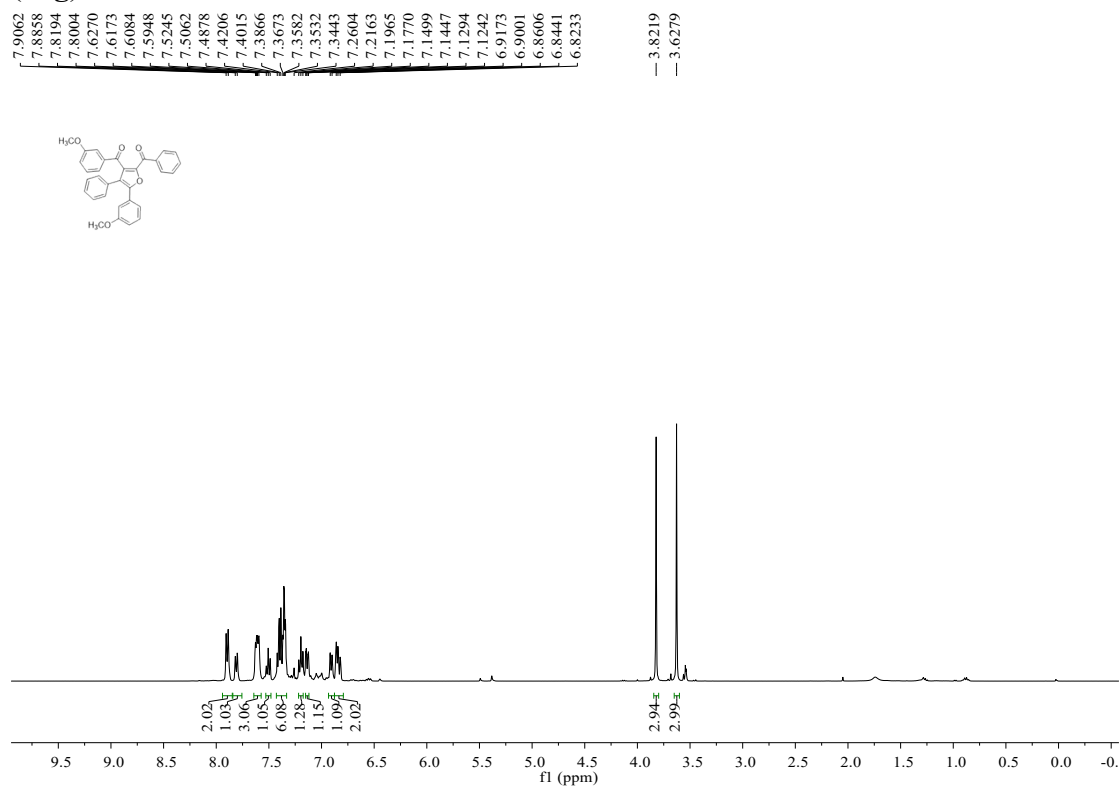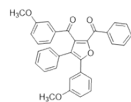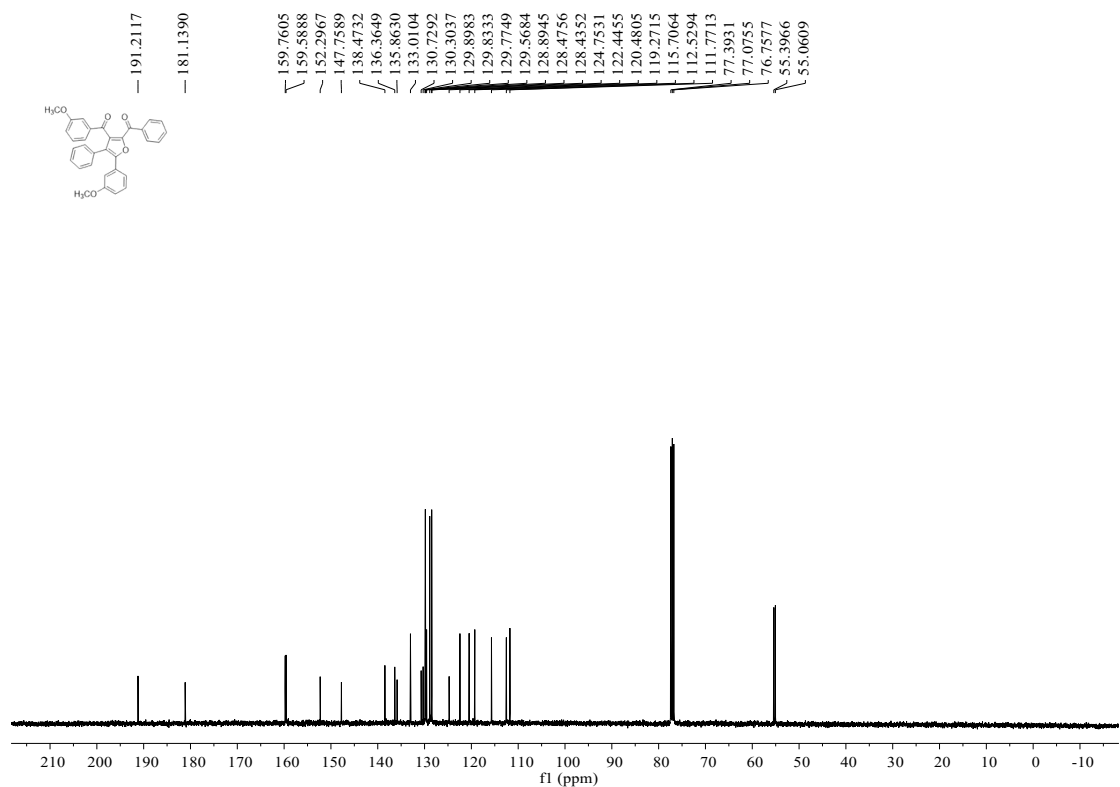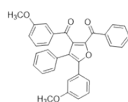

(2-benzoyl-5-(3-chlorophenyl)-4-phenylfuran-3-yl)(3-chlorophenyl)methanone (**3ah**)

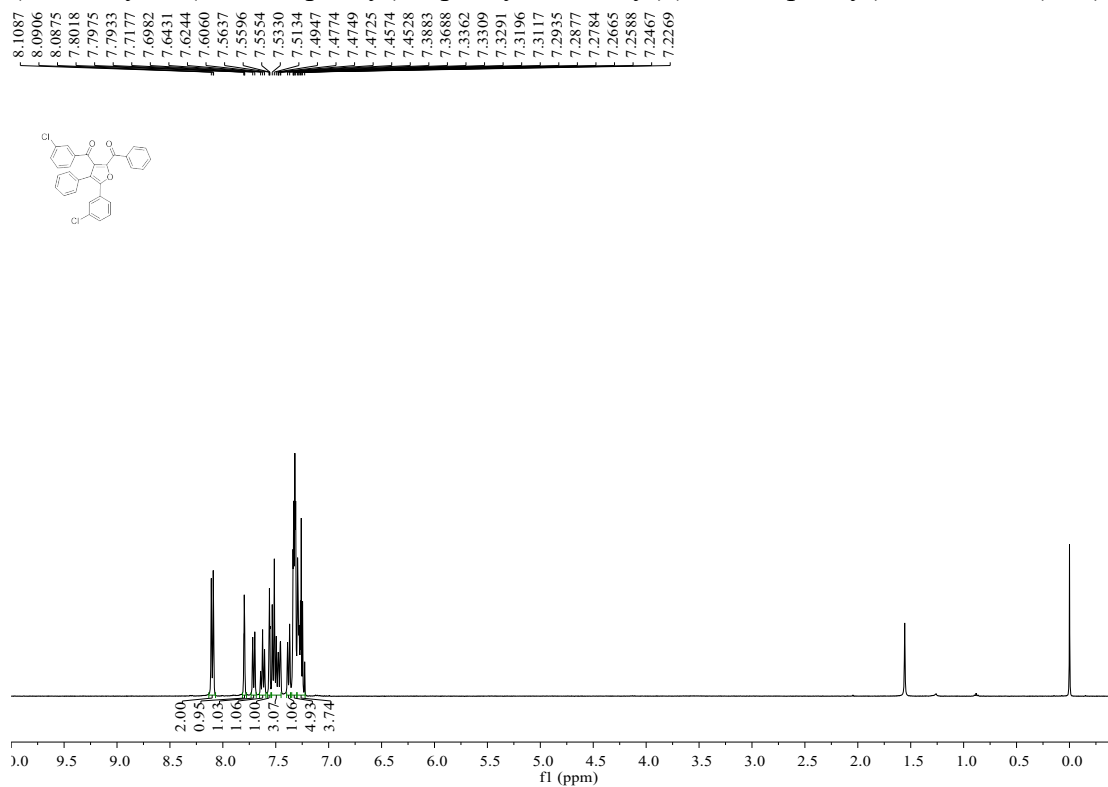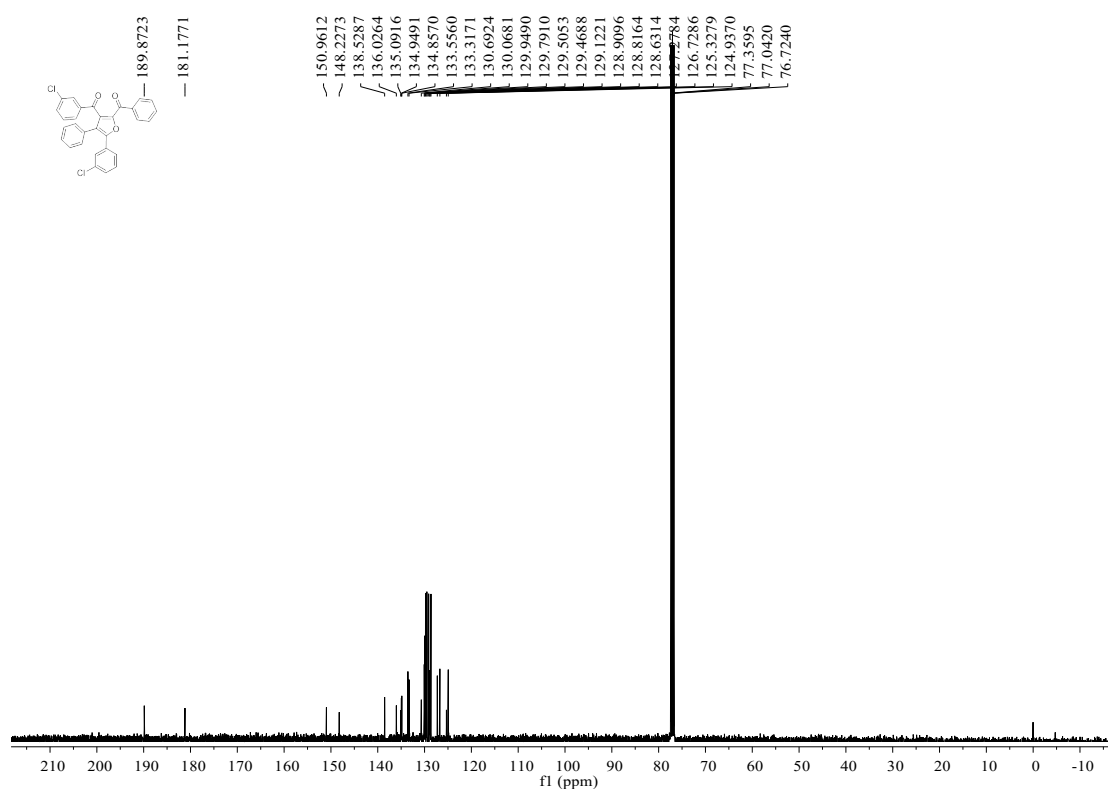

(2-benzoyl-5-(3-bromophenyl)-4-phenylfuran-3-yl)(3-bromophenyl)methanone (**3ai**)

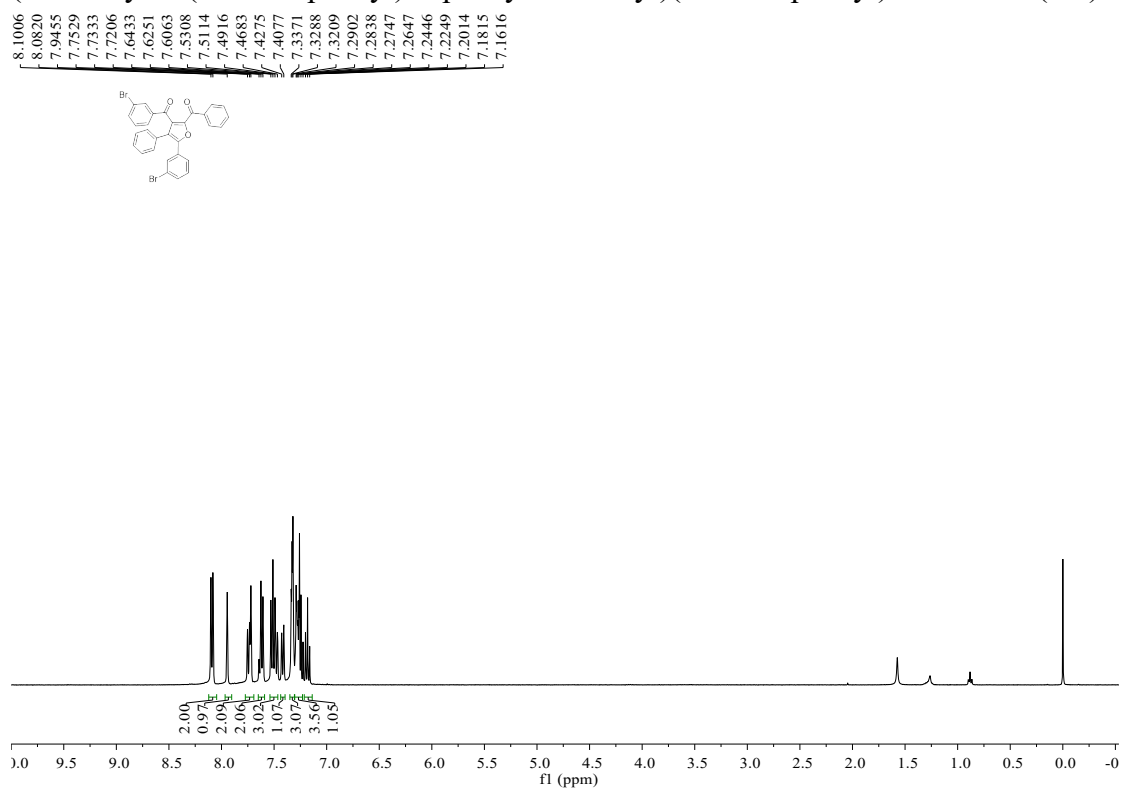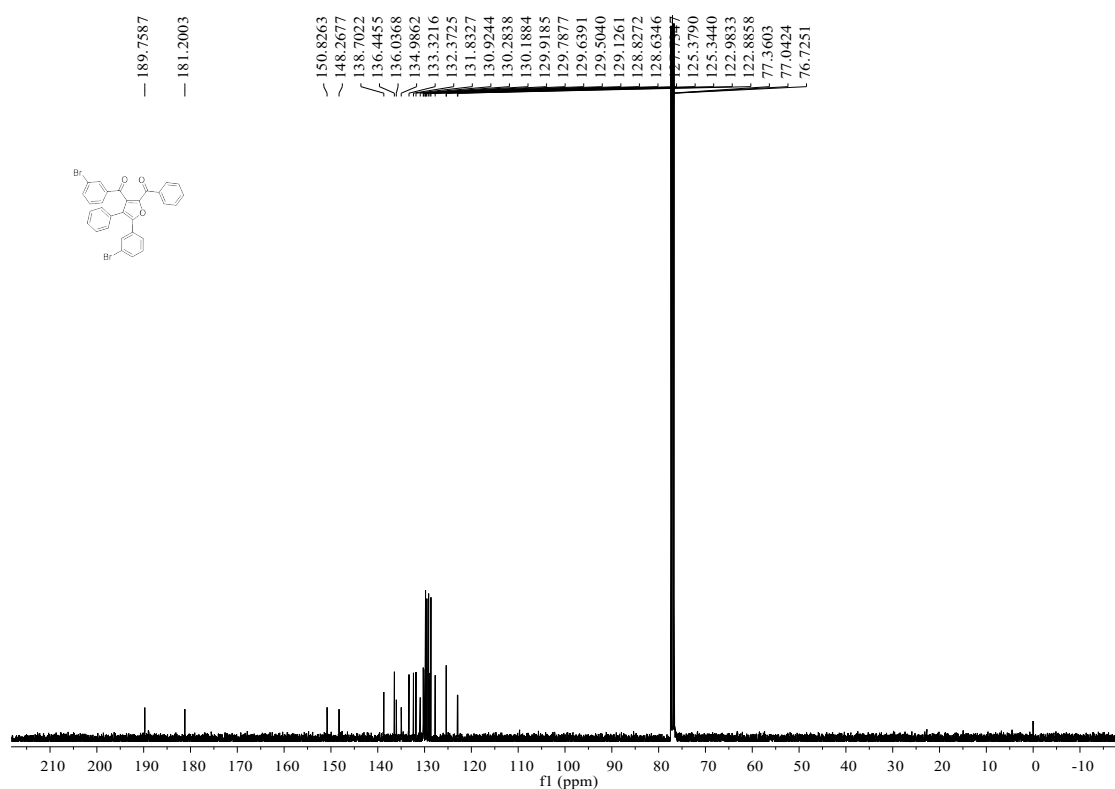

(2-benzoyl-5-(2-chlorophenyl)-4-phenylfuran-3-yl)(2-chlorophenyl)methanone (**3aj**)

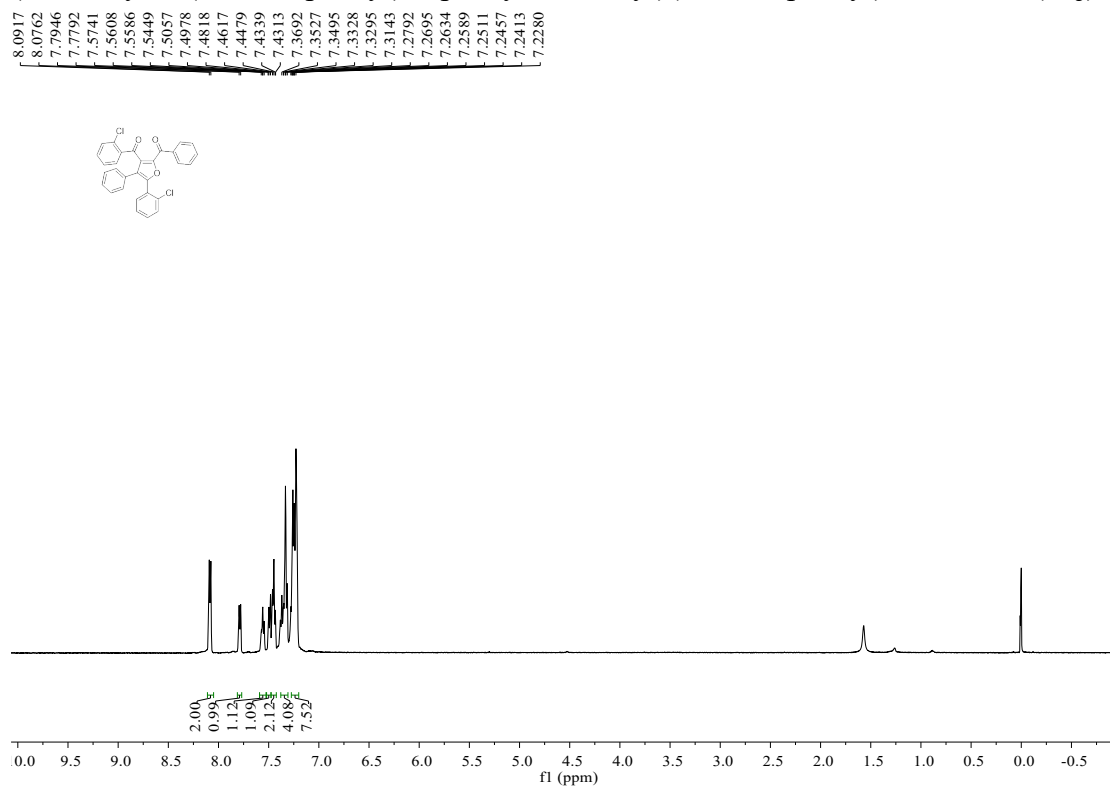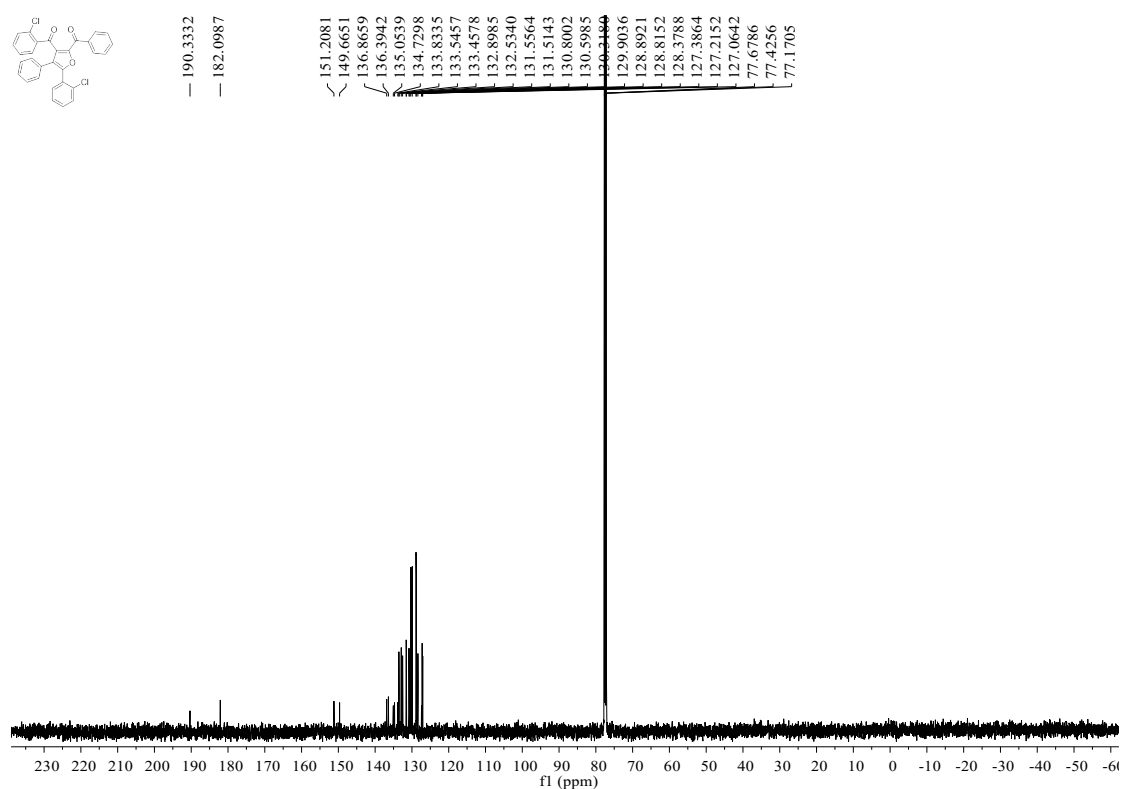

(5-benzoyl-3-phenyl-[2,2'-bifuran]-4-yl)(furan-2-yl)methanone (**3al**)

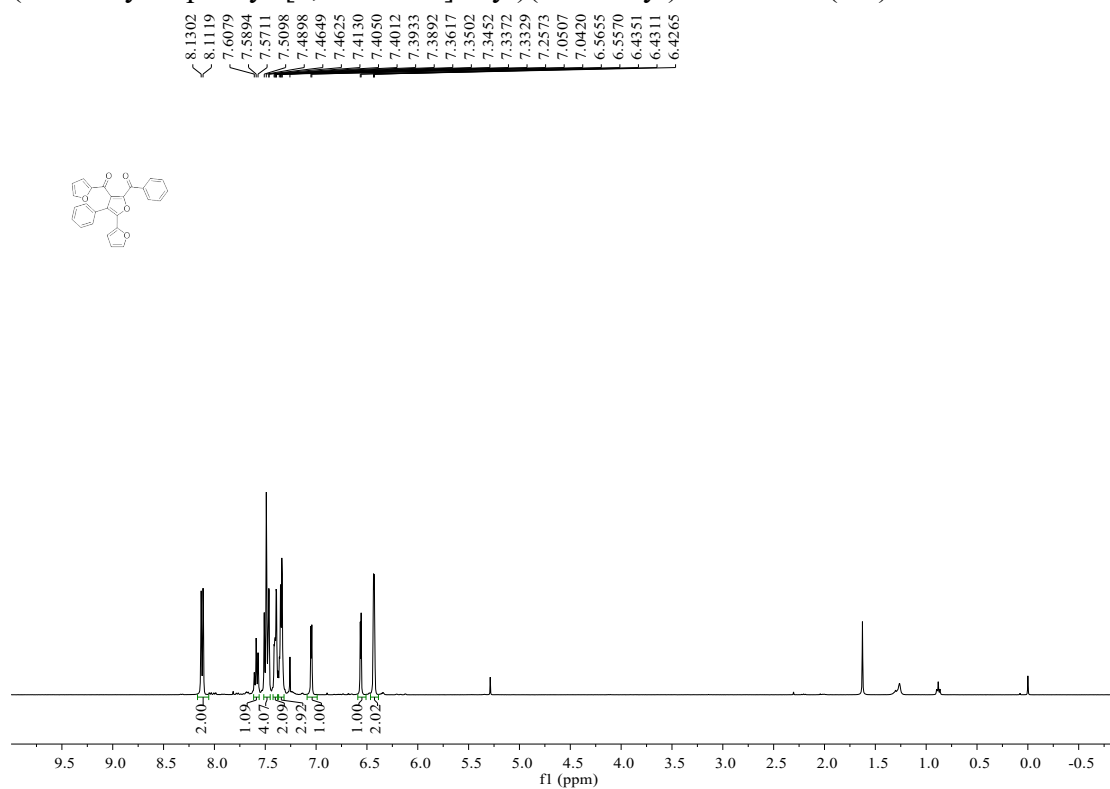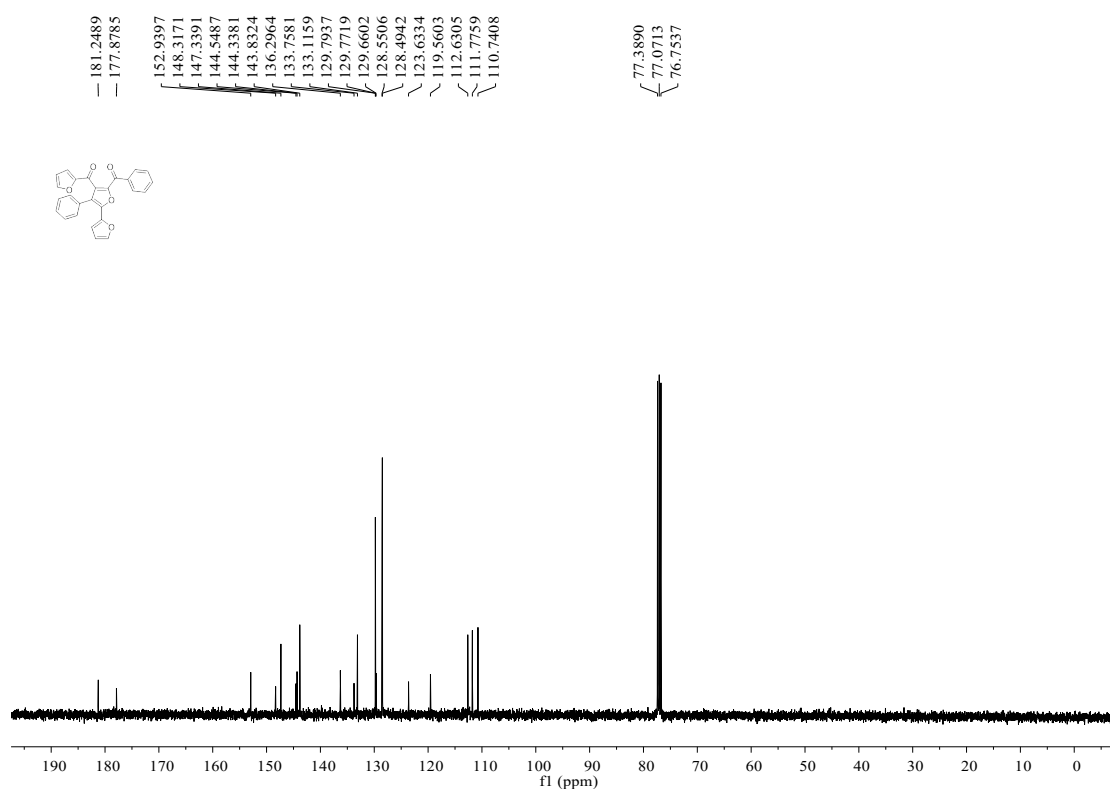

(2-benzoyl-4-phenyl-5-(thiophen-2-yl)furan-3-yl)(thiophen-2-yl)methanone (**3am**)

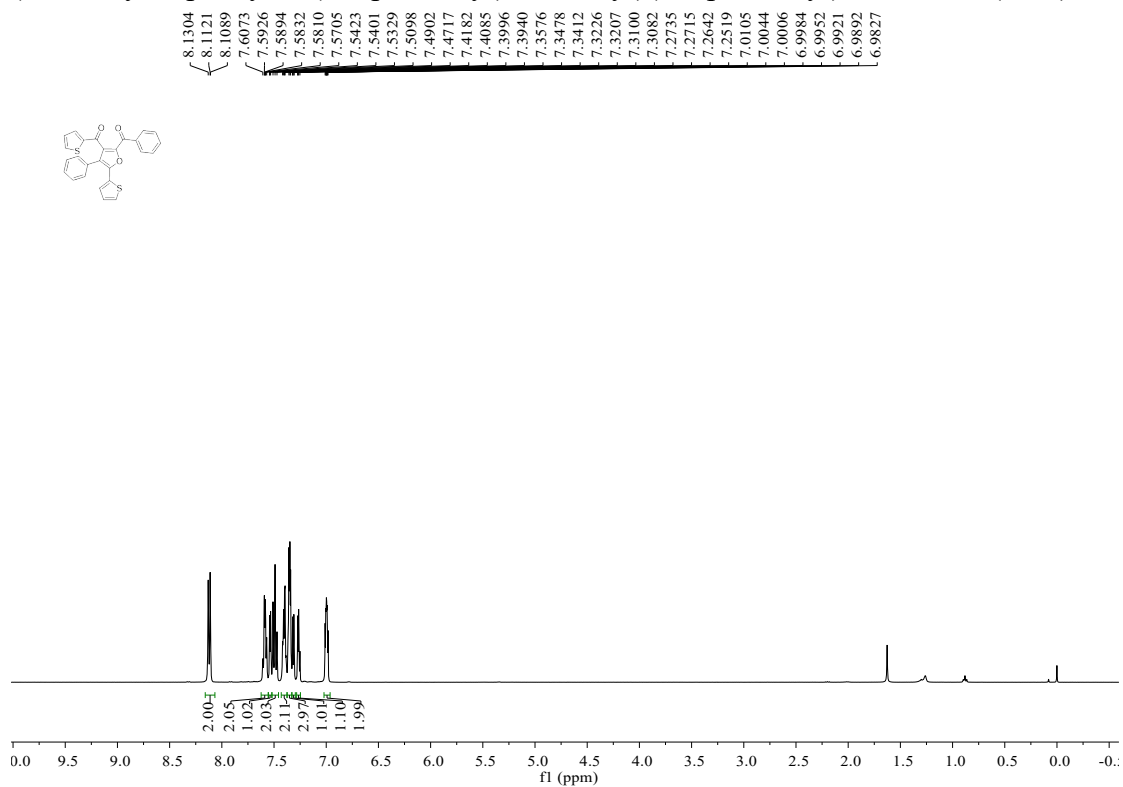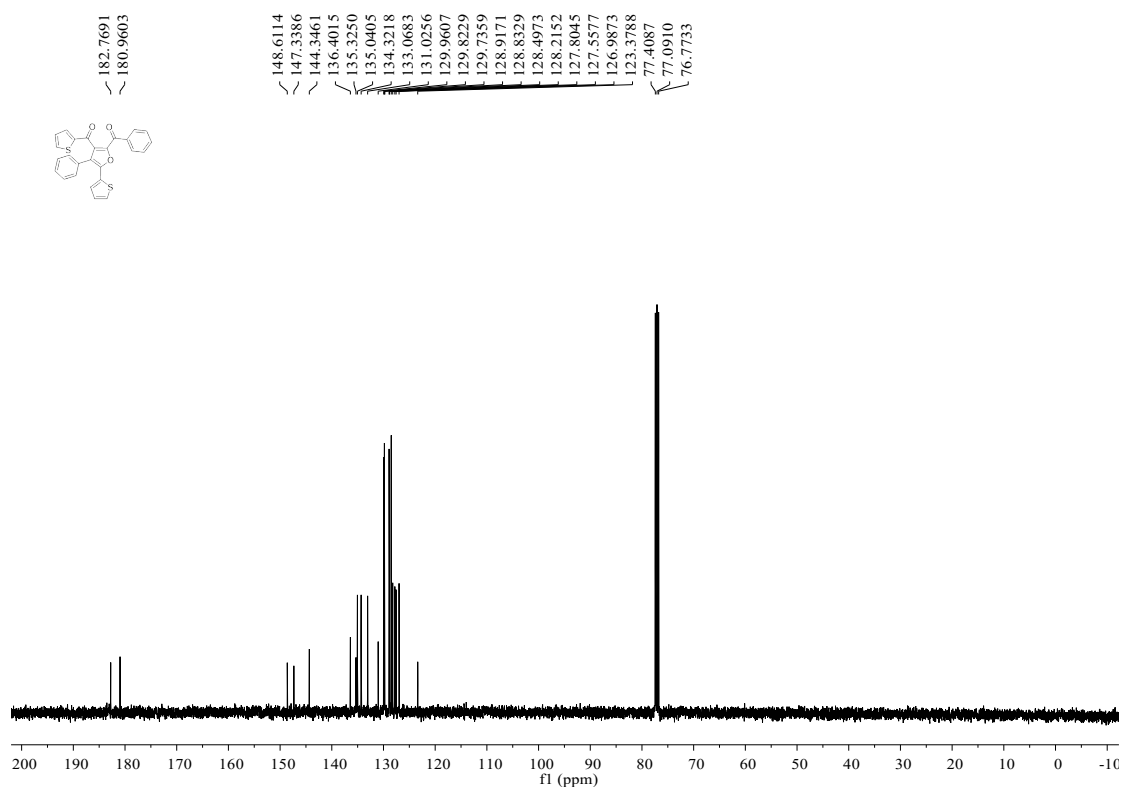



(4-phenyl-5-(p-tolyl)furan-2,3-diyl)bis(phenylmethanone) (**3an**)

(2-benzoyl-4,5-diphenylfuran-3-yl)(p-tolyl)methanone (**3an'**)

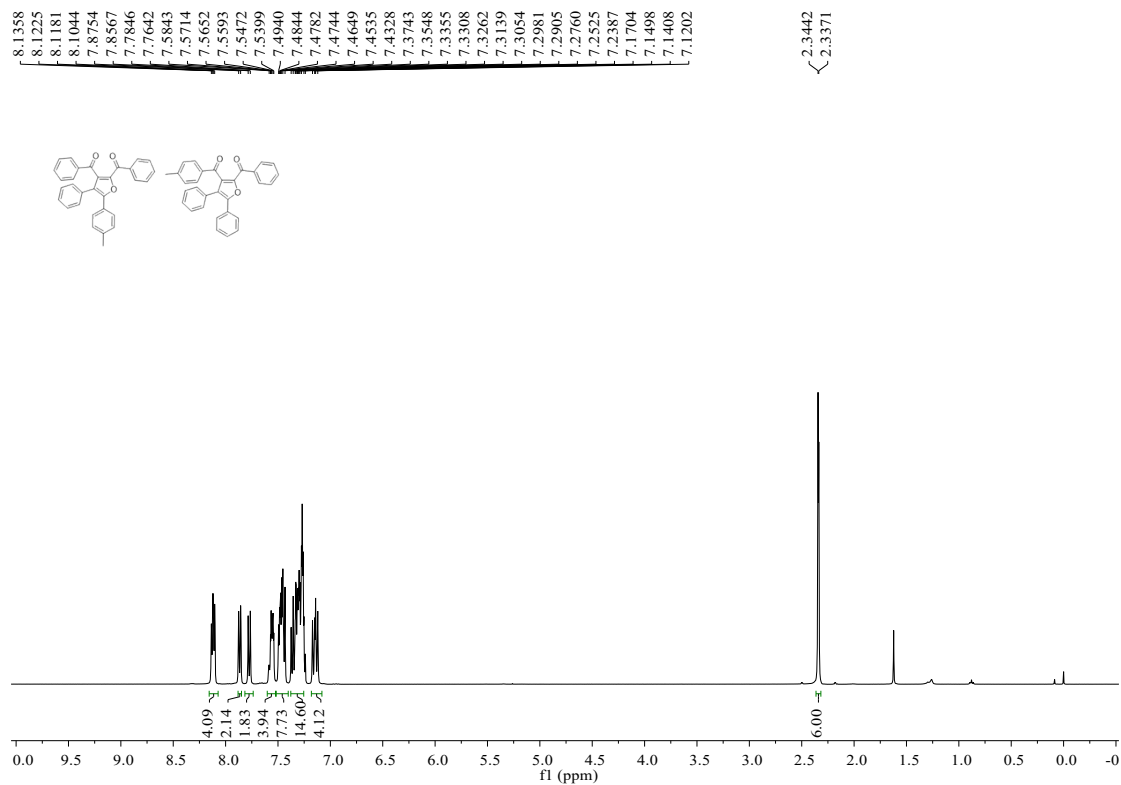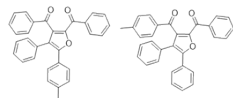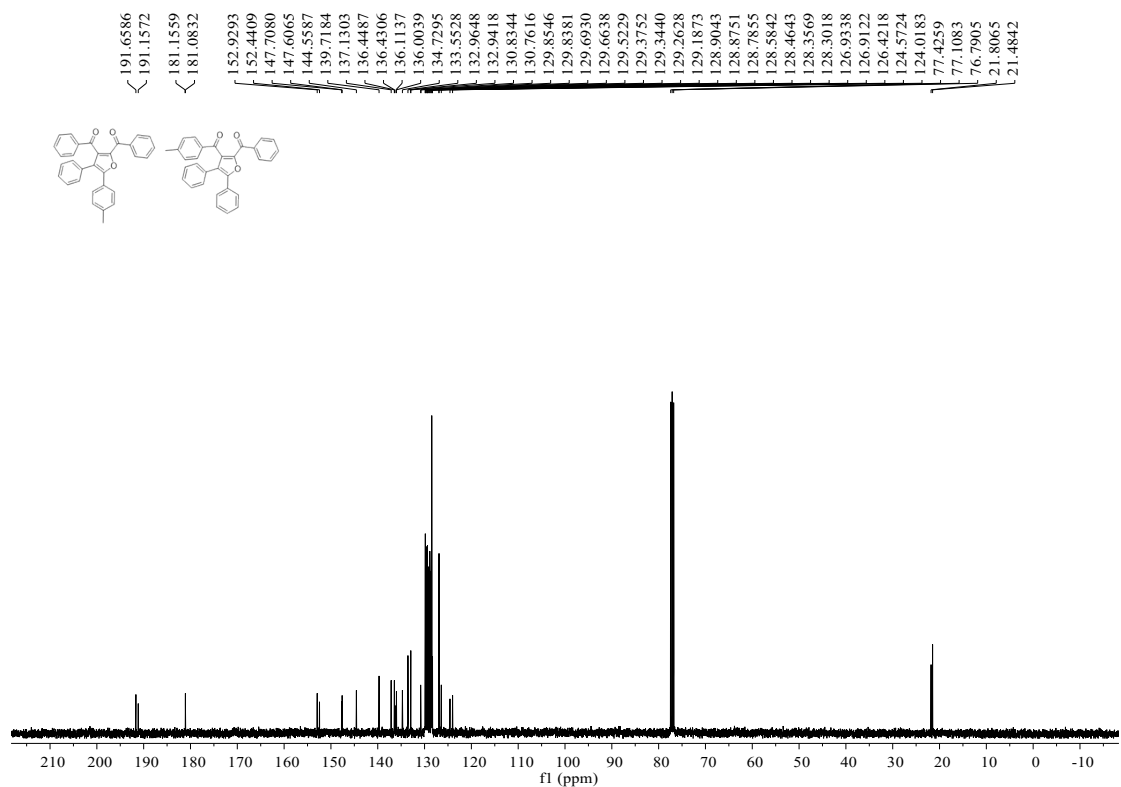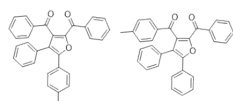

(4,5-bis(4-chlorophenyl)furan-2,3-diyl)bis((4-chlorophenyl)methanone) (**3dd**)

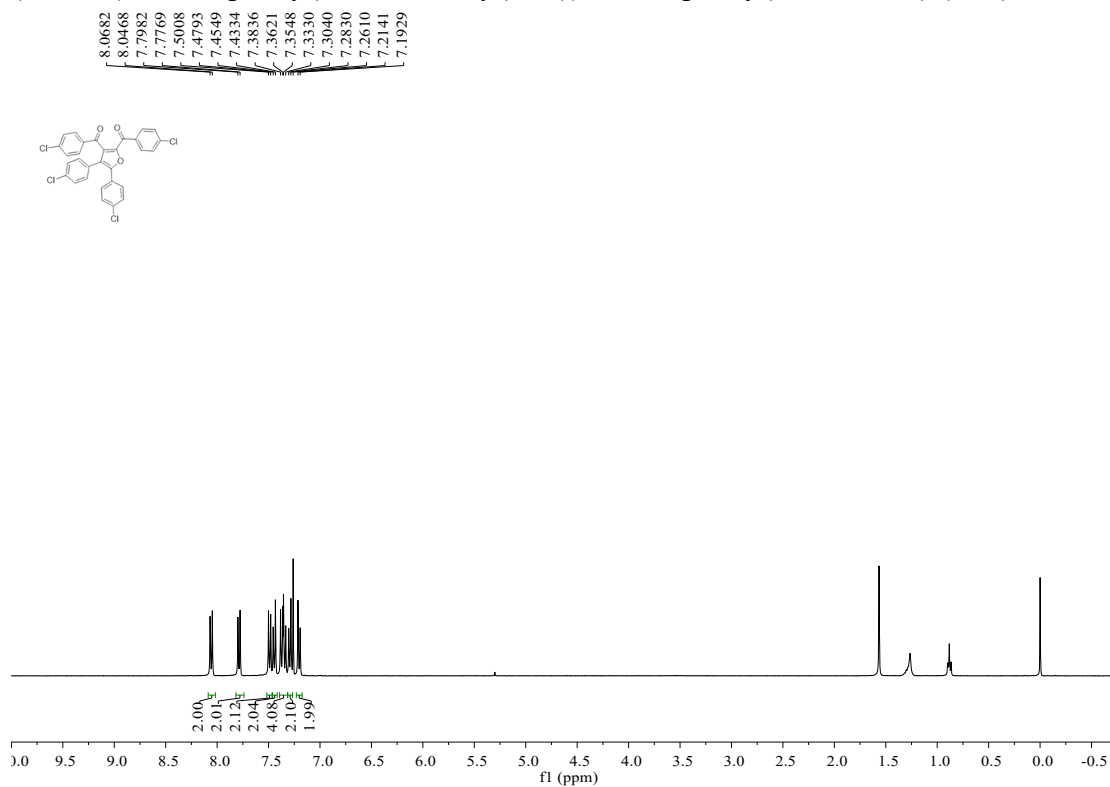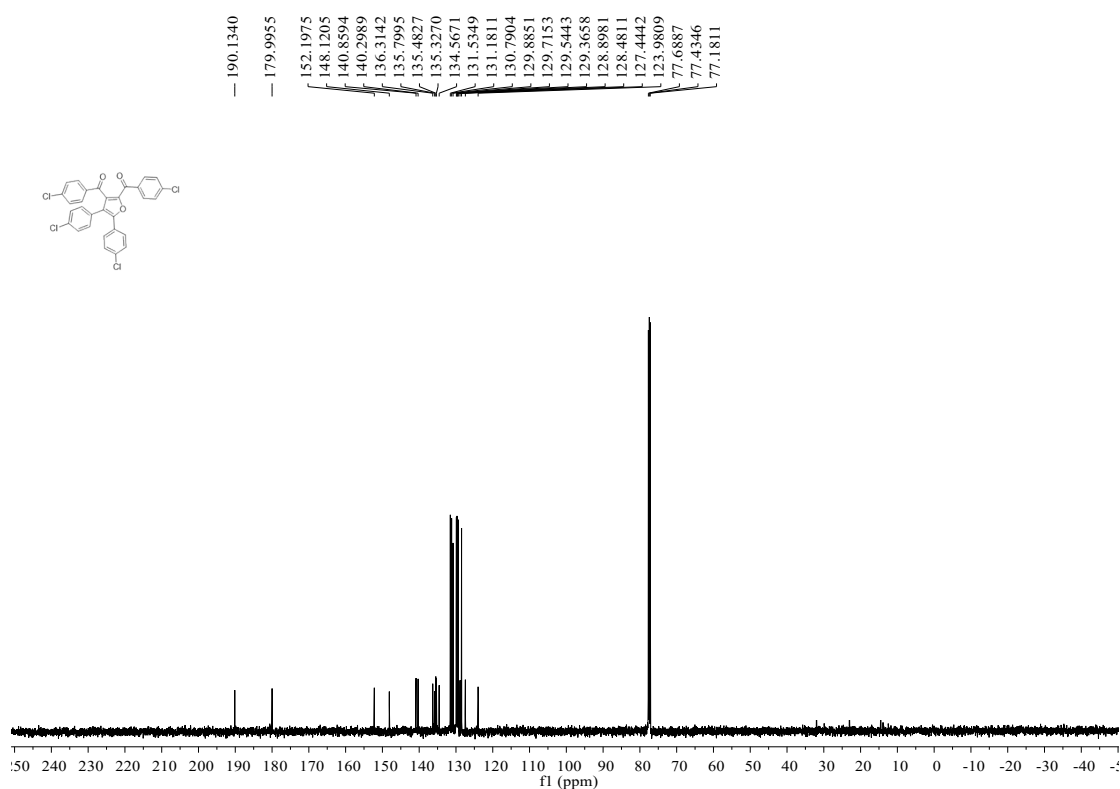

(4,5-bis(4-bromophenyl)furan-2,3-diyl)bis((4-bromophenyl)methanone) (**3ee**)

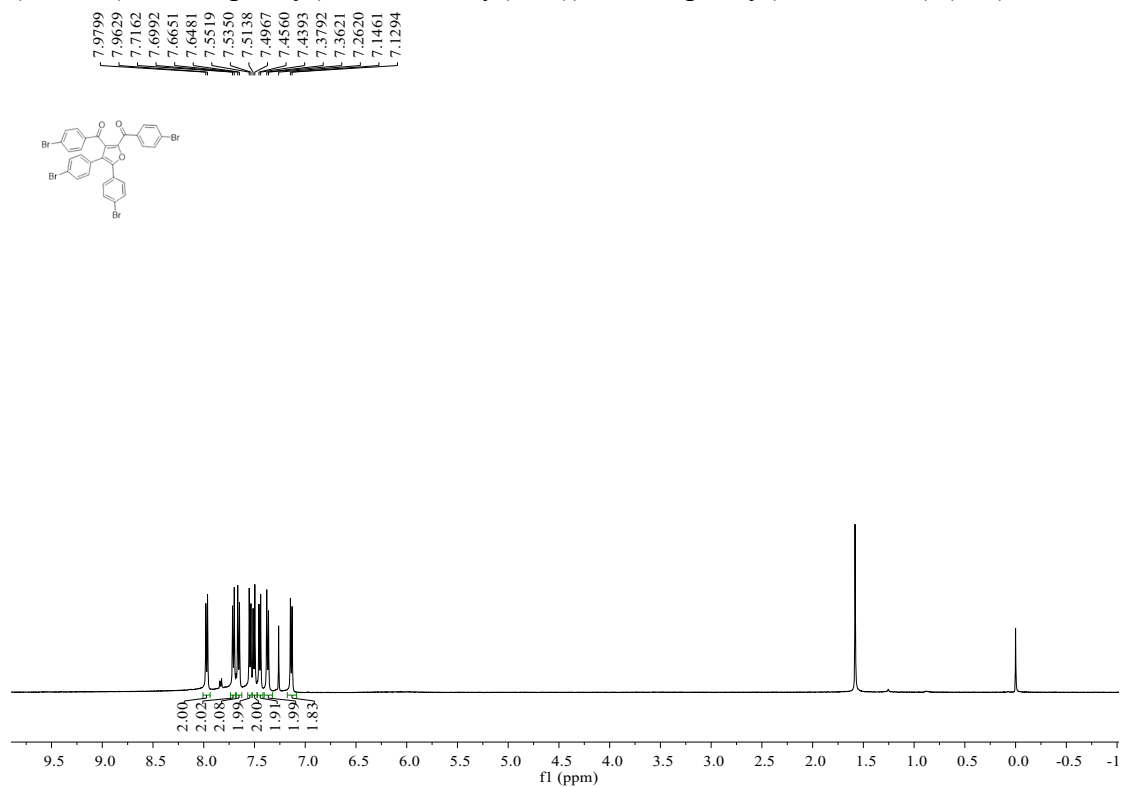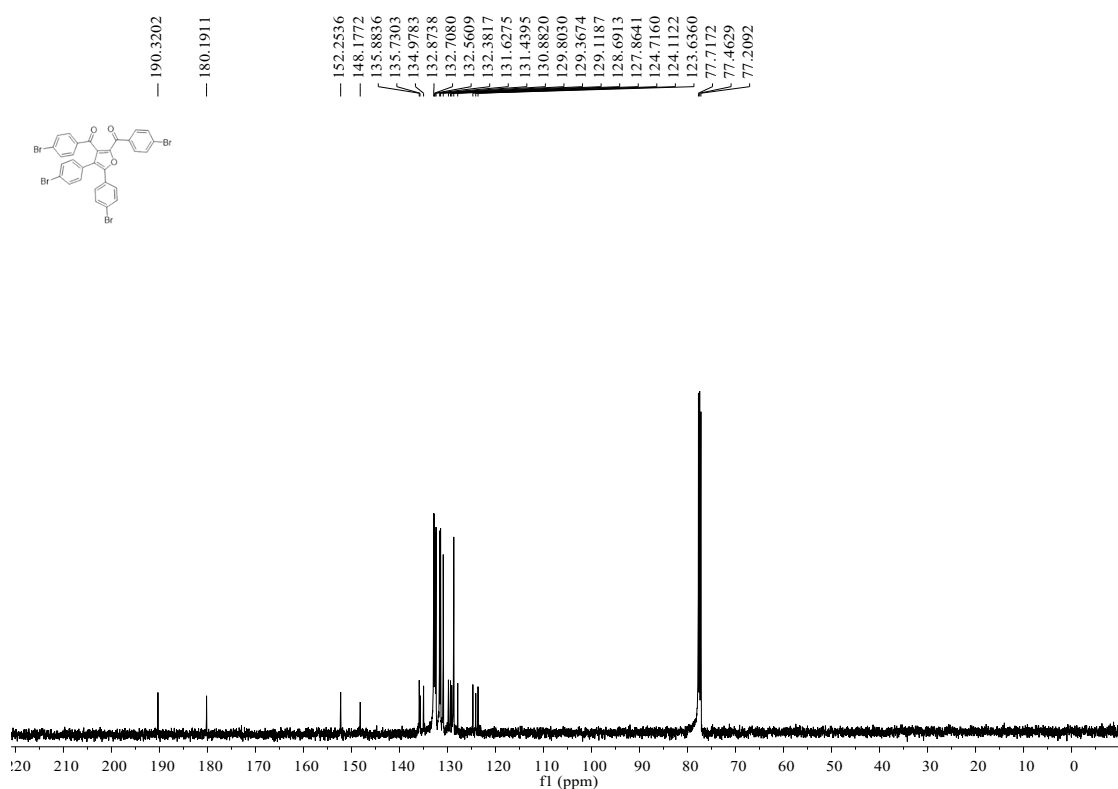

(3-(4-(9H-carbazol-9-yl)benzoyl)-5-(4-(9H-carbazol-9-yl)phenyl)-4-phenylfuran-2-yl)(phenyl)methanone (4)

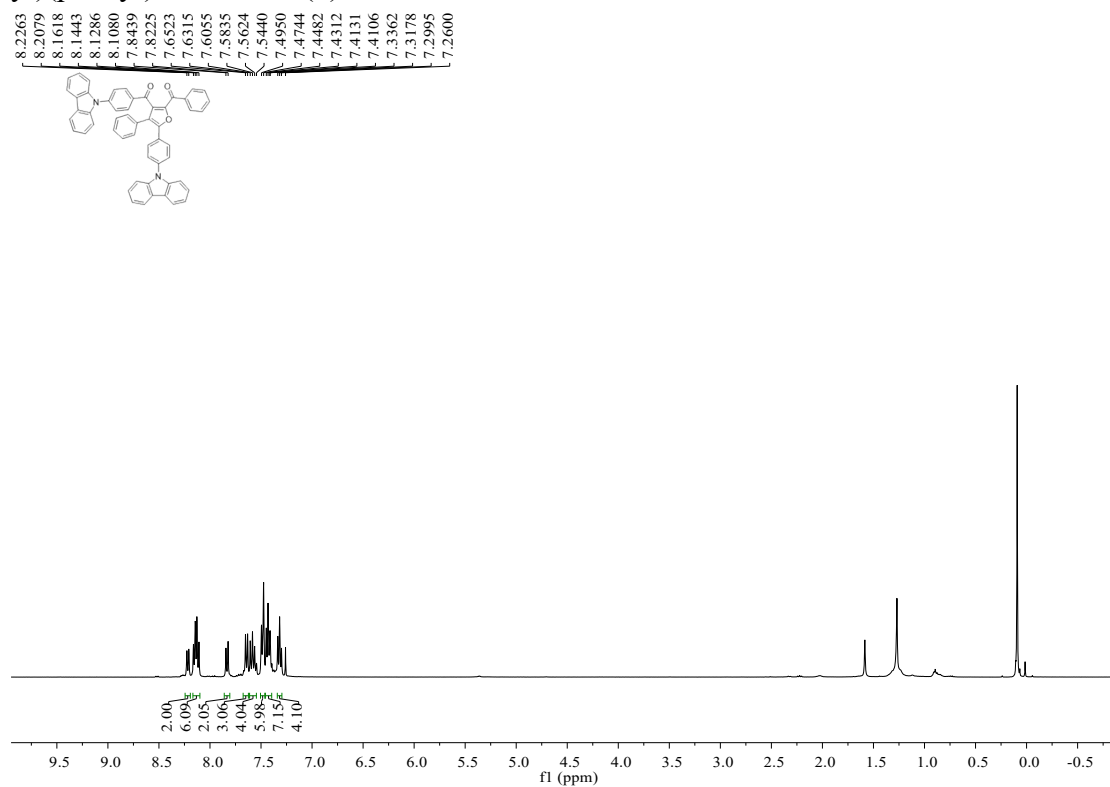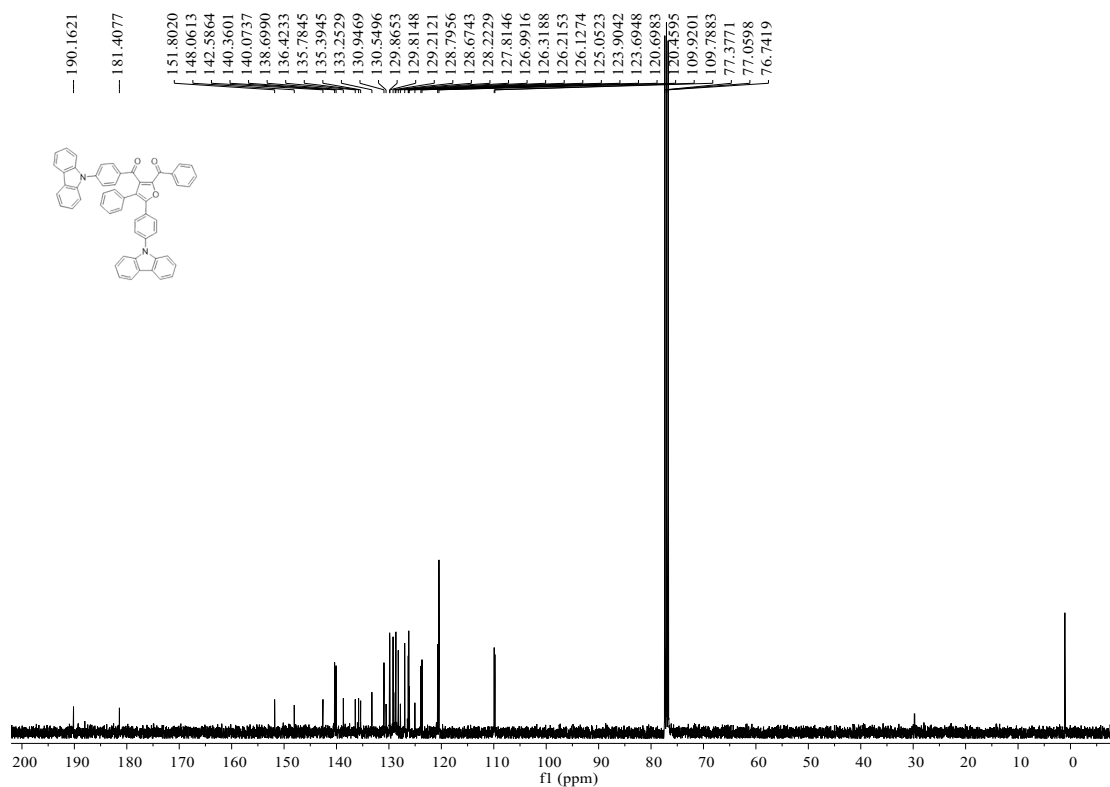

(4,5-di([1,1'-biphenyl]-4-yl)furan-2,3-diyl)bis([1,1'-biphenyl]-4-ylmethanone) (5)

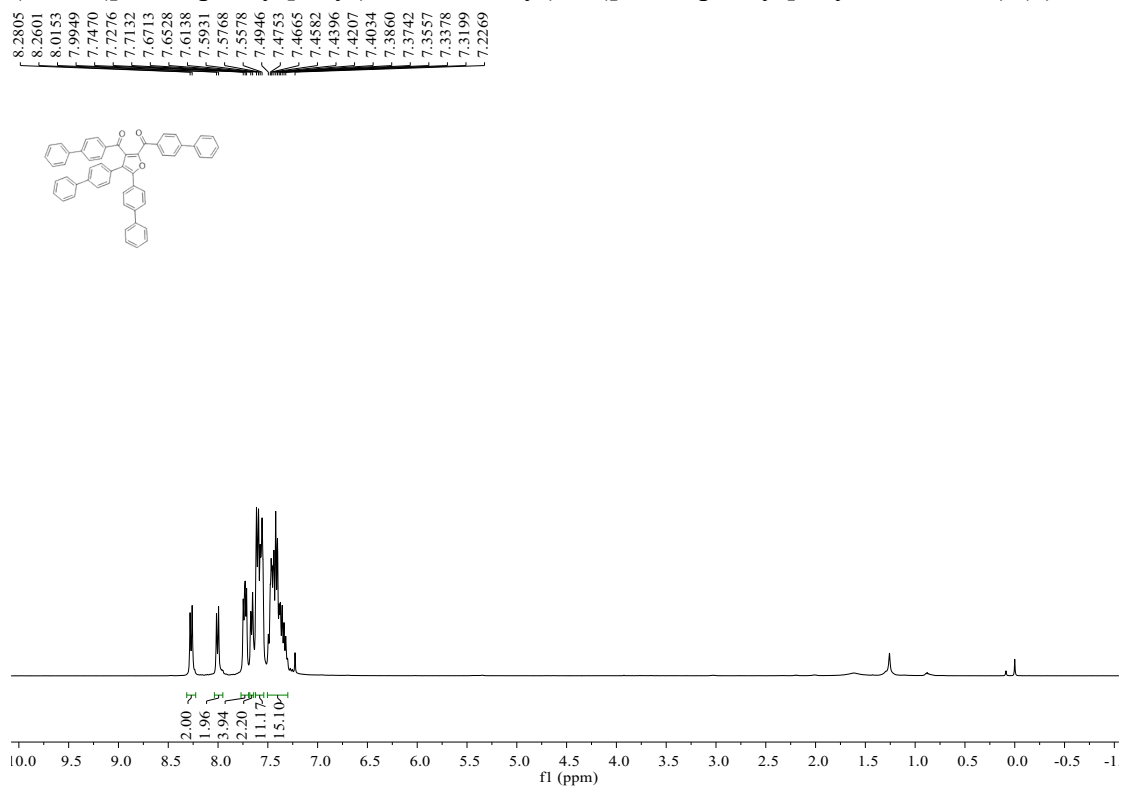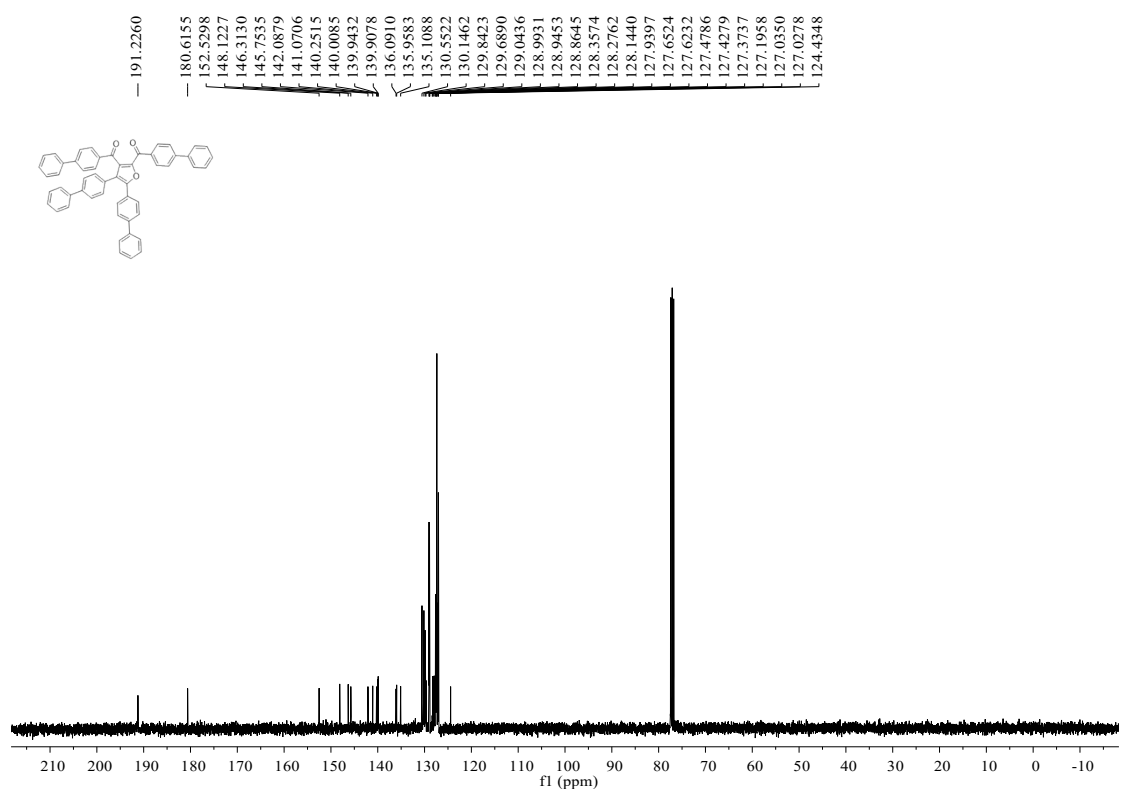

# 1,4-diphenylbuta-1,3-diyne (A)

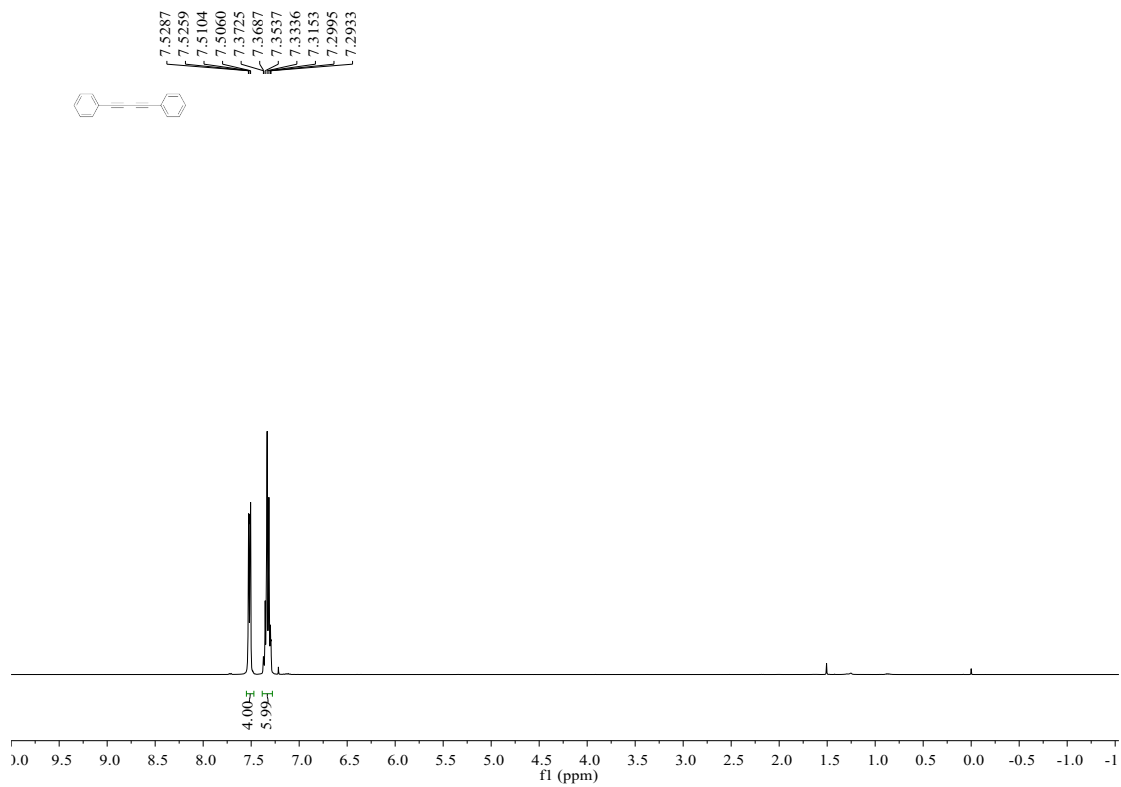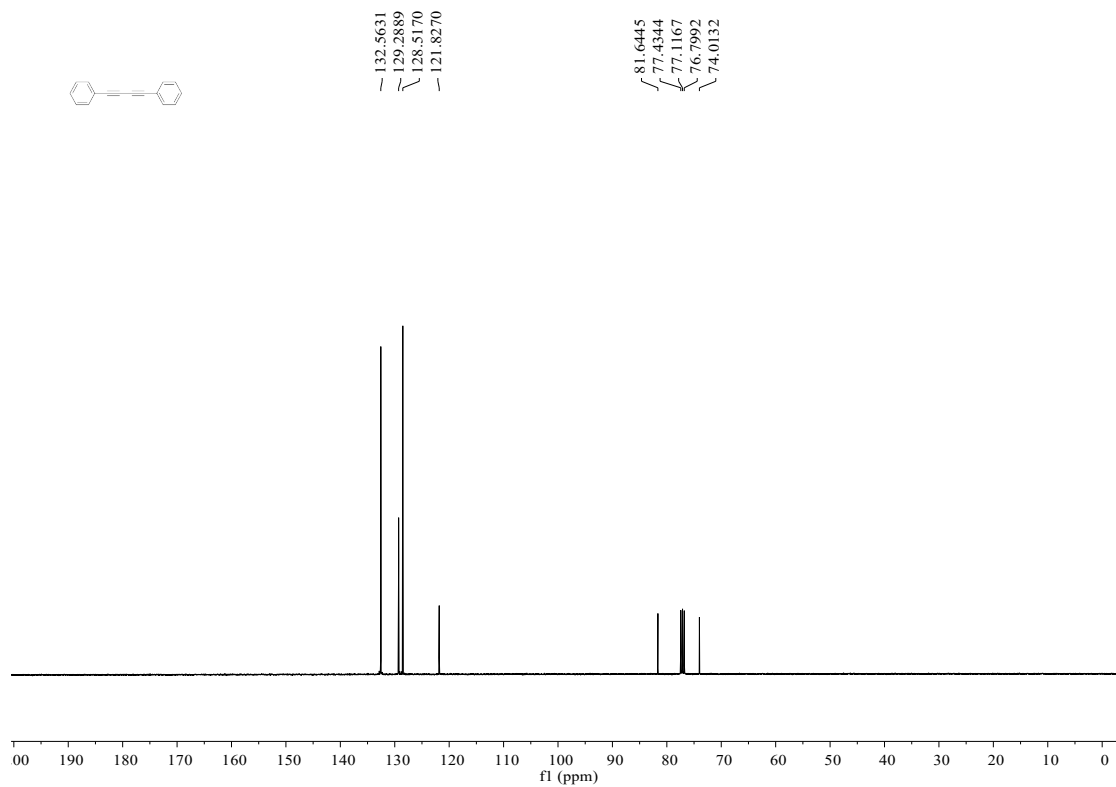

## X-ray crystallographic data of **3ga** (CCDC 2386338)

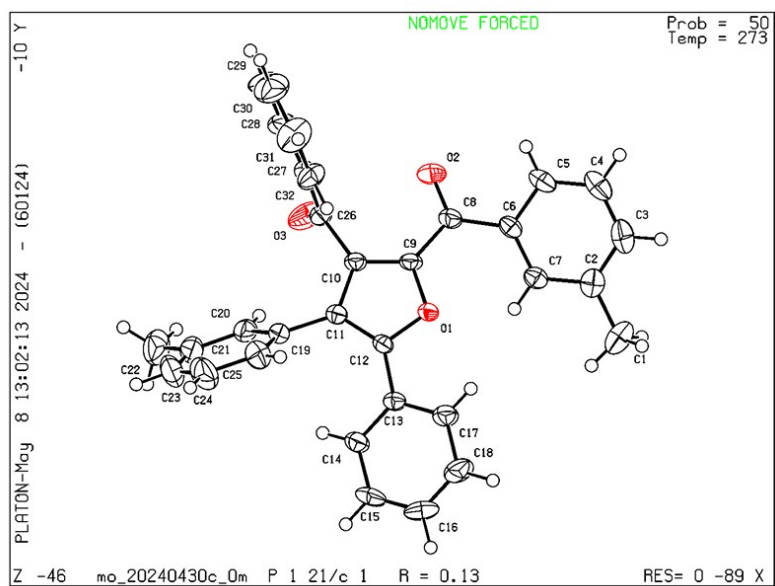

ORTEP drawing of **3ga** showing thermal ellipsoid at the 50% probability level

---

|                        |                        |                         |             |
|------------------------|------------------------|-------------------------|-------------|
| Bond precision:        | C-C = 0.0054 Å         | Wavelength=0.71073      |             |
| Cell:                  | a=12.436 (17)          | b=7.306 (8)             | c=26.63 (4) |
|                        | alpha=90               | beta=94.18 (5)          | gamma=90    |
| Temperature:           | 273 K                  |                         |             |
|                        | Calculated             | Reported                |             |
| Volume                 | 2413 (6)               | 2414 (5)                |             |
| Space group            | P 21/c                 | P 1 21/c 1              |             |
| Hall group             | -P 2ybc                | -P 2ybc                 |             |
| Moiety formula         | C32 H24 O3 [+ solvent] | C32 H24 O3, 0.05[C6H14] |             |
| Sum formula            | C32 H24 O3 [+ solvent] | C32 H24 O3              |             |
| Mr                     | 456.51                 | 456.51                  |             |
| Dx, g cm <sup>-3</sup> | 1.257                  | 1.256                   |             |
| Z                      | 4                      | 4                       |             |
| Mu (mm <sup>-1</sup> ) | 0.080                  | 0.080                   |             |
| F000                   | 960.0                  | 960.0                   |             |
| F000'                  | 960.44                 |                         |             |
| h, k, lmax             | 16, 9, 34              | 16, 9, 34               |             |
| Nref                   | 5669                   | 5645                    |             |
| Tmin, Tmax             | 0.986, 0.988           |                         |             |
| Tmin'                  | 0.986                  |                         |             |

Correction method= Not given

Data completeness= 0.996

Theta (max)= 27.726

R(reflections)= 0.1266 ( 5254)

wR2 (reflections)=  
0.2999 ( 5645)

S = 1.277

Npar= 318

## X-ray crystallographic data of **3ia** (2386337)

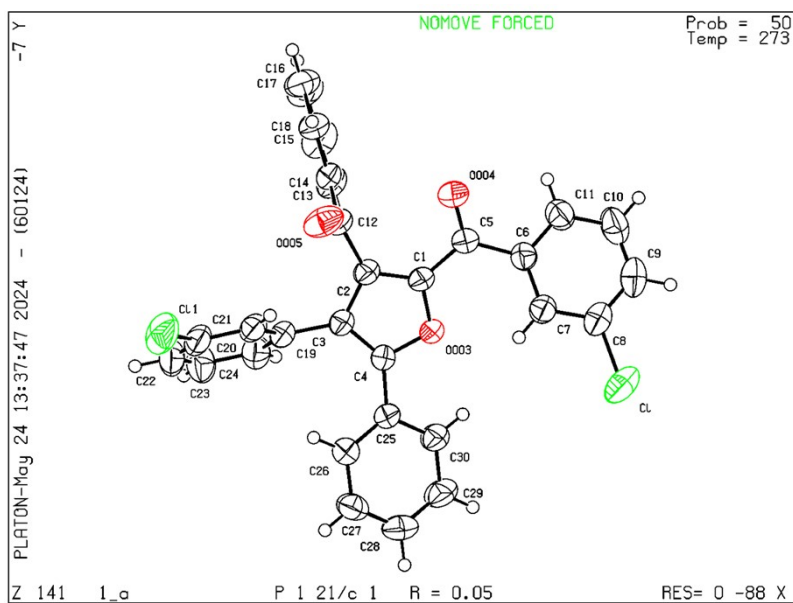

ORTEP drawing of **3ia** showing thermal ellipsoid at the 50% probability level

|                                                               |                           |                                 |
|---------------------------------------------------------------|---------------------------|---------------------------------|
| Bond precision:                                               | C-C = 0.0024 Å            | Wavelength=0.71073              |
| Cell:                                                         | a=12.5894 (8)<br>alpha=90 | b=7.3292 (4)<br>beta=95.011 (2) |
| Temperature:                                                  | 273 K                     |                                 |
|                                                               | Calculated                | Reported                        |
| Volume                                                        | 2443.9 (3)                | 2443.9 (3)                      |
| Space group                                                   | P 21/c                    | P 21/c 1                        |
| Hall group                                                    | -P 2ybc                   | -P 2ybc                         |
| Moiety formula                                                | C30 H18 Cl2 O3            | C30 H18 Cl2 O3                  |
| Sum formula                                                   | C30 H18 Cl2 O3            | C30 H18 Cl2 O3                  |
| Mr                                                            | 497.34                    | 497.34                          |
| Dx, g cm <sup>-3</sup>                                        | 1.352                     | 1.352                           |
| Z                                                             | 4                         | 4                               |
| Mu (mm <sup>-1</sup> )                                        | 0.296                     | 0.296                           |
| F000                                                          | 1024.0                    | 1024.0                          |
| F000'                                                         | 1025.61                   |                                 |
| h, k, lmax                                                    | 16, 9, 34                 | 16, 9, 34                       |
| Nref                                                          | 5625                      | 5488                            |
| Tmin, Tmax                                                    | 0.962, 0.971              | 0.696, 0.746                    |
| Tmin'                                                         | 0.943                     |                                 |
| Correction method= # Reported T Limits: Tmin=0.696 Tmax=0.746 |                           |                                 |
| AbsCorr = MULTI-SCAN                                          |                           |                                 |
| Data completeness=                                            | 0.976                     | Theta (max)= 27.508             |
| R(reflections)=                                               | 0.0472 ( 4716)            | wR2(reflections)=               |
| S =                                                           | 1.063                     | 0.1295 ( 5488)                  |
| Npar=                                                         | 316                       |                                 |



**Crystallization:** Crystals of compound **3ga** and **3ia** suitable for X-ray analysis were grown from the solvent of ethyl acetate/hexane by slow evaporation method.

**X-Ray Data Collection and structure Refinement Details:** Diffraction was performed on a Bruker SMART APEX II CCD area detector diffractometer using graphite-monochromated Mo  $K\alpha$  radiation ( $\lambda = 0.71073 \text{ \AA}$ ) at 293(2) K,  $\varphi$  and  $\omega$  scan technique. An empirical absorption correction was applied using the SADABS program.<sup>1</sup> The structure was solved by direct methods, completed by subsequent difference Fourier syntheses, and refined anisotropically for all nonhydrogen atoms by full-matrix least-squares calculations based on  $F^2$  using the SHELXTL program package.<sup>2</sup> The hydrogen atom coordinates were calculated with SHELXTL by using an appropriate riding model with varied thermal parameters. The residual electron densities of solvent were squeezed by using PLATON.<sup>3</sup> All crystal structural pictures drawn by IUCr web.

#### References

- [1] G. M. Sheldrick, SADABS: Program for Empirical Absorption Correction of Area Detector Data; University of Göttingen: Germany, 1996.
- [2] G. M. Sheldrick, Acta Cryst., 2015, A71, 3-8.
- [3] A. L. Spek, Acta Cryst., 2015, C71, 9-18.
